# Supplementary material for: Targeted Genome Mining—From Compound Discovery to Biosynthetic Pathway Elucidation
Source: PubMed Central journal article supplement (PMC7765855; doi:10.3390/microorganisms8122034), 2020-12-19
Supplement: microorganisms-08-02034-s001.pdf [file microorganisms-08-02034-s001.pdf]

*Supplementary*

# Targeted Genome Mining – From Compound Discovery to Biosynthetic Pathway Elucidation – Supplementary Materials

Nils Gummerlich<sup>1</sup>, Yuriy Rebets<sup>1</sup>, Constanze Paulus<sup>1</sup>, Josef Zapp<sup>2</sup> and Andriy Luzhetskyy<sup>1,3,\*</sup>

<sup>1</sup> Department of Pharmaceutical Biotechnology, Saarland University, Campus C2.3, 66123, Saarbrücken, Germany; [nils.gummerlich@gmx.de](mailto:nils.gummerlich@gmx.de) (N.G.), [yurko.rebets@gmail.com](mailto:yurko.rebets@gmail.com) (Y.R.), [constanzepaulus@gmail.com](mailto:constanzepaulus@gmail.com) (C.P.)

<sup>2</sup> Department of Pharmaceutical Biology, Saarland University, C2.3, 66123 Saarbrücken, Germany; [j.zapp@mx.uni-saarland.de](mailto:j.zapp@mx.uni-saarland.de) (J.Z.)

<sup>3</sup> Helmholtz-Institute for Pharmaceutical Research Saarland (HIPS), Campus E8.1, 66123, Saarbrücken, Germany.

\* Correspondence: [a.luzhetskyy@mx.uni-saarland.de](mailto:a.luzhetskyy@mx.uni-saarland.de) Tel.: +49-681-302-70200 (A.L.)

\* Correspondence: [andriy.luzhetskyy@helmholtz-hips.de](mailto:andriy.luzhetskyy@helmholtz-hips.de); Tel.: +49-681-302-70200 (A.L.)

Received: date; Accepted: date; Published: date

## List of tables

|                                                                                                                                                         |    |
|---------------------------------------------------------------------------------------------------------------------------------------------------------|----|
| Table S 1 Oligonucleotides used in this work; All Oligonucleotides were produced by Eurofins (Eurofins Genomics Germany GmbH, Ebersberg, Germany) ..... | 9  |
| Table S 2 Strains, Plasmids and BACs used in this work.....                                                                                             | 12 |
| Table S 3 Preparative HPLC method for pentangumycin (CMP468) & SEK90 (CMP791); 20 mL/min flow rate .....                                                | 14 |
| Table S 4 AntiSMASH predicted biosynthetic gene clusters in <i>S. espanaensis</i> .....                                                                 | 16 |
| Table S 5 NMR spectroscopic data of 1E5_CMP1 ( $CDCl_3$ ).....                                                                                          | 17 |
| Table S 3 NMR spectroscopic data of 1E5_CMP2 ( $CDCl_3$ ).....                                                                                          | 18 |
| Table S 7 Preparative HPLC method and yield for 8 and 9; Flow Rate: 20mL/min .....                                                                      | 15 |

## List of Figures

|                                                                                                                                                                                                                                                          |    |
|----------------------------------------------------------------------------------------------------------------------------------------------------------------------------------------------------------------------------------------------------------|----|
| Figure S 1 HPLC-MS Extracted ion chromatogram (Extracted mass 309±0.5) of <i>S. lividans</i> ΔYA6_3C18 and the corresponding mass chromatogram .....                                                                                                     | 19 |
| Figure S2 HPLC-MS Extracted ion chromatogram (Extracted mass 468±0.5) of <i>S. albus</i> J1074_1E5 (up) and <i>S. lividans</i> Δ6_1E5 (down) .....                                                                                                       | 20 |
| Figure S 3 HPLC-MS Extracted ion chromatogram; a) Extracted mass 468.00 – 468.20, Ethyl acetate extract of <i>S. espanaensis</i> grown in SG Medium; b) Extracted mass 791.10 – 791.30; Butanol extract of <i>S. espanaensis</i> grown in SG Medium..... | 21 |
| Figure S 4 Structure of Pentangumycin with all correlations (green: HMBC correlations H → C; blue: <sup>1</sup> H- <sup>1</sup> H-Cosy correlation) .....                                                                                                | 22 |
| Figure S 5 <sup>1</sup> H-NMR spectrum (500 MHz, DMSO-d <sub>6</sub> ) of Pentangumycin; complete Spectrum and zoom from 1.7 to 0.1 ppm .....                                                                                                            | 23 |
| Figure S 6 <sup>1</sup> H-NMR spectrum (500 MHz, DMSO-d <sub>6</sub> ) of Pentangumycin; complete Spectrum and zoom from 2.7 to 1.7 ppm .....                                                                                                            | 24 |
| Figure S 7 <sup>1</sup> H-NMR spectrum (500 MHz, DMSO-d <sub>6</sub> ) of Pentangumycin; complete Spectrum and zoom from 3.65 to 2.65 ppm .....                                                                                                          | 25 |
| Figure S 8 <sup>1</sup> H-NMR spectrum (500 MHz, DMSO-d <sub>6</sub> ) of Pentangumycin; complete Spectrum and zoom from 4.6 to 3.6 ppm .....                                                                                                            | 26 |
| Figure S 9 <sup>1</sup> H-NMR spectrum (500 MHz, DMSO-d <sub>6</sub> ) of Pentangumycin; complete Spectrum and zoom from 5.6 to 4.6 ppm .....                                                                                                            | 27 |
| Figure S 10 <sup>1</sup> H-NMR spectrum (500 MHz, DMSO-d <sub>6</sub> ) of Pentangumycin; complete Spectrum and zoom from 6.7 to 5.7 ppm .....                                                                                                           | 28 |
| Figure S 11 <sup>1</sup> H-NMR spectrum (500 MHz, DMSO-d <sub>6</sub> ) of Pentangumycin; complete Spectrum and zoom from 7.6 to 6.7 ppm .....                                                                                                           | 29 |
| Figure S 12 <sup>1</sup> H-NMR spectrum (500 MHz, DMSO-d <sub>6</sub> ) of Pentangumycin; complete Spectrum and zoom from 7.6 to 6.7 ppm .....                                                                                                           | 30 |
| Figure S 13 <sup>13</sup> C-NMR (125 MHz, DMSO- d <sub>6</sub> ) of Pentangumycin; complete spectrum and zoom from 60 to 0 ppm. ....                                                                                                                     | 31 |
| Figure S 14 <sup>13</sup> C-NMR (125 MHz, DMSO- d <sub>6</sub> ) of Pentangumycin; complete spectrum and zoom from 130 to 70 ppm. ....                                                                                                                   | 32 |
| Figure S 15 <sup>13</sup> C-NMR (125 MHz, DMSO- d <sub>6</sub> ) of Pentangumycin; complete spectrum and zoom from 190 to 130 ppm. ....                                                                                                                  | 33 |
| Figure S 16 <sup>1</sup> H- <sup>1</sup> H- COSY spectrum (500 MHz, DMSO-d <sub>6</sub> ) of Pentangumycin .....                                                                                                                                         | 34 |
| Figure S 17 <sup>1</sup> H- <sup>1</sup> H- COSY spectrum (500 MHz, DMSO-d <sub>6</sub> ) of Pentangumycin; Zoom to aromatic region .....                                                                                                                | 35 |

|                                                                                                                                                                             |    |
|-----------------------------------------------------------------------------------------------------------------------------------------------------------------------------|----|
| Figure S 18 $^1\text{H}$ - $^1\text{H}$ - COSY spectrum (500 MHz, DMSO- $d_6$ ) of Pentangumycin; Zoom from 8.5 to 4.5 ppm .....                                            | 36 |
| Figure S 19 HSQC-spectrum (500 MHz; 125 MHz, DMSO- $d_6$ ) of Pentangumycin; complete spectrum                                                                              | 37 |
| Figure S 20 HSQC-spectrum (500 MHz; 125 MHz, DMSO- $d_6$ ) of Pentangumycin; zoom from 7.9 to 6.8 ppm and 139 to 107 ppm .....                                              | 38 |
| Figure S 21 HSQC-spectrum (500 MHz; 125 MHz, DMSO- $d_6$ ) of Pentangumycin; zoom from 4 to 2 ppm and 59 to 19 ppm .....                                                    | 39 |
| Figure S 22 HMBC-spectrum (500 MHz; 125 MHz, DMSO- $d_6$ ) of Pentangumycin; complete spectrum .....                                                                        | 40 |
| Figure S 23 HMBC - HSQC-Overlay spectrum (500 MHz; 125 MHz, DMSO- $d_6$ ) of Pentangumycin (black: HMBC; red/blue: HSQC); zoom from 9.2 to 6.5 ppm and 195 to 110 ppm.....  | 41 |
| Figure S 24 HMBC - HSQC-Overlay spectrum (500 MHz; 125 MHz, DMSO- $d_6$ ) of Pentangumycin (black: HMBC; red/blue: HSQC); zoom from 9.2 to 6.5 ppm and 50 to 31 ppm.....    | 42 |
| Figure S 25 HMBC - HSQC-Overlay spectrum (500 MHz; 125 MHz, DMSO- $d_6$ ) of Pentangumycin (black: HMBC; red/blue: HSQC); zoom from 4.6 to 3.5 ppm and 110 to 175 ppm.....  | 43 |
| Figure S 26 HMBC - HSQC-Overlay spectrum (500 MHz; 125 MHz, DMSO- $d_6$ ) of Pentangumycin (black: HMBC; red/blue: HSQC); zoom from 4.6 to 3.7 ppm and 62 to 34 ppm.....    | 44 |
| Figure S 27 HMBC - HSQC-Overlay spectrum (500 MHz; 125 MHz, DMSO- $d_6$ ) of Pentangumycin (black: HMBC; red/blue: HSQC); zoom from 2.6 to 1.4 ppm and 174 to 151 ppm.....  | 45 |
| Figure S 28 Structure of SEK90 with all correlations (green: HMBC correlations $\text{H} \rightarrow \text{C}$ ; blue: $^1\text{H}$ - $^1\text{H}$ -Cosy correlation) ..... | 46 |
| Figure S 29 $^1\text{H}$ -NMR spectrum (500 MHz, DMSO- $d_6$ ) of SEK90; complete Spectrum and zoom from 1.8 to 0.7 ppm .....                                               | 47 |
| Figure S 30 $^1\text{H}$ -NMR spectrum (500 MHz, DMSO- $d_6$ ) of SEK90; complete Spectrum and zoom from 4.4 to 3.4 ppm .....                                               | 48 |
| Figure S 31 $^1\text{H}$ -NMR spectrum (500 MHz, DMSO- $d_6$ ) of SEK90; complete Spectrum and zoom from 7.2 to 5.7 ppm .....                                               | 49 |
| Figure S 32 $^1\text{H}$ -NMR spectrum (500 MHz, DMSO- $d_6$ ) of SEK90; complete Spectrum and zoom from 13 to 9.5 ppm .....                                                | 50 |
| Figure S 33 $^{13}\text{C}$ -NMR spectrum (125 MHz, DMSO- $d_6$ ) of SEK90; complete Spectrum and zoom from 202 to 196 ppm .....                                            | 51 |
| Figure S 34 $^{13}\text{C}$ -NMR spectrum (125 MHz, DMSO- $d_6$ ) of SEK90; complete Spectrum and zoom from 168 to 60 ppm .....                                             | 52 |
| Figure S 35 $^{13}\text{C}$ -NMR spectrum (125 MHz, DMSO- $d_6$ ) of SEK90; complete Spectrum and zoom from 155 to 113 ppm .....                                            | 53 |



|                                                                                                                                                                                                                                                                                                                                    |    |
|------------------------------------------------------------------------------------------------------------------------------------------------------------------------------------------------------------------------------------------------------------------------------------------------------------------------------------|----|
| Figure S 36 <sup>13</sup> C-NMR spectrum (125 MHz, DMSO-d <sub>6</sub> ) of SEK90; complete Spectrum and zoom from 105 to 92 ppm .....                                                                                                                                                                                             | 54 |
| Figure S 37 <sup>13</sup> C-NMR spectrum (125 MHz, DMSO-d <sub>6</sub> ) of SEK90; complete Spectrum and zoom from 37 to 20 ppm .....                                                                                                                                                                                              | 55 |
| Figure S 38 <sup>13</sup> C-NMR spectrum (125 MHz, DMSO-d <sub>6</sub> ) of SEK90; complete Spectrum and zoom from 26 to 6 ppm .....                                                                                                                                                                                               | 56 |
| Figure S 39 <sup>1</sup> H- <sup>1</sup> H- COSY spectrum (500 MHz, DMSO-d <sub>6</sub> ) of SEK90.....                                                                                                                                                                                                                            | 57 |
| Figure S 40 <sup>1</sup> H- <sup>1</sup> H- COSY spectrum (500 MHz, DMSO-d <sub>6</sub> ) of SEK90; zoom from 8 to 6.2 ppm .....                                                                                                                                                                                                   | 58 |
| Figure S 41 <sup>1</sup> H- <sup>1</sup> H- COSY spectrum (500 MHz, DMSO-d <sub>6</sub> ) of SEK90; zoom from 7 to 0.5 ppm .....                                                                                                                                                                                                   | 59 |
| Figure S 42 HSQC-spectrum (500 MHz; 125 MHz, DMSO-d <sub>6</sub> ) of SEK90 .....                                                                                                                                                                                                                                                  | 60 |
| Figure S 43 HSQC-spectrum (500 MHz; 125 MHz, DMSO-d <sub>6</sub> ) of SEK90; zoom from 7.5 to 5.5 ppm and 135 to 99 ppm .....                                                                                                                                                                                                      | 61 |
| Figure S 44 HSQC-spectrum (500 MHz; 125 MHz, DMSO-d <sub>6</sub> ) of SEK90; zoom from 4 to 0,5 ppm and 53 to 16 ppm .....                                                                                                                                                                                                         | 62 |
| Figure S 45 HSQC-spectrum (500 MHz; 125 MHz, DMSO-d <sub>6</sub> ) of SEK90; zoom from 4 to 0.5 ppm and 53 to 16 ppm .....                                                                                                                                                                                                         | 63 |
| Figure S 46 HMBC - HSQC-Overlay spectrum (500 MHz; 125 MHz, DMSO-d <sub>6</sub> ) of SEK90 (red: HMBC; black/green: HSQC) .....                                                                                                                                                                                                    | 64 |
| Figure S 47 HMBC - HSQC-Overlay spectrum (500 MHz; 125 MHz, DMSO-d <sub>6</sub> ) of SEK90 (black: HMBC; red/blue: HSQC); zoom from 13 to 10 ppm and 170 to 105 ppm.....                                                                                                                                                           | 65 |
| Figure S 48 HMBC - HSQC-Overlay spectrum (500 MHz; 125 MHz, DMSO-d <sub>6</sub> ) of SEK90 (black: HMBC; red/blue: HSQC); zoom from 13 to 10 ppm and 170 to 105 ppm.....                                                                                                                                                           | 66 |
| Figure S 49 HMBC - HSQC-Overlay spectrum (500 MHz; 125 MHz, DMSO-d <sub>6</sub> ) of SEK90 (black: HMBC; red/blue: HSQC); zoom from 6.5 to 0.5 ppm and 51 to 10 ppm.....                                                                                                                                                           | 67 |
| Figure S 50 HMBC - HSQC-Overlay spectrum (500 MHz; 125 MHz, DMSO-d <sub>6</sub> ) of SEK90 (black: HMBC; red/blue: HSQC); zoom from 4.5 to 0.5 ppm and 185 to 100 ppm.....                                                                                                                                                         | 68 |
| Figure S 51 Structures of SEK87, SEK43 and 1E5_CMP1 & 1E5_CMP2 .....                                                                                                                                                                                                                                                               | 69 |
| Figure S 52 HPLC-MS Extracted ion chromatogram (Extracted mass 468±0.5) of a) <i>S. lividans</i> ΔYA6_1E5Δ54860 and b) <i>S. lividans</i> ΔYA6_1E5Δ55110; The production is unchanged in the deletion of the NRPS/PKSI hybrid core gene, while the production is abolished in the created mutant lacking the type II PKS gene..... | 70 |
| Figure S 53 Genes (WP_124773686 & WP_124773691-WP124773694) of <i>Micromonospora</i> sp. LB39 mapped to Pentangumycins biosynthetic gene cluster .....                                                                                                                                                                             | 71 |
| Figure S 54 <sup>1</sup> H-NMR spectrum (500 MHz, CDCl <sub>3</sub> ) of 1E5_CMP1; zoom from 10.8 ppm to 10.5 ppm..                                                                                                                                                                                                                | 72 |

|                                                                                                                                                                                                                                                                                                                                                   |    |
|---------------------------------------------------------------------------------------------------------------------------------------------------------------------------------------------------------------------------------------------------------------------------------------------------------------------------------------------------|----|
| Figure S 55 <sup>1</sup> H-NMR spectrum (500 MHz, CDCL <sub>3</sub> ) of 1E5_CMP1; zoom from 7.4 ppm to 7.2 ppm.....                                                                                                                                                                                                                              | 73 |
| Figure S 56 <sup>1</sup> H-NMR spectrum (500 MHz, CDCL <sub>3</sub> ) of 1E5_CMP1; zoom from 6 ppm to 3.5 ppm.....                                                                                                                                                                                                                                | 74 |
| Figure S 57 <sup>1</sup> H- <sup>1</sup> H- COSY spectrum (500 MHz, CDCL <sub>3</sub> ) of 1E5_CMP1 .....                                                                                                                                                                                                                                         | 75 |
| Figure S 58 HSQC-spectrum (500 MHz; 125 MHz, CDCL <sub>3</sub> ) of 1E5_CMP1.....                                                                                                                                                                                                                                                                 | 76 |
| Figure S 59 Structure of 1E5_CMP2 with all observed correlations (HMBC: green; <sup>1</sup> H- <sup>1</sup> H-Cosy: blue)<br>.....                                                                                                                                                                                                                | 77 |
| Figure S 60 <sup>1</sup> H-NMR spectrum (500 MHz, CDCL <sub>3</sub> ) of 1E5_CMP2; zoom from 11.6 to 9.5 ppm .....                                                                                                                                                                                                                                | 78 |
| Figure S 61 <sup>1</sup> H-NMR spectrum (500 MHz, CDCL <sub>3</sub> ) of 1E5_CMP2; zoom from 7.4 to 7.2 ppm .....                                                                                                                                                                                                                                 | 79 |
| Figure S 62 <sup>1</sup> H-NMR spectrum (500 MHz, CDCL <sub>3</sub> ) of 1E5_CMP2; zoom from 5.96 to 5.8 ppm .....                                                                                                                                                                                                                                | 80 |
| Figure S 63 <sup>1</sup> H-NMR spectrum (500 MHz, CDCL <sub>3</sub> ) of 1E5_CMP2; zoom from 4.25 to 3.75 ppm .....                                                                                                                                                                                                                               | 81 |
| Figure S 64 <sup>1</sup> H-NMR spectrum (500 MHz, CDCL <sub>3</sub> ) of 1E5_CMP2; zoom from 2.5 to 0.5 ppm .....                                                                                                                                                                                                                                 | 82 |
| Figure S 65 <sup>1</sup> H- <sup>1</sup> H- COSY spectrum (500 MHz, CDCL <sub>3</sub> ) of 1E5_CMP2 .....                                                                                                                                                                                                                                         | 83 |
| Figure S 66 HSQC-spectrum (500 MHz; 125 MHz, CDCL <sub>3</sub> ) of 1E5_CMP2 .....                                                                                                                                                                                                                                                                | 84 |
| Figure S 67 HMBC-spectrum (500 MHz; 125 MHz, CDCL <sub>3</sub> ) of 1E5_CMP2 .....                                                                                                                                                                                                                                                                | 85 |
| Figure S 68 HPLC-MS Extracted ion chromatogram (Extracted mass 417±0.5) of a) Spontaneously<br>formed 8; b) synthesized 8; c) mass chromatogram of a).....                                                                                                                                                                                        | 86 |
| Figure S 69 HPLC-MS Extracted ion chromatogram (Extracted mass 459.1±0.1) of a) Spontaneously<br>formed 9; b) synthesized 9; c) mass chromatogram of a).....                                                                                                                                                                                      | 87 |
| Figure S 70 HPLC Extracted ion chromatogram (Extracted mass 396.05-696.20) of <i>S. lividans</i> ΔYA6 1E5<br>b) mass of SEK43 .....                                                                                                                                                                                                               | 88 |
| Figure S 71 HPLC Extracted ion chromatogram (Extracted mass 749.15-749.22) of <i>S. lividans</i> ΔYA6 1E5<br>b) mass of SEK87 .....                                                                                                                                                                                                               | 89 |
| Figure S 72 HPLC-MS Extracted ion chromatogram (Extracted mass 468±0.5) of a) <i>S. lividans</i><br>ΔYA6_1E5 with <sup>13</sup> C-9- <sup>15</sup> N-1-labelled L-tyrosine added to the medium b) MS-Chromatogram of a),<br>incorporation of <sup>13</sup> C-9- <sup>15</sup> N-1-labelled L-tyrosine visible; First repeat of a triplicate ..... | 90 |
| Figure S 73 HPLC-MS Extracted ion chromatogram (Extracted mass 468±0.5) of a) <i>S. lividans</i><br>ΔYA6_1E5 with <sup>13</sup> C-9- <sup>15</sup> N-1-labelled L-tyrosine added to the medium b) MS-Chromatogram of a),<br>incorporation of <sup>13</sup> C-9- <sup>15</sup> N-1-labelled L-tyrosine visible; second repeat of a triplicate..... | 91 |
| Figure S 74 HPLC-MS Extracted ion chromatogram (Extracted mass 468±0.5) of a) <i>S. lividans</i><br>ΔYA6_1E5 with <sup>13</sup> C-9- <sup>15</sup> N-1-labelled L-tyrosine added to the medium b) MS-Chromatogram of a),<br>incorporation of <sup>13</sup> C-9- <sup>15</sup> N-1-labelled L-tyrosine visible; Third repeat of a triplicate.....  | 91 |

|                                                                                                                                                                                                                                                                                                                                                                                                                                           |    |
|-------------------------------------------------------------------------------------------------------------------------------------------------------------------------------------------------------------------------------------------------------------------------------------------------------------------------------------------------------------------------------------------------------------------------------------------|----|
| Figure S 75 HPLC-MS Extracted ion chromatogram (Extracted mass $468\pm 0.5$ ) of a) <i>S. lividans</i> $\Delta$ YA6_1E5 without 13C-9-15N-1-labelled L-tyrosine added to the medium b) MS-Chromatogram of a) no incorporation of 13C-9-15N-1-labelled L-tyrosine visible; first repeat of a triplicate.....                                                                                                                               | 91 |
| Figure S 76 HPLC-MS Extracted ion chromatogram (Extracted mass $468\pm 0.5$ ) of a) <i>S. lividans</i> $\Delta$ YA6_1E5 without 13C-9-15N-1-labelled L-tyrosine added to the medium b) MS-Chromatogram of a) no incorporation of 13C-9-15N-1-labelled L-tyrosine visible; second repeat of a triplicate .....                                                                                                                             | 92 |
| Figure S 77 HPLC-MS Extracted ion chromatogram (Extracted mass $468\pm 0.5$ ) of a) <i>S. lividans</i> $\Delta$ YA6_1E5 without 13C-9-15N-1-labelled L-tyrosine added to the medium b) MS-Chromatogram of a) no incorporation of 13C-9-15N-1-labelled L-tyrosine visible; third repeat of a triplicate .....                                                                                                                              | 94 |
| Figure S 78 HPLC-MS Extracted ion chromatogram (Extracted mass $411\pm 0.5$ ; corresponding mass to (3)) of a) <i>S. lividans</i> $\Delta$ YA6; b) <i>S. lividans</i> $\Delta$ YA6_1E5; c) <i>S. lividans</i> $\Delta$ YA6 $\Delta$ penA; d) <i>S. lividans</i> $\Delta$ YA6 $\Delta$ penC; e) <i>S. lividans</i> $\Delta$ YA6 $\Delta$ penD; peak visible in c); f) ESI Full MS chromatogram of the peak visible in c) $R_t=13.47$ ..... | 95 |
| Figure S 79 HPLC-MS Extracted ion chromatogram (Extracted mass 427.09-427.18; corresponding mass to (4)) of a) <i>S. lividans</i> $\Delta$ YA6; b) <i>S. lividans</i> $\Delta$ YA6_1E5; c) <i>S. lividans</i> $\Delta$ YA6 $\Delta$ penA; d) <i>S. lividans</i> $\Delta$ YA6 $\Delta$ penC; e) <i>S. lividans</i> $\Delta$ YA6 $\Delta$ penD; peak visible in d); f) ESI full MS of the peak visible in d) ( $R_t=10.22$ ).....           | 96 |
| Figure S 80 HPLC-MS Extracted ion chromatogram (Extracted mass 454.10-454.17; corresponding mass to (5)) of a) <i>S. lividans</i> $\Delta$ YA6; b) <i>S. lividans</i> $\Delta$ YA6_1E5; c) <i>S. lividans</i> $\Delta$ YA6 $\Delta$ penA; d) <i>S. lividans</i> $\Delta$ YA6 $\Delta$ penC; e) <i>S. lividans</i> $\Delta$ YA6 $\Delta$ penD; peak visible in e); f) ESI full MS of the peak visible in e) ( $R_t=12.02$ ).....           | 97 |
| Figure S 81 HPLC-MS Extracted ion chromatogram (Extracted mass $339\pm 0.5$ , Rabelomycin) of a) <i>S. lividans</i> $\Delta$ YA6 1E5, b) <i>S. lividans</i> $\Delta$ YA6 1E5 $\Delta$ penE c) pure rabelomycin as external standard.....                                                                                                                                                                                                  | 1  |
| Figure S 82 HPLC-MS Extracted ion chromatogram (Extracted mass $468\pm 0.5$ , (1)) of a) <i>S. lividans</i> $\Delta$ YA6 1E5, b) <i>S. lividans</i> $\Delta$ YA6 1E5 $\Delta$ penR1 and c) <i>S. lividans</i> $\Delta$ YA6 1E5 $\Delta$ penR2 .....                                                                                                                                                                                       | 2  |
| Figure S 83 HPLC-MS Extracted ion chromatogram (Extracted mass $468\pm 0.5$ (1)) of a) <i>S. lividans</i> $\Delta$ YA6 1E5, b) <i>S. lividans</i> $\Delta$ YA6 A3_penR1 1E5 and c) <i>S. lividans</i> $\Delta$ YA6 A3_penR2 1E5 .....                                                                                                                                                                                                     | 3  |
| Figure S 84 HPLC-MS Extracted ion chromatogram (Extracted mass 791.10-791.25 (2)) of a) <i>S. lividans</i> $\Delta$ YA6 1E5, b) <i>S. lividans</i> $\Delta$ YA6 A3_penR1 1E5 and c) <i>S. lividans</i> $\Delta$ YA6 A3_penR2 1E5 .....                                                                                                                                                                                                    | 4  |
| Figure S 85 HPLC-MS Extracted ion chromatogram a) <i>S. lividans</i> $\Delta$ YA6 A3_penR1 (Extracted mass $491\pm 0.5$ (6) and $452\pm 0.5$ (7)), b) <i>S. lividans</i> $\Delta$ YA6 A3_penR1 1E5 (Extracted mass $452\pm 0.5$ (7)) c) <i>S. lividans</i> $\Delta$ YA6 A3_penR1 1E5 (Extracted mass $491\pm 0.5$ (6)).....                                                                                                               | 5  |
| Figure S 86 HPLC-MS Extracted ion chromatogram (Extracted mass $491\pm 0.5$ ) of a) <i>S. lividans</i> $\Delta$ YA6_A3_penR1 1E5 with L-tryptophan 13C-11 added to the medium b) MS-Chromatogram of a), incorporation of L-tryptophan 13C-11 visible .....                                                                                                                                                                                | 6  |
| Figure S 87 HPLC-MS Extracted ion chromatogram (Extracted mass $452\pm 0.5$ ) of a) <i>S. lividans</i> $\Delta$ YA6_A3_penR1 1E5 with 2D-5-labelled L-Phenylalanine added to the medium b) MS-Chromatogram of a), incorporation of 2D-5-labelled L-Phenylalanine visible .....                                                                                                                                                            | 7  |



Table S 1 Oligonucleotides used in this work; All Oligonucleotides were produced by Eurofins (Eurofins Genomics Germany GmbH, Ebersberg, Germany)

| Name        | Sequence of the Oligonucleotide                                            |
|-------------|----------------------------------------------------------------------------|
| f3E7test    | GTCGTTGACCCTCAGCAAGT                                                       |
| r3E7test    | GCCTACCACTTCTACGCGTT                                                       |
| f1G5test    | GTAGGCGAACAACCTGCAACG                                                      |
| r1G5test    | CTTCATGCGCAAGGAGATGC                                                       |
| f1C15test   | ACCCGATCGGCCTCAAGATC                                                       |
| r1C15test   | AGATCACGATCATCGCGGTC                                                       |
| f3K5test    | GCGAAGTACGACACGACGTA                                                       |
| r3K5test    | GGGGTGTCCGGTTCTACAAG                                                       |
| f1F6tes     | ATGCTCAGGATCGAATCGCC                                                       |
| r1F6test    | ACAGCTACGCCTTCGACTTC                                                       |
| f1C7test    | GAATCATCGCCGACAGCAAC                                                       |
| r1C7test    | GTTCTCGTCGATCTTGCCGA                                                       |
| f3E19test   | AGCCTGGTCAACCACTGTTC                                                       |
| r3E19test   | AGCCCAACAGTTGATAGCCC                                                       |
| f1G11test   | CCTTCGAGATCTCCGGGTTG                                                       |
| r1G11test   | GACTCGGGAACCTTACGC                                                         |
| f3C18test   | GAGTACCACATCGCCACCAA                                                       |
| r3C18test   | AGAGGATCTCCAGGTCGTCG                                                       |
| f1L8test    | CCACTGACGTGACGCATACT                                                       |
| r1L8test    | GTGAGCAGTGAGGTGTGGTT                                                       |
| f3M21test   | AGACCGTCGAGCTGAACAAG                                                       |
| r3M21test   | CACACCGTCTGGAGGATCTG                                                       |
| f1E5test    | AAGCTGTGGTTGTAATCCGG                                                       |
| r1E5test    | GCTTTCGGGGTCAATTGTTCG                                                      |
| f3A24test   | AGTTCGTGGAAGCGCTGGAC                                                       |
| r3A24test   | AAGTCCTCCAGGACCTTCACC                                                      |
| f3K17test   | GAAGACGTTCGATGCTCCACA                                                      |
| r3K17test   | ATCTTCGCCGGCTACAACAT                                                       |
| f-del-54860 | CACCACGCCCCGGCACGACGACCCGGCCACCGCGTCACGGC<br>TTCCGGGGATCCGTCGACCC          |
| r-del-54860 | GGGCCGCGCCAGCACCATGGCGCTCTGGAAGCCGCCGAAAC<br>TGTAGGCTGGAGCTGCTTCG          |
| f-del-55110 | ATGGAGCCCATCGCGATCATCGGTGTGGGGTGCCGGTTCCC<br>TTCCGGGGATCCGTCGACCC          |
| r-del-55110 | CGCGACCTCGCGCGGTGGTTCGTCACGACGCAGCGACGGCA<br>TGTAGGCTGGAGCTGCTTCG          |
| f-chk-54860 | GCCTGCTTCGACGCGATCAA                                                       |
| r-chk-54860 | GATCACGCCCATGTCTGAACG                                                      |
| f-chk-55110 | GATCACGCTCTCCCAGACG                                                        |
| r-chk-55110 | GACGAGTCCTTCATCGCCAA                                                       |
| f-del-54730 | GTGACCACCACAAGCCCCGCCTCCACGATCGACCTCTATTCCGACGAATT<br>CCGGGGATCCGTCGACCC   |
| r-del-54730 | TCAGCGGTGCAGGGTGGTTCGGGAGCGCGGCGATGCCGCGGATGGTGTGTTG<br>TAGGCTGGAGCTGCTTCG |
| f-del-54740 | ATGAGGCTGATCGTCGATCGCGACCGCTGCGAAGGGCACGGCGTGTGCGTT<br>CCGGGGATCCGTCGACCC  |
| r-del-54740 | TCAGCCTTCCAGCTTGAGGGCGGCGACCGGGCAGATGAGCACCGAGTCGT<br>GTAGGCTGGAGCTGCTTCG  |

|                 |                                                                            |
|-----------------|----------------------------------------------------------------------------|
| f-del-54750     | ATGGAGAGCACGGCGCGAACGGTGTTCGCCCCGGCCTCGGCCCGCACCAT<br>CCGGGGATCCGTCGACCC   |
| r-del-54750     | CTAGGACACCCTGGTCCGGGCCGCCCGCCCTTGAGCAGCCGGCCCAGCTG<br>TAGGCTGGAGCTGCTTCG   |
| f-del-54760     | ATGTCAGAGGAGAGCACCGAGAACACGACCGCCATGCGGTTGCTGCGGCT<br>TCCGGGGATCCGTCGACCC  |
| r-del-54760     | CTAGGCGCGCACTGCTTCTACGACGCTGCACAGCCCCGGCGGGGACGATCTG<br>TAGGCTGGAGCTGCTTCG |
| f-del-54770+80  | ATGCCGGTAATCGCGGCGAACGACGGTTGTCTGACCGTCTTCAACATGTTTC<br>CGGGGATCCGTCGACCC  |
| r-del-54770+80  | TCAGTGCGGGCGGGTCGACCAGCCCCAGTTGGACGAGGATGCCCATGTCGTG<br>TAGGCTGGAGCTGCTTCG |
| f-del-54790     | ATGAGCACACCCCCGTCACTGGTCGTCGTCGGCGCGTCCTTGCCCGGTCTTC<br>CGGGGATCCGTCGACCC  |
| r-del-54790     | TCAGTCGCGGTGCACCGACGTGACCGCGTCGGACCAGGTCACGCCCCGGTG<br>TAGGCTGGAGCTGCTTCG  |
| f-del-54800     | ATGATGGAAGGCGAACTGGGGGCCTTCTGCGCAGTCGCCGTGAAGCCGTT<br>CCGGGGATCCGTCGACCC   |
| r-del-54800     | TCAGCCGGAGCCGACCGCGCGCAACCCACCTGGTTCACGTTACGCCGGTG<br>TAGGCTGGAGCTGCTTCG   |
| f-del-54820     | TCAGGCCGAGGCGCTGTCCAATCGGGACAGTTCGCCCGCAGTCAGCTCGTT<br>CCGGGGATCCGTCGACCC  |
| r-del-54820     | ATGCGTCCGACTCCGCTGGGCACCGCCGCGCTGGGCACCACCGGGTTGATG<br>TAGGCTGGAGCTGCTTCG  |
| f-del-54830     | TCAGGCGGGGTGCGGCGACCCGGTTCGACCAGATCAGGTGGAACGACAGCT<br>TCCGGGGATCCGTCGACCC |
| r-del-54830     | ATGACAGCCGAGTCCGACCTGCCGTCCCGTGCCGACGTGGGCGCGCTGCTG<br>TAGGCTGGAGCTGCTTCG  |
| f-del-54930     | ATCGAGGACGGCCCCGACCCGCAGGCCACCGAGCGCCAGCACGCCAAGGT<br>TCCGGGGATCCGTCGACCC  |
| r-del-54930     | TCATTGCGGCGGGTTGCCGTGCTTGCGGCTGGGCAGGTCGGCGTGCTTGTGT<br>AGGCTGGAGCTGCTTCG  |
| f-del-54940     | GTGCAAGGTGCATTCTGTGGAGTTGCGATGCGTTGCCGACCGAATACCGGTT<br>CCGGGGATCCGTCGACCC |
| r-del-54940     | CTATTGCCAACTCGACGGGCTGCGGTAGGCCGTAACGCGTTCCGCGCGGTG<br>TAGGCTGGAGCTGCTTCG  |
| f-del-54950     | GTGGTAGGGCAACAAGCCGGTGAGTTAGTCAGCACATGGGAGCCCCGCGCT<br>TCCGGGGATCCGTCGACCC |
| f-del-54950     | TCAGCCCTCGCCGAGGCGGAAACCGACACCGCGAACGGTGACGATCCACT<br>GTAGGCTGGAGCTGCTTCG  |
| f-del-1E5-left  | GTGGTGCCGCTCTCCCTCATAGGTTTGCCAACGACGGCGTCAGTGCGTCTTC<br>CGGGGATCCGTCGACCC  |
| r-del-1E5-left  | CTGGCAGTGCCGGTCTCAGCTCGGCCTCCCTCACCGGCGACGGCTGCCATG<br>TAGGCTGGAGCTGCTTCG  |
| f-del-1E5-right | TCACCACGCTCCAAGGCGGAGCCGGGACGTGCCCGCCGCCACGGCCGCT<br>TCCGGGGATCCGTCGACCC   |
| r-del-1E5-right | TCACGTCACGGTGAGGCGGATGGGTATGCCGAGGCTGGGGTTGCCCGGATG<br>TAGGCTGGAGCTGCTTCG  |
| f-del-54730-chk | TGAACTTCGGGACCTTGACG                                                       |
| r-del-54730-chk | CGATCGACGATCAGCCTCAT                                                       |
| f-del-54740-chk | GGTACAGCCGACCGACAC                                                         |
| r-del-54740-chk | ATCAGCTCGATGGTGCGG                                                         |

|                        |                                                     |
|------------------------|-----------------------------------------------------|
| f-del-54750-chk        | ATGAGGCTGATCGTCGATCG                                |
| r-del-54750-chk        | GTTCTCGGTGCTCTCCTCTG                                |
| f-del-54760-chk        | CGCTGACGGTGTACAAGCA                                 |
| r-del-54760-chk        | TCCCGCATCTCTTTGAGCAG                                |
| f-del-54770+80-<br>chk | TGGACCTCGACATGTTGGTC                                |
| r-del-54770+80-<br>chk | TCCTCTCCTGGGTCCTGTTC                                |
| f-del-54790-chk        | GAACAGGACCCAGGAGAGGA                                |
| r-del-54790-chk        | GTTTCGAGACGATGCAACTGG                               |
| f-del-54800-chk        | TCCCCTACTTCTGGTCGGAC                                |
| r-del-54800-chk        | GTGCTCGGTCATGTCTTCCC                                |
| f-del-54820-chk        | CATCGGCGTTGTCCGAAAC                                 |
| r-del-54820-chk        | GTCGTTCCACCTGATCTGGT                                |
| f-del-54830-chk        | GGTCGTGCAGGTAGTACAGG                                |
| r-del-54830-chk        | GAGTGGGAGTTCTGCGACAA                                |
| f-del-54930-chk        | GAAGGGAGCAGTGCGTGAA                                 |
| r-del-54930-chk        | CTTCTCCACCAGAACCTCCG                                |
| f-del-54940-chk        | TGGTCCGGCAGTACAAAGAC                                |
| r-del-54940-chk        | TTTTCCGGTGTTCATGACGGT                               |
| f-del-54950-chk        | TGCGGTTCACTCTTGAGC                                  |
| r-del-54950-chk        | ATGTGGATGACTGCCCGTG                                 |
| f-chk-1E5-le-int       | GATCGCCATTGTGTCCGTTG                                |
| r-chk-1E5-le-int       | CATCTCGATCACTCCCACGG                                |
| f-chk-1E5-ri-int       | TCACAAGGCACCTTACGGAC                                |
| r-chk-1E5-ri-int       | CATCAGCGAAATCACTGCCG                                |
| f-chk-1E5_ri           | CTCCGGGAAGTGATACTCGC                                |
| r-chk-1E5_ri           | GACGTTCTCCTCAGGTGACG                                |
| f-chk-1E5_le           | CACTCGACGTCCAACCTGTCA                               |
| r-chk-1E5_le           | GAGTGCCGCGGATATCTGAA                                |
| F-54800A3OE            | AAAAAAAGGTACCTAGCAGGGCTCCAAAACCTAACGCCTGATGTAGGATCA |
|                        | GATGAAAAAAAAAAAAAGGAGGAAAATACATATGATGGAAGGCGAACTGGG |
| R-54800A3OE            | AAAAAAAAGCTTTCAGCCGGAGCCGACCGCGCGCAACCCACCTGGTTC    |
|                        | ACGTT                                               |
| F-54950A3OE            | AAAAAAAGGTACCTAGCAGGGCTCCAAAACCTAACGCCTGATGTAGGATCA |
|                        | GATGAAAAAAAAAAAAAGGAGGAAAATACATGTGGTAGGGCAACAAGCC   |
| R-54950A3OE            | AAAAAAAAGCTTTGTGGGTGTTCCACTCCCGA                    |

---

Table S 2 Strains, Plasmids and BACs used in this work

| Streptomyces                                   | Characteristics                                                                                                              | Reference                    |
|------------------------------------------------|------------------------------------------------------------------------------------------------------------------------------|------------------------------|
| <i>S. albus</i> J1074                          | <i>S. albus</i> G1 (DSM 41398) derivative with the defective <i>SalG</i> I restriction modification system heterologous host | (Chater and Wilde, 1980 [1]) |
| <i>Streptomyces lividans</i> Δ6                | <i>S. lividans</i> TK24 derivative, deletion of 6 BGCs                                                                       | (Paper in Revision)          |
| <i>Saccharothrix espanaensis</i> DSM 44229 (T) | Producer of Saccharomicins                                                                                                   | Labeda et al.[2]             |
| E. coli                                        | Characteristics                                                                                                              | Reference                    |
| GB2005                                         | General cloning host                                                                                                         | Wang et al., 2006[3]         |
| ET12567 pUZ8002                                | Strain used for intergeneric conjugation,                                                                                    | Kieser 2000[4]               |
| GB2005-red-rham                                | GB2005, RhamC-BAD-γbaA used for Red/ET                                                                                       | Strochlic et al., 2010[5]    |
| Plasmids                                       | Characteristics                                                                                                              | Reference                    |
| psmart-BAC-S                                   | Apr <sup>R</sup> ; BAC Vector                                                                                                | Lucigen                      |
| pTOS                                           | Apr <sup>R</sup> ; VWB-based <i>Streptomyces</i> integrative vector                                                          | Herrmann et al. (2012)[6]    |
| pTOS_A3_R1                                     | pTOS derivative; Integrated Gene 54800, influenced by A3 promotor cloned into the Kpn I and Hind III site                    | This work                    |
| pTOS_A3_R2                                     | pTOS derivative; Integrated Gene 54950, influenced by A3 promotor cloned into the Kpn I and Hind III site                    | This work                    |
| patt-shyg                                      | <i>Swa</i> I/ <i>EcoR</i> V fragment of phyg-OK containing hyg cloned into the <i>EcoR</i> V site of patt                    | Myronovskiy et al. [7]       |
| BACs                                           | Characteristics                                                                                                              | Reference                    |
| pSMART-BAC-S-1C15                              | pSMART-BAC-S derivative containing a fragment of the <i>S. espanaensis</i> chromosome (Locus in bp: 1,670,099-1,769,322)     | Intact genomics              |
| pSMART-BAC-S-3A24                              | pSMART-BAC-S derivative containing a fragment of the <i>S. espanaensis</i> chromosome (Locus in bp: 2,190,390-2,280,022)     | Intact genomics              |
| pSMART-BAC-S-3E7                               | pSMART-BAC-S derivative containing a fragment of the <i>S. espanaensis</i> chromosome (Locus in bp: 2,332,949-2,404,154)     | Intact genomics              |
| pSMART-BAC-S-1G5                               | pSMART-BAC-S derivative containing a fragment of the <i>S. espanaensis</i> chromosome (Locus in bp: 2,825,657-2,924,398)     | Intact genomics              |
| pSMART-BAC-S-1F6                               | pSMART-BAC-S derivative containing a fragment of the <i>S. espanaensis</i> chromosome (Locus in bp: 3,429,623-3,516,631)     | Intact genomics              |
| pSMART-BAC-S-1I20                              | pSMART-BAC-S derivative containing a fragment of the <i>S. espanaensis</i> chromosome (Locus in bp: 3,577,211-3,660,078)     | Intact genomics              |
| pSMART-BAC-S-3E19                              | pSMART-BAC-S derivative containing a fragment of the <i>S. espanaensis</i> chromosome (Locus in bp: 3,526,632-3,686,841)     | Intact genomics              |
| pSMART-BAC-S-3K5                               | pSMART-BAC-S derivative containing a fragment of the <i>S. espanaensis</i> chromosome (Locus in bp: 3,786,071-3,893,910)     | Intact genomics              |



|                   |                                                                                                                                     |                 |
|-------------------|-------------------------------------------------------------------------------------------------------------------------------------|-----------------|
| pSMART-BAC-S-1G11 | pSMART-BAC-S derivative containing a fragment of the <i>S. espanaensis</i> chromosome (Locus in bp: 4,412,386-4,533,983)            | Intact genomics |
| pSMART-BAC-S-3C18 | pSMART-BAC-S derivative containing a fragment of the <i>S. espanaensis</i> chromosome (Locus in bp: 4,412,386-4,533,983)            | Intact genomics |
| pSMART-BAC-S-1L8  | pSMART-BAC-S derivative containing a fragment of the <i>S. espanaensis</i> chromosome (Locus in bp: 5,681,922-5,790,602)            | Intact genomics |
| pSMART-BAC-S-3M21 | pSMART-BAC-S derivative containing a fragment of the <i>S. espanaensis</i> chromosome (Locus in bp: 5,865,637-5,963,104)            | Intact genomics |
| pSMART-BAC-S-1E5  | pSMART-BAC-S derivative containing a fragment of the <i>S. espanaensis</i> chromosome (Locus in bp: 6,074,530-6,190,776)            | Intact genomics |
| pSMART-BAC-S-1C7  | pSMART-BAC-S derivative containing a fragment of the <i>S. espanaensis</i> chromosome (Locus in bp: 6,252,700-6,375,967)            | Intact genomics |
| pSMART-BAC-S-3K17 | pSMART-BAC-S derivative containing a fragment of the <i>S. espanaensis</i> chromosome (Locus in bp: 6,511,399-6,617,883)            | Intact genomics |
| 1E5Δ55110         | pSMART-BAC-S-1E5 derivative; Knockout of gene BN6_55110                                                                             | This work       |
| 1E5Δ54860         | pSMART-BAC-S-1E5 derivative; Knockout of gene BN6_54860                                                                             | This work       |
| 1E5ΔpenA          | pSMART-BAC-S-1E5 derivative; Knockout of gene BN6_54730                                                                             | This work       |
| 1E5ΔpenC          | pSMART-BAC-S-1E5 derivative; Knockout of gene BN6_54750                                                                             | This work       |
| 1E5ΔpenD          | pSMART-BAC-S-1E5 derivative; Knockout of gene BN6_54760                                                                             | This work       |
| 1E5ΔpenE/F        | pSMART-BAC-S-1E5 derivative; Knockout of gene BN6_54770 & BN6_54780                                                                 | This work       |
| 1E5ΔpenG          | pSMART-BAC-S-1E5 derivative; Knockout of gene BN6_54790                                                                             | This work       |
| 1E5ΔpenR1         | pSMART-BAC-S-1E5 derivative; Knockout of gene BN6_54800                                                                             | This work       |
| 1E5ΔpenI          | pSMART-BAC-S-1E5 derivative; Knockout of gene BN6_54820                                                                             | This work       |
| 1E5ΔpenJ          | pSMART-BAC-S-1E5 derivative; Knockout of gene BN6_54830                                                                             | This work       |
| 1E5ΔpenV          | pSMART-BAC-S-1E5 derivative; Knockout of gene BN6_54940                                                                             | This work       |
| 1E5ΔpenR2         | pSMART-BAC-S-1E5 derivative; Knockout of gene BN6_54950                                                                             | This work       |
| 1E5Δleft          | pSMART-BAC-S-1E5 derivative; Deletion of left flanking region (Deletion locus in bp: 6,079,768 - 6,123,914; Deletion of 44,147 bp)  | This work       |
| 1E5Δright         | pSMART-BAC-S-1E5 derivative; Deletion of right flanking region (Deletion locus in bp: 6,148,356 - 6,184,748; Deletion of 36,393 bp) | This work       |

---

Table S 3 Preparative HPLC method for pentangumycin (CMP468) & SEK90 (CMP791); 20 mL/min flow rate

| Method for 1 |    |    | Method for 2 |    |    | Waters AutoPurification System                        |
|--------------|----|----|--------------|----|----|-------------------------------------------------------|
| Min.         | %A | %B | Min.         | %A | %B |                                                       |
| 0            | 95 | 5  | 0            | 95 | 5  | Waters 2545 Binary Gradient module                    |
| 2            | 95 | 5  | 2            | 95 | 5  | Waters SFO (System Fluidics organizer)                |
| 16           | 3  | 97 | 16           | 3  | 97 | Waters 2998 PAD (Photodiode array Detector)           |
| 17           | 3  | 97 | 20           | 3  | 97 | Waters SQ-Detector-2                                  |
| 18           | 95 | 5  | 21           | 95 | 5  | Waters 2767 Sample Manager                            |
| 19           | 95 | 5  | 22           | 95 | 5  | Nucleodur C18 Htec 250/4,6 C18 5 $\mu$ M (analytical) |
|              |    |    |              |    |    | Nucleodur C18 Htec 250/21 C18 5 $\mu$ M (preparative) |

Biosynthetic pathway of pentangumycin; Roman numerals: proposed intermediates; Arabic numerals: intermediates with identified fitting masses after single gene knockouts and overexpression of the regulatory genes; Black pathway: methylation as first biosynthetic step after aromatization; Grey pathway: methylation as last biosynthetic step to complete the formation of pentangumycin (1).

Table S 4 Preparative HPLC method and yield for 8 and 9; Flow Rate: 20mL/min

| Method for 1E5_CMP1 and 1E5_CMP2 |    |    | Waters AutoPurification System                        | Purified compounds |
|----------------------------------|----|----|-------------------------------------------------------|--------------------|
| Min.                             | %A | %B | Waters 2545 Binary Gradient module                    | 8: 6 mg            |
| 0                                | 95 | 5  | Waters SFO (System Fluidics organizer)                | 9: 7 mg            |
| 1                                | 95 | 5  | Waters 2998 PAD (Photodiode array Detector)           |                    |
| 5                                | 50 | 50 | Waters 2767 Sample Manager                            |                    |
| 15                               | 5  | 95 | Nucleodur C18 Htec 250/4,6 C18 5 $\mu$ M (analytical) |                    |
| 19                               | 5  | 95 | Nucleodur C18 Htec 250/21 C18 5 $\mu$ M (preparative) |                    |
| 20                               | 95 | 5  |                                                       |                    |
| 21                               | 95 | 5  |                                                       |                    |

Table S 5 AntiSMASH predicted biosynthetic gene clusters in *S. espanaensis*

| #  | Prediction: <sup>a</sup>               | Predicted Cluster: <sup>b</sup> | Homology: <sup>c</sup> | BAC: <sup>d</sup> | Expressed: <sup>e</sup> |
|----|----------------------------------------|---------------------------------|------------------------|-------------------|-------------------------|
| 1  | Terpene                                | Geosmin                         | 100%                   | known             | No                      |
| 2  | Lanthipeptide                          | Erythreapeptin                  | 75%                    | homology          | No                      |
| 3  | Terpene                                | Isorenieratene                  | 42%                    | ex: 1C15          | No                      |
| 4  | Bacteriocine                           |                                 |                        | known             | No                      |
| 5  | Furan                                  | Asukamycin                      | 30%                    | ex: 3A24          | No                      |
| 6  | NRPS                                   |                                 |                        | ex: 3E7           | No                      |
| 7  | Other                                  | A54145                          | 3%                     | not covered       | No                      |
| 8  | NRPS                                   | Myxochelin                      | 50%                    | ex: 1G5           | No                      |
| 9  | Indole                                 | Frankiamicin                    | 14%                    | ex: 1F6           | No                      |
| 10 | Ladderane, NRPS                        | Skyllamycin                     | 22%                    | ex: 1F6           | No                      |
| 11 | Linear azole containing Peptides       | A201A                           | 6%                     | ex: 1I20          | No                      |
| 12 | Type I PKS                             | Tylactone                       | 6%                     | ex: 3E19          | No                      |
| 13 | NRPS                                   | Tyrobetaine                     | 53%                    | ex: 3K5           | No                      |
| 14 | NRPS                                   |                                 |                        | not covered       | No                      |
| 15 | NRPS, Type I PKS                       | Kedarcidin                      | 18%                    | not covered       | No                      |
| 16 | Lanthipeptide                          | Kinamycin                       | 5%                     | ex: 1G11          | No                      |
| 17 | Oligosaccharide                        | Teicoplanin                     | 4%                     | not covered       | No                      |
| 18 | Melanin                                |                                 |                        | known             | No                      |
| 19 | NRPS, Type I PKS                       | Leinamycin                      | 15%                    | not covered       | No                      |
| 20 | NRPS, Type I PKS                       | Lavendiol                       | 35%                    | ex: 3C18          | Yes                     |
| 21 | Terpene                                | Isorenieratene                  | 85%                    | homology          | No                      |
| 22 | NRPS                                   | Cyclomarin                      | 13%                    | ex: 1L8           | No                      |
| 23 | Aminoglycoside                         |                                 |                        | ex: 3M21          | No                      |
| 24 | NRPS                                   | Ficellomycin                    | 3%                     | ex: 3M21          | No                      |
| 25 | RIPP                                   | Anantin C                       | 75%                    | homology          | No                      |
| 26 | Terpene, Type II PKS, Type I PKS, NRPS | Fluostatin                      | 23%                    | ex: 1E5           | Yes                     |
| 27 | terpene, NRPS, T1PKS                   | Ficellomycin                    | 27%                    | ex: 1C7           | No                      |
| 28 | Oligosaccharide                        | Desosamine                      | 22%                    | ex: 3K17          | No                      |
| 29 | Terpene                                |                                 |                        | excluded          | No                      |
| 30 | Terpene                                | SF2575                          | 6%                     | excluded          | No                      |
| 31 | Lanthipeptide                          | Olimycin A                      | 8%                     | excluded          | No                      |

a: Prediction: Predicted class of BGC;

b: Predicted cluster: Cluster with the highest homology;

c: Homology: Homology between the predicted cluster and the BGC identified in the genome of *S. espanaensis*;

d: Work: known: Cluster was known and excluded; homology: due to high homology of the whole cluster, the cluster was excluded; not covered: Cluster was not covered by our library; ex: "XXX" Cluster was covered by the BAC "XXX" and chosen for expression in our host;

e: Expressed: Indication of successful expression in our heterologous hosts

Table S 6 NMR spectroscopic data of 1E5\_CMP1 (CDCl<sub>3</sub>)

| 1E5_CMP1   |            |                                  |      |
|------------|------------|----------------------------------|------|
| Pos.       | $\delta_C$ | $\delta_H$ , m ( <i>J</i> in Hz) | HMBC |
| 1 & 1'     | 129,6      | 7,22 m                           | -    |
| 2 & 2'     | 128,8      | 7,33 m                           | -    |
| 3 & 3'     | 127,6      | 7,28 m                           | -    |
| 4 & 4'     | 120,8      | 5,90 s                           | -    |
| 5 & 5'     | 39,7       | 3,71 s                           | -    |
| 6          | 18,75      | 3,48 s                           | -    |
| OH1 & OH1' | -          | 10,69 s                          | -    |

Table S 7 NMR spectroscopic data of 1E5\_CMP2 (CDCl<sub>3</sub>)

| 1E5_CMP2 |            |                                  |                           |
|----------|------------|----------------------------------|---------------------------|
| Pos.     | $\delta_c$ | $\delta_H$ , m ( <i>J</i> in Hz) | HMBC                      |
| 1 & 1'   | 170,29     | -                                | -                         |
| 2 & 2'   | 168,58     | -                                | -                         |
| 3 & 3'   | 163,33     | -                                | -                         |
| 4 & 4'   | 134,5      | -                                | -                         |
| 5 & 5'   | 129,23     | 7,22 m                           | C-10                      |
| 6 & 6'   | 128,86     | 7,33 m                           | C-4                       |
| 7 & 7'   | 127,44     | 7,28 m                           | C-5                       |
| 8 & 8'   | 104,95     | -                                | -                         |
| 9 & 9'   | 102,83     | 5,86 m                           | C-10, C-8, C-3, C-2       |
| 10 & 10' | 39,8       | 3,76 d (7,1 Hz)                  | C-9, C-5, C-4, C-3        |
| 11       | 31,42      | 4,13 t (7,6 Hz)                  | C-13, C-12, C-8, C-2, C-1 |
| 12       | 30,13      | 2,16 m                           | C-14, C-13, C-11, C-8     |
| 13       | 21,83      | 1,25 m                           | C-14, C-12, C-11          |
| 14       | 13,74      | 0,90 t (7,4 Hz)                  | C-13, C-12                |
| OH1      | -          | 11,37 s                          | -                         |
| OH1'     | -          | 10,55 s (br)                     | -                         |

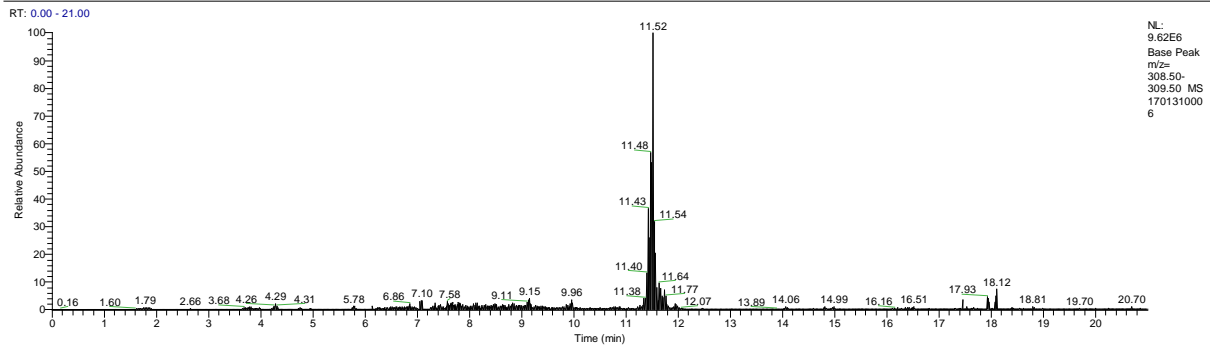

1701310006 #936-959 RT: 11.38-11.64 AV: 12 NL: 2.90E6

T: FTMS + c ESI Full ms [200.00-2000.00]

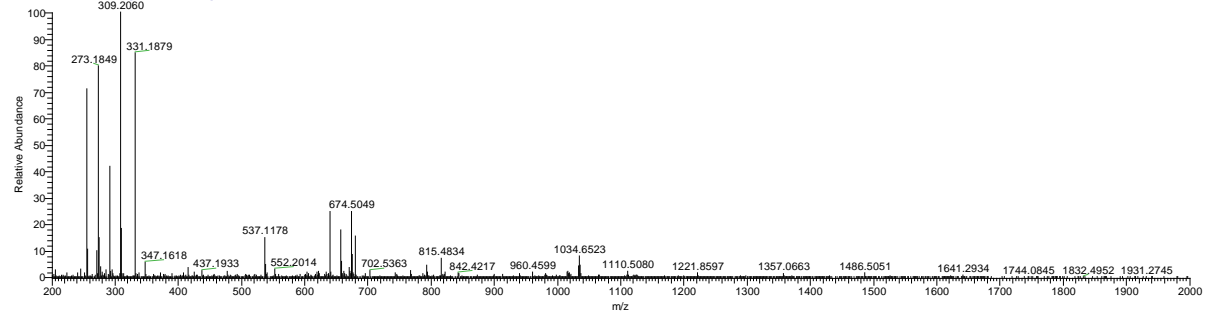

Figure S 1 HPLC-MS Extracted ion chromatogram (Extracted mass  $309 \pm 0.5$ ) of *S. lividans*  $\Delta$ YA6\_3C18 and the corresponding mass chromatogram

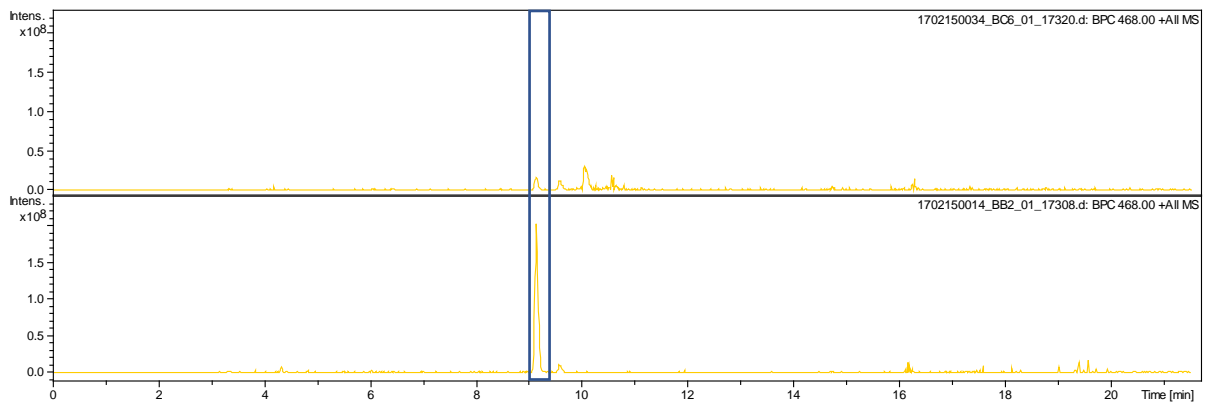

Figure S2 HPLC-MS Extracted ion chromatogram (Extracted mass  $468 \pm 0.5$ ) of *S. albus* J1074\_1E5 (up) and *S. lividans*  $\Delta 6$ \_1E5 (down)



RT: 0.00 - 23.01

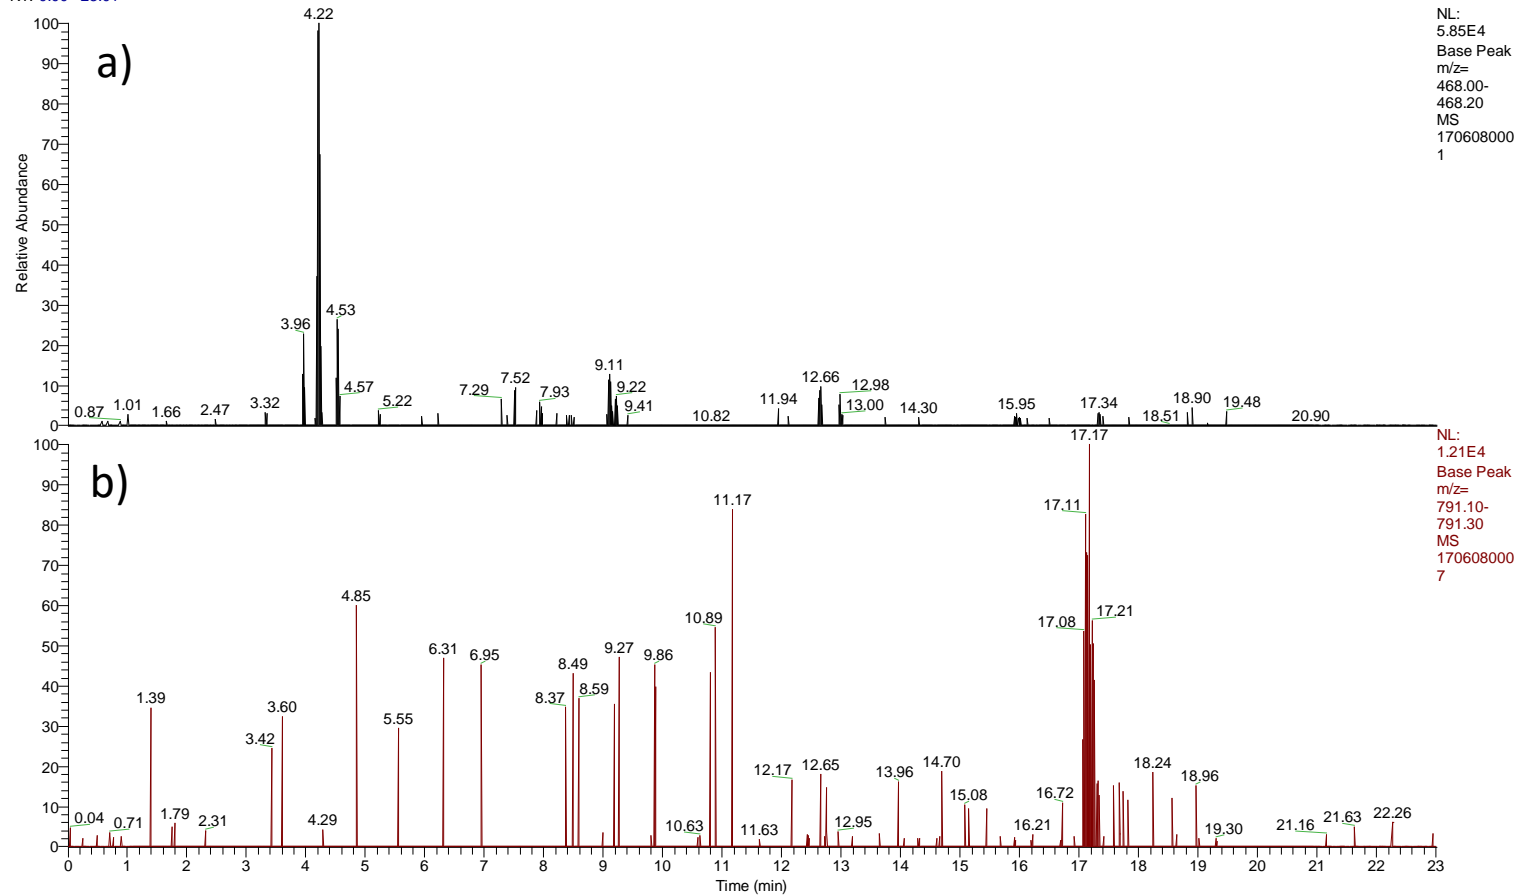

Figure S 3 HPLC-MS Extracted ion chromatogram; a) Extracted mass 468.00 – 468.20, Ethyl acetate extract of *S. espanaensis* grown in SG Medium; b) Extracted mass 791.10 – 791.30; Butanol extract of *S. espanaensis* grown in SG Medium

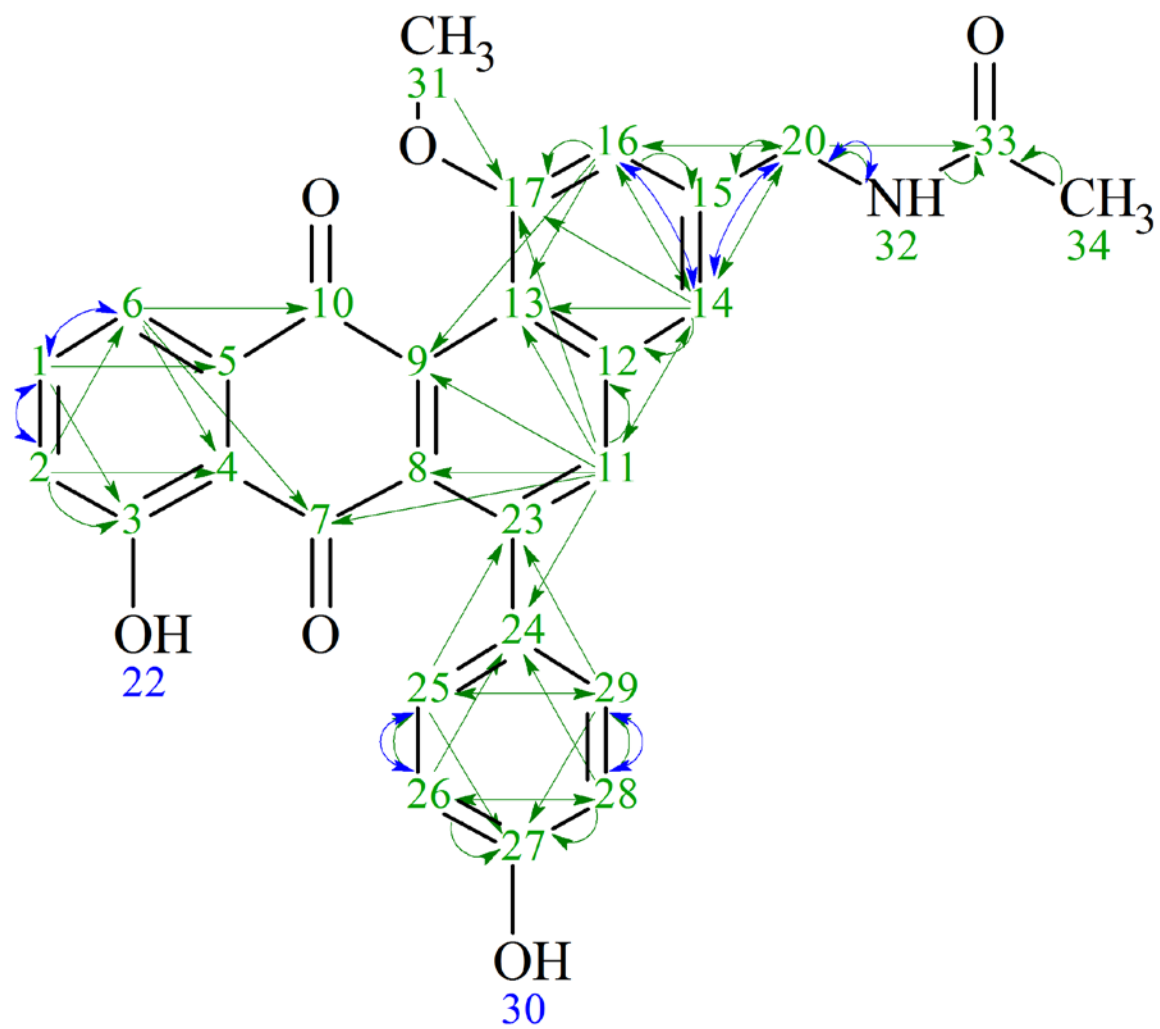

Figure S 4 Structure of Pentangumycin with all correlations (green: HMBC correlations H → C; blue: <sup>1</sup>H-<sup>1</sup>H-Cosy correlation)

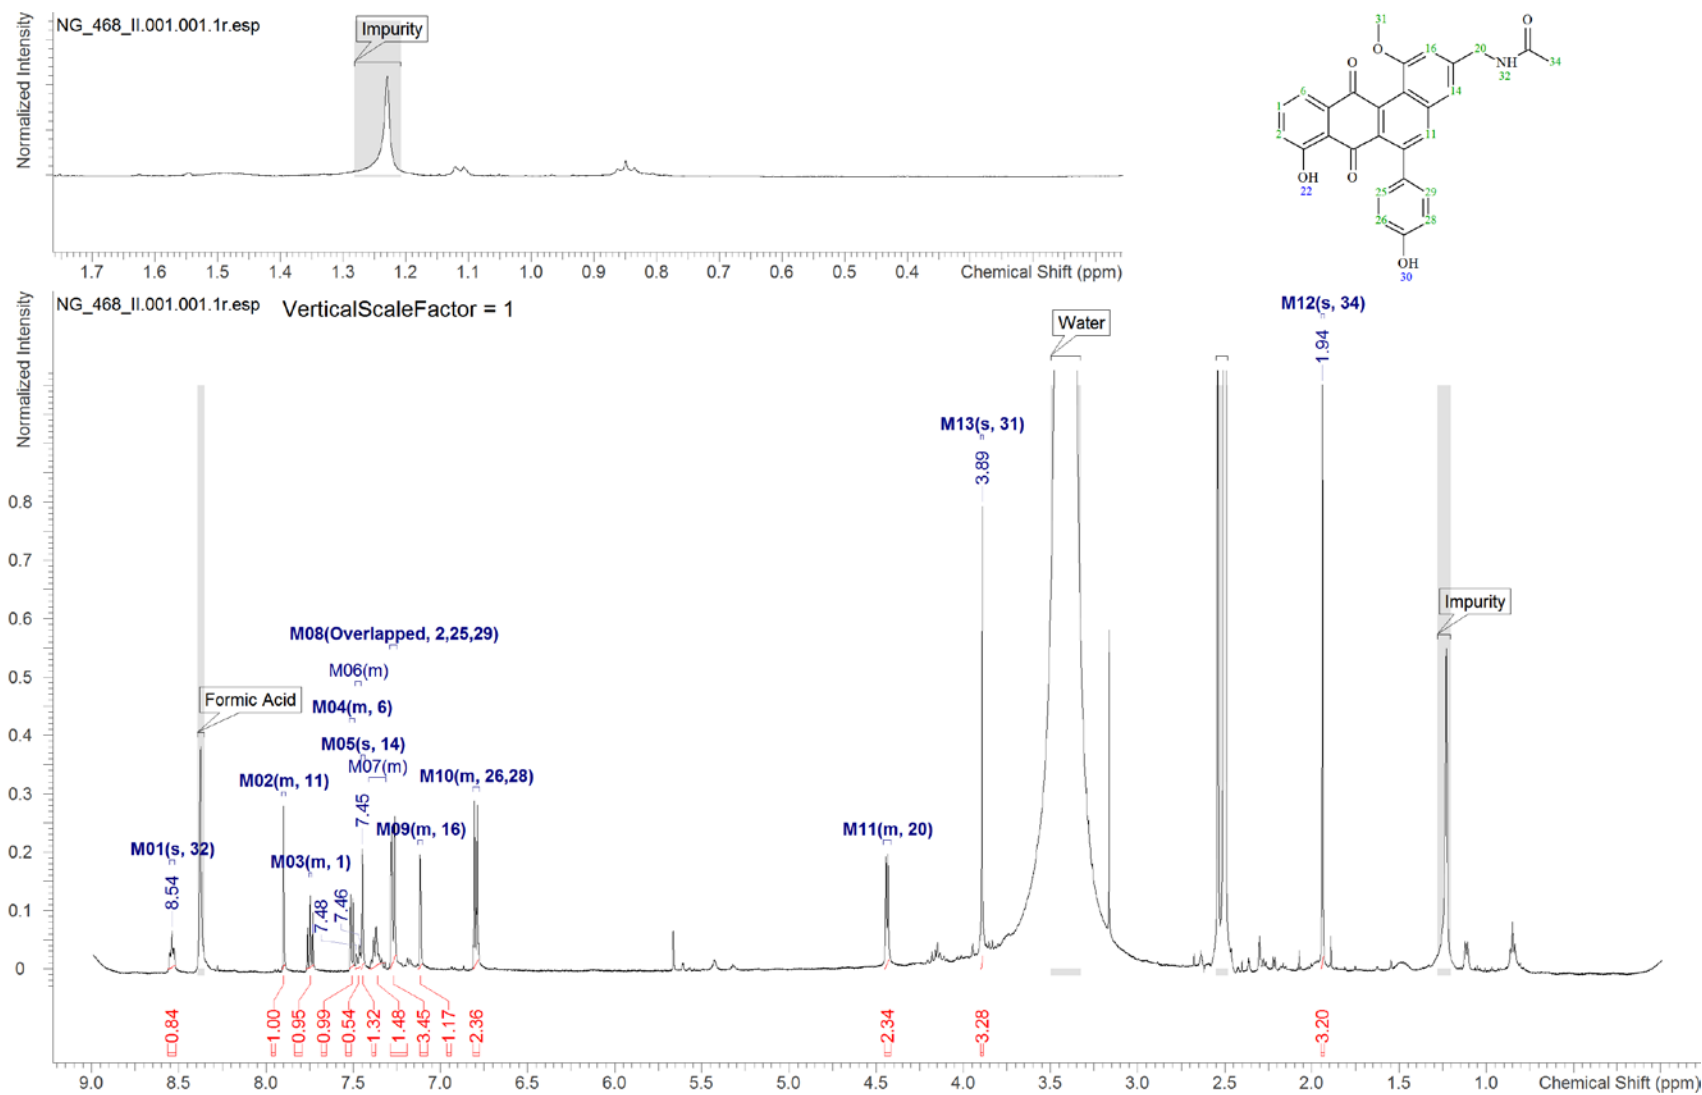

Figure S 5  $^1\text{H-NMR}$  spectrum (500 MHz,  $\text{DMSO-d}_6$ ) of Pentangumycin; complete Spectrum and zoom from 1.7 to 0.1 ppm

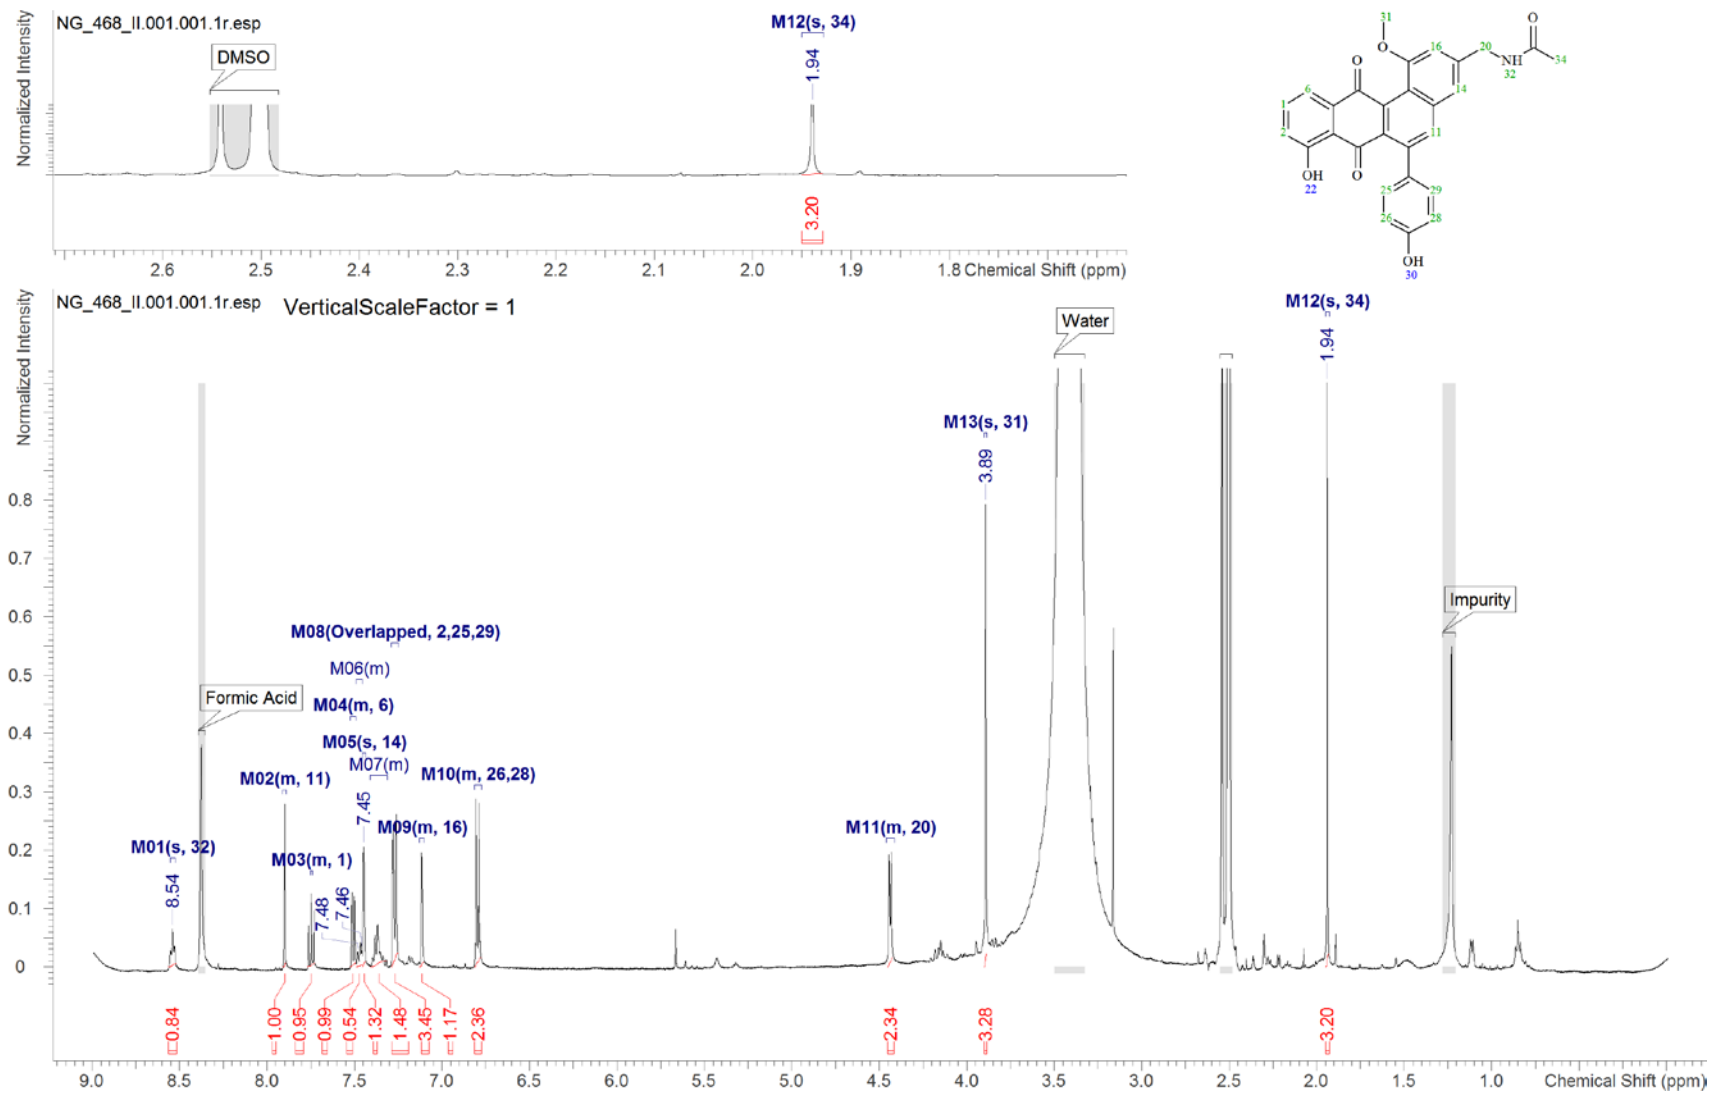

Figure S 6  $^1\text{H-NMR}$  spectrum (500 MHz,  $\text{DMSO-d}_6$ ) of Pentangumycin; complete Spectrum and zoom from 2.7 to 1.7 ppm

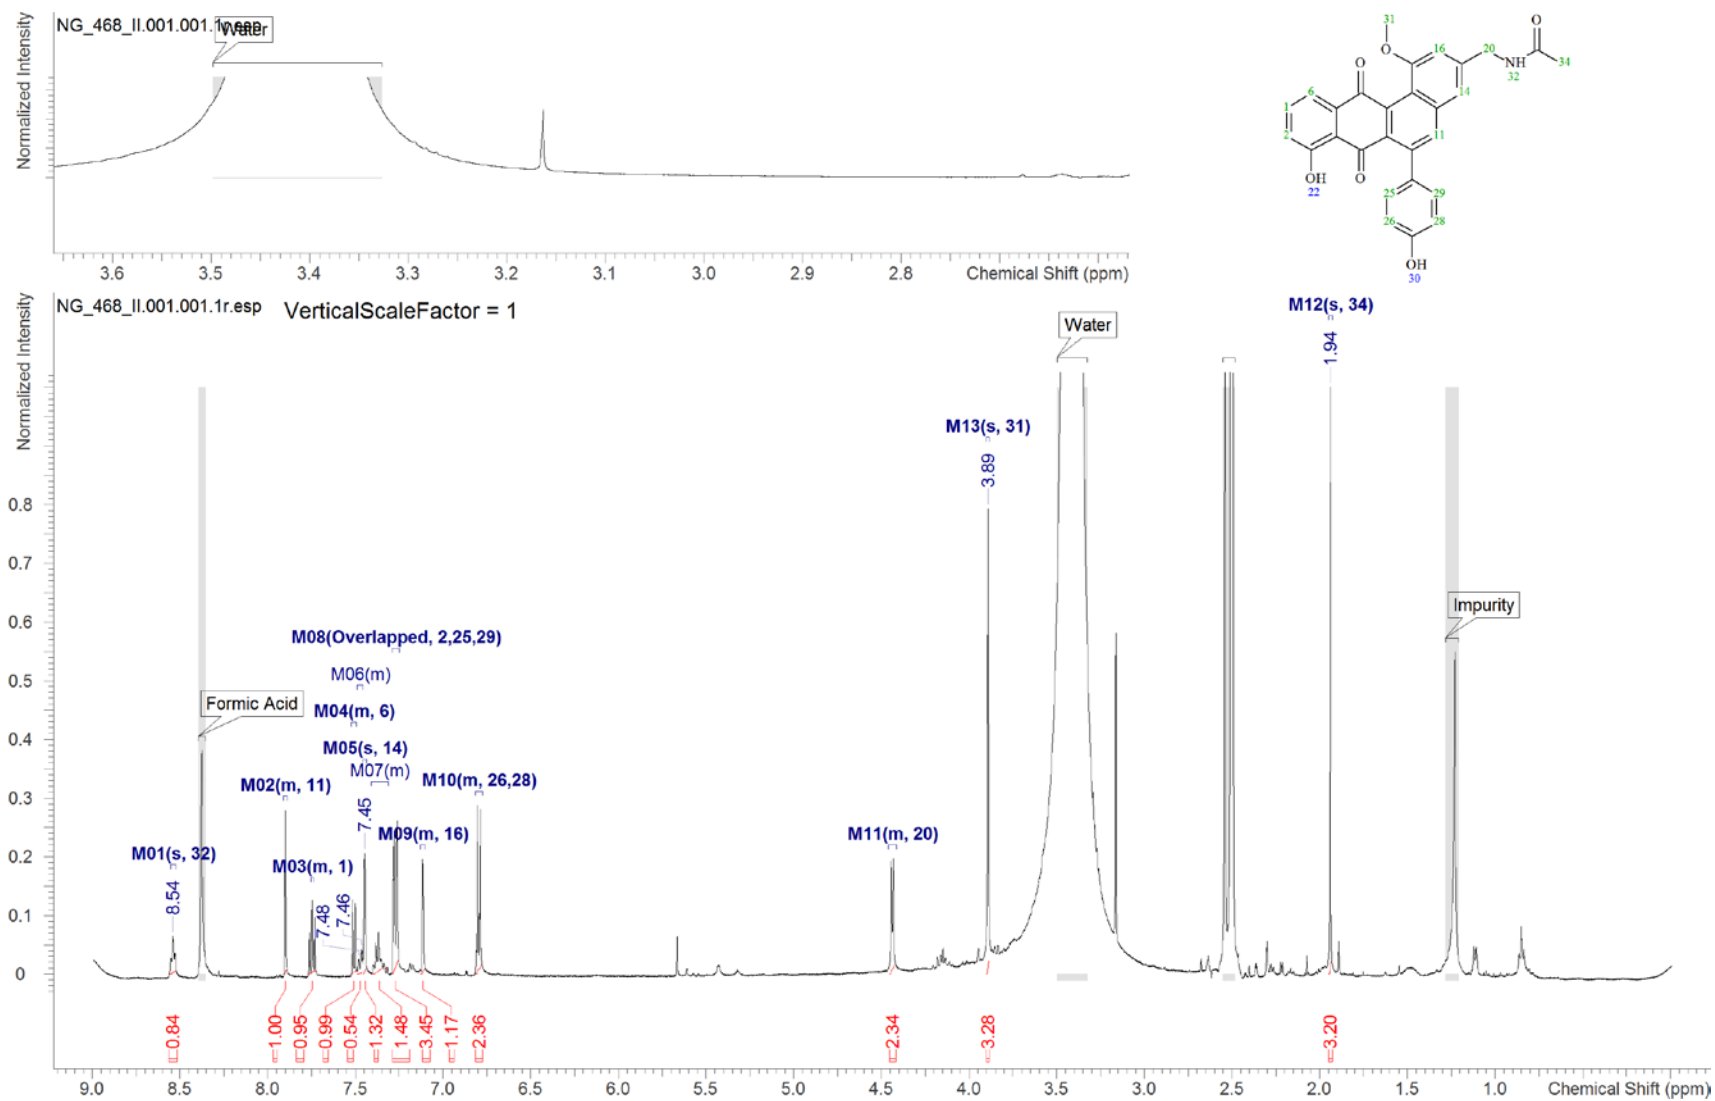

Figure S 7  $^1\text{H-NMR}$  spectrum (500 MHz,  $\text{DMSO-d}_6$ ) of Pentangumycin; complete Spectrum and zoom from 3.65 to 2.65 ppm

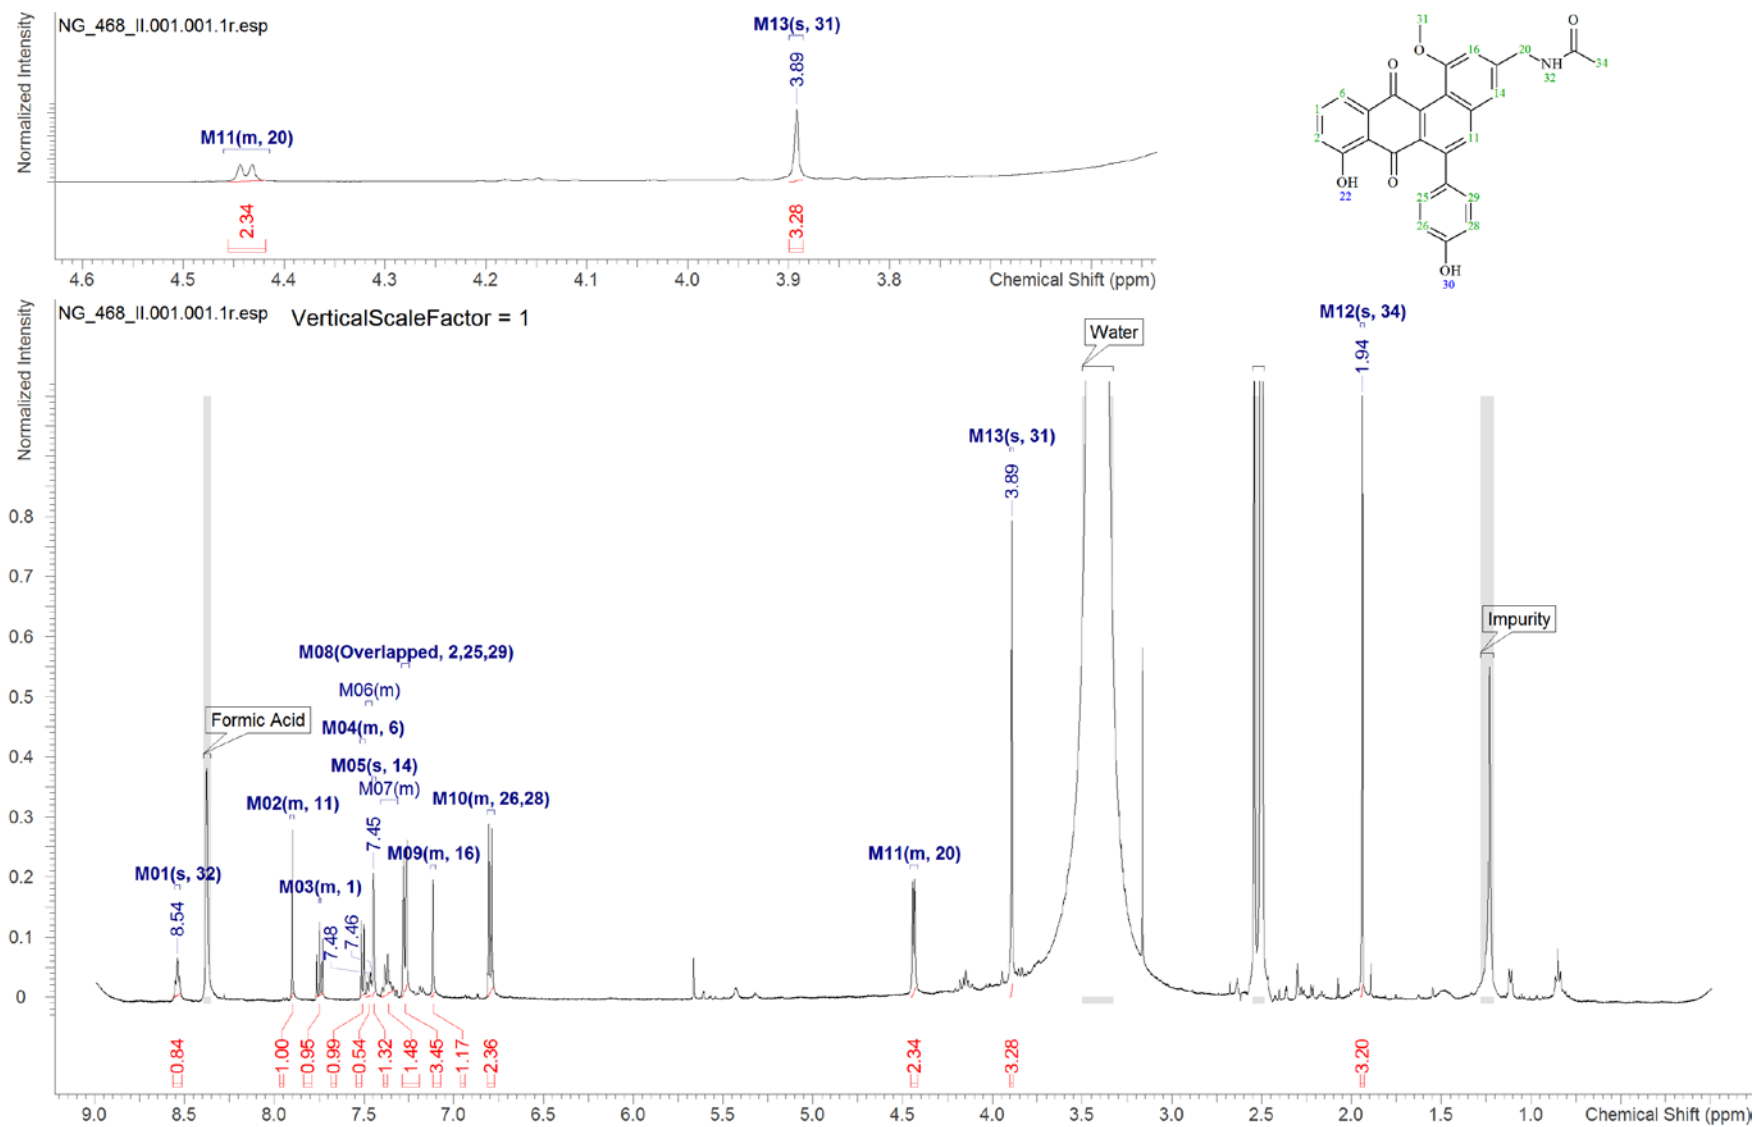

Figure S 8  $^1\text{H-NMR}$  spectrum (500 MHz,  $\text{DMSO-d}_6$ ) of Pentangumycin; complete Spectrum and zoom from 4.6 to 3.6 ppm

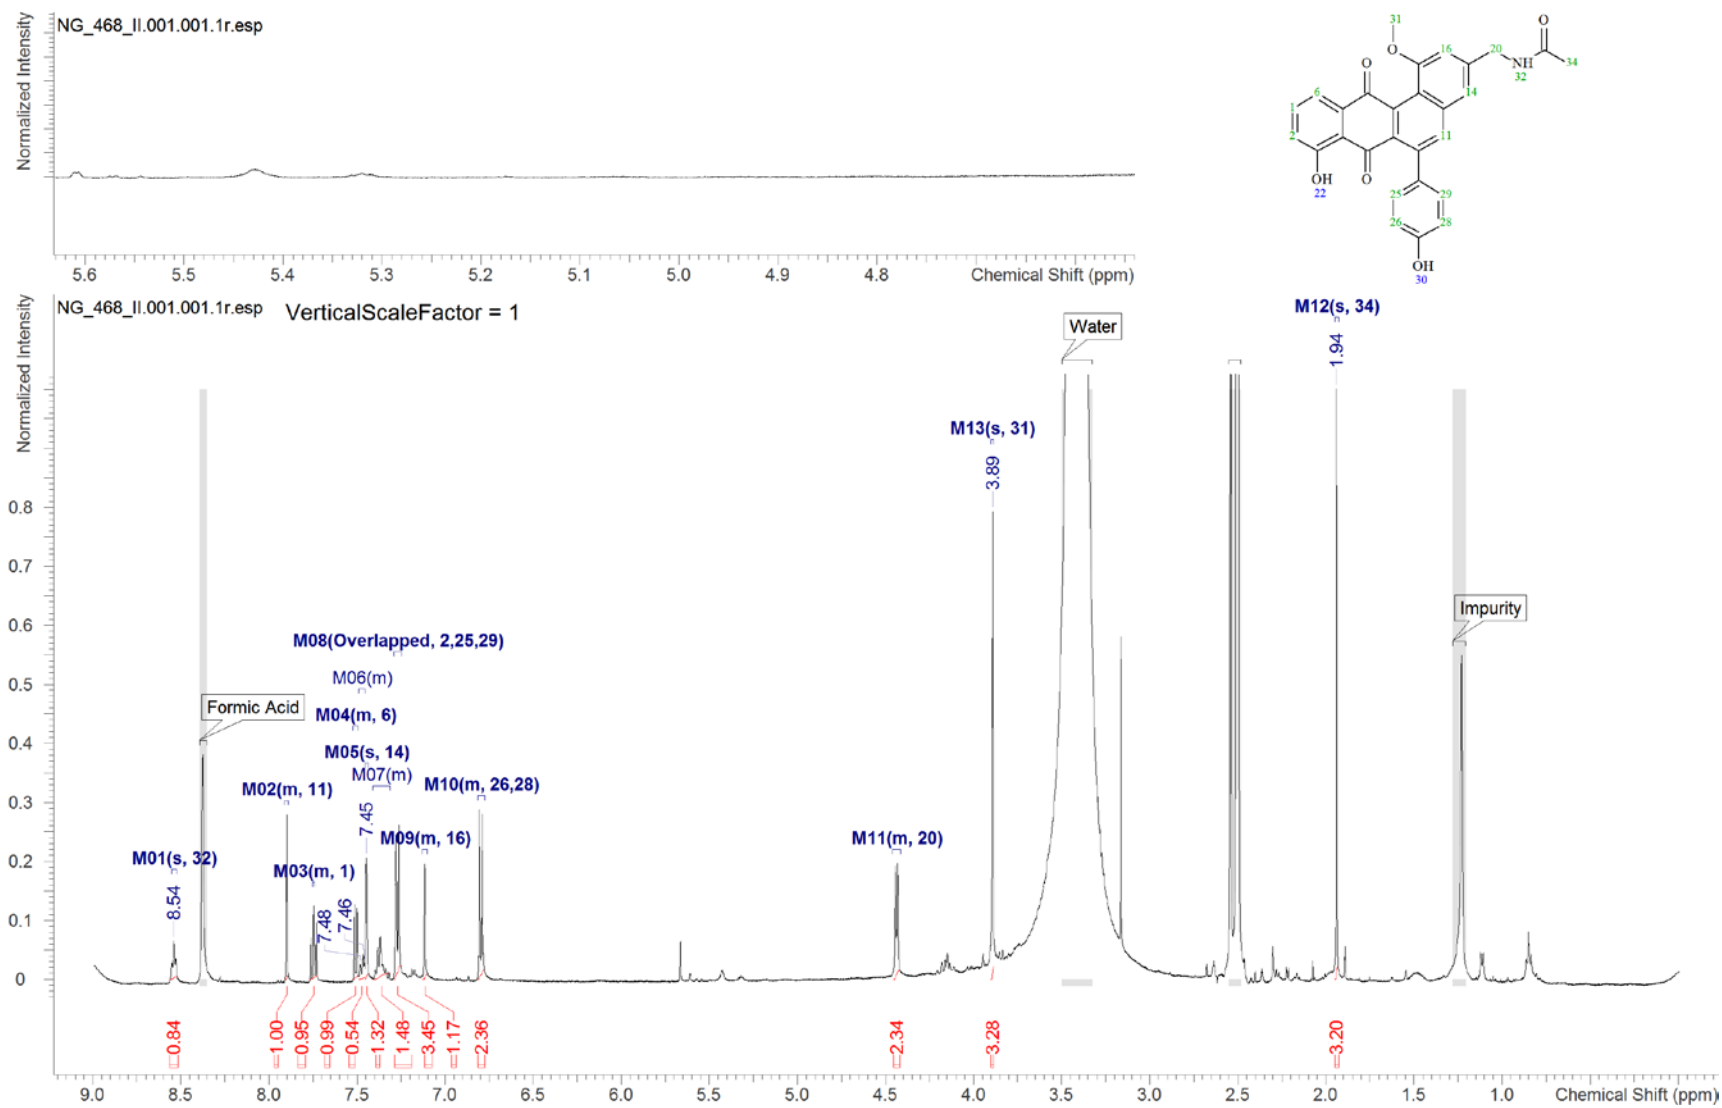

Figure S 9  $^1\text{H-NMR}$  spectrum (500 MHz,  $\text{DMSO-d}_6$ ) of Pentangumycin; complete Spectrum and zoom from 5.6 to 4.6 ppm

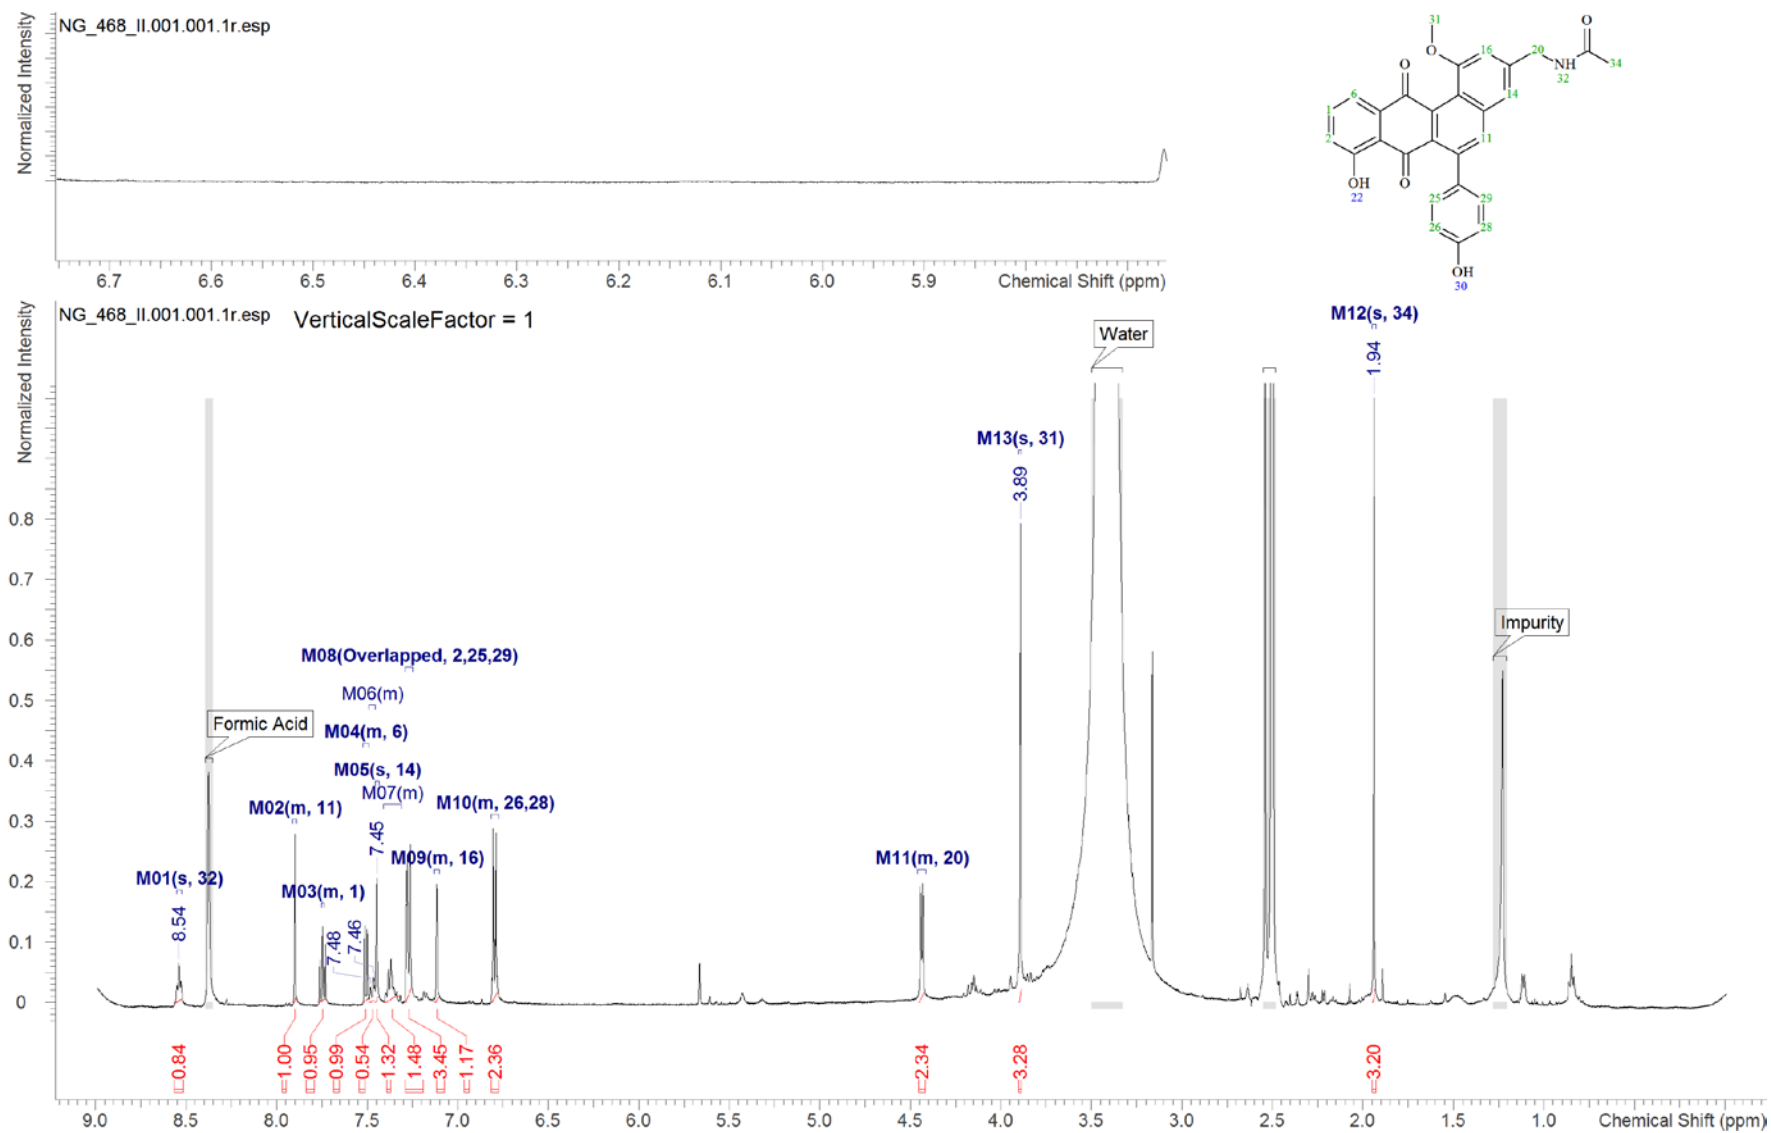

Figure S 10  $^1\text{H-NMR}$  spectrum (500 MHz,  $\text{DMSO-d}_6$ ) of Pentangumycin; complete Spectrum and zoom from 6.7 to 5.7 ppm



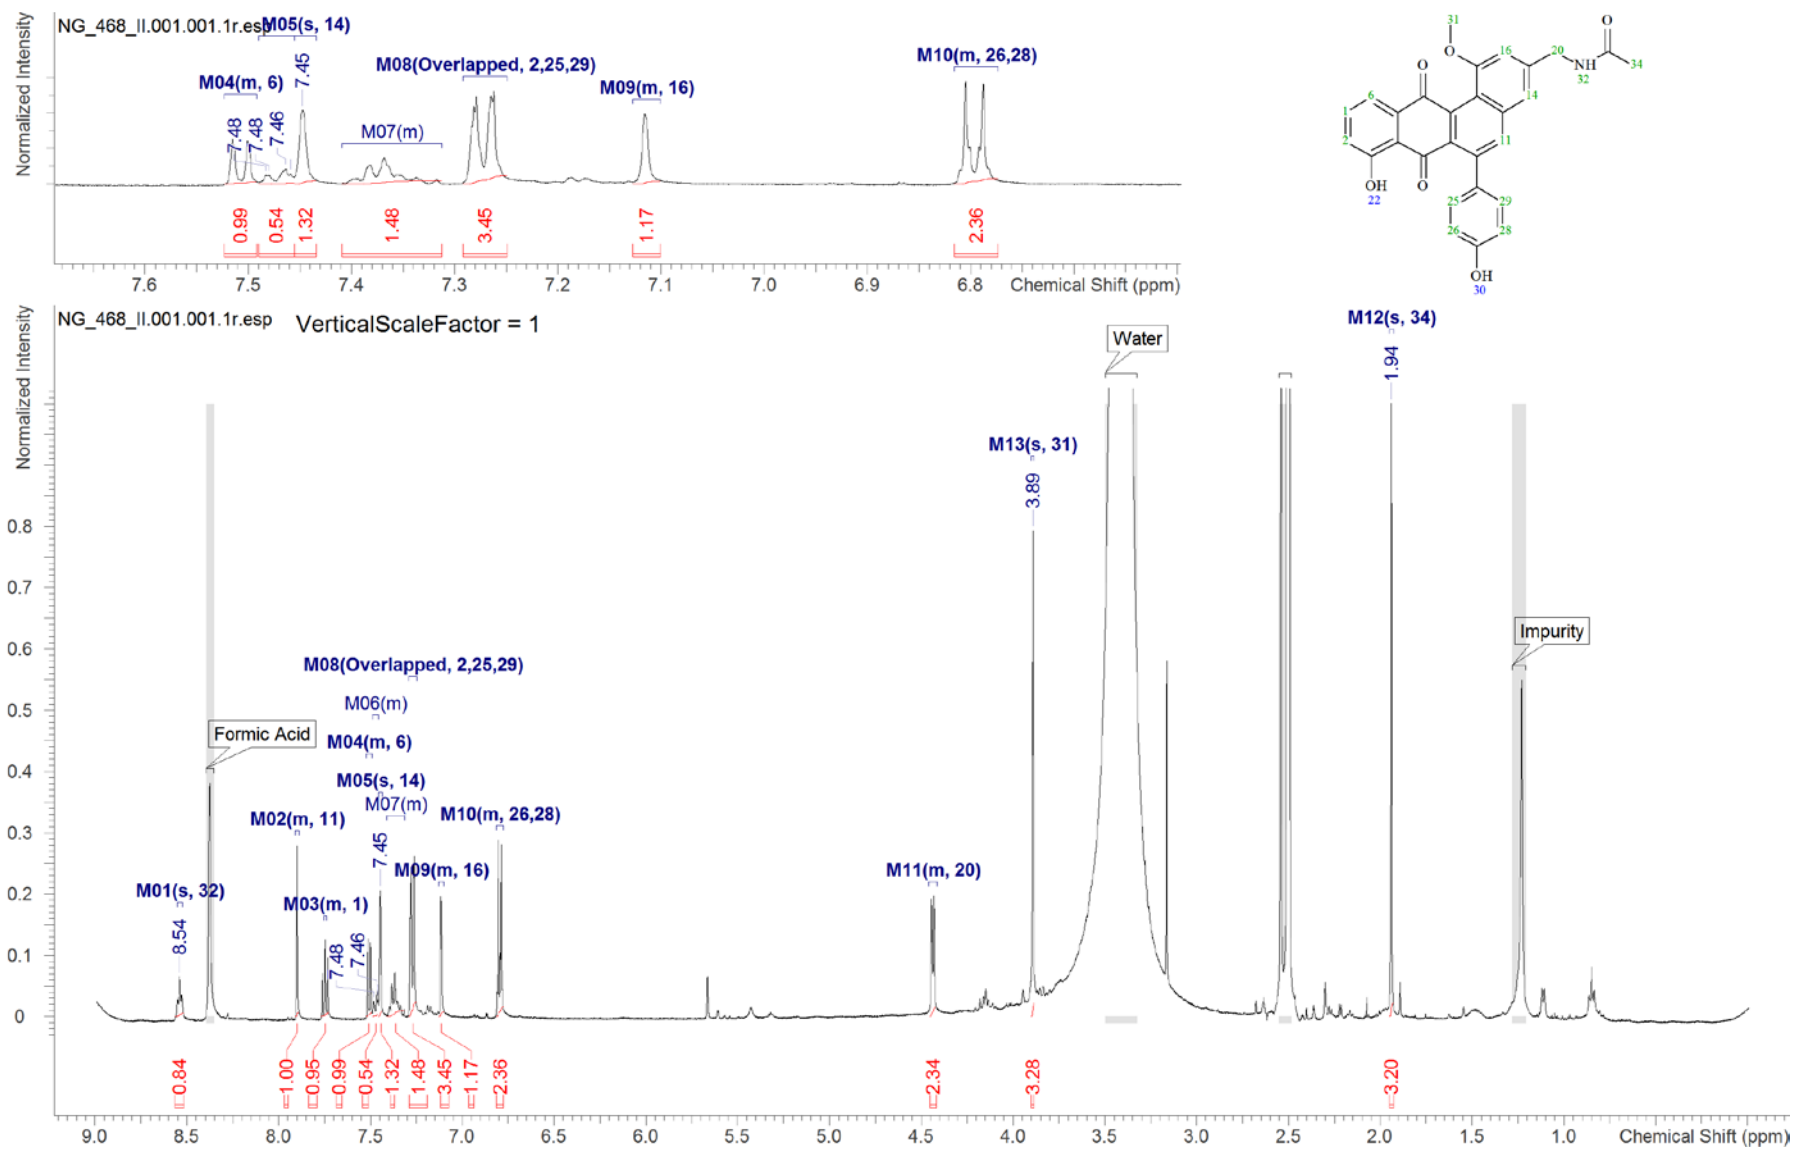

Figure S 11  $^1\text{H-NMR}$  spectrum (500 MHz,  $\text{DMSO-d}_6$ ) of Pentangumycin; complete Spectrum and zoom from 7.6 to 6.7 ppm

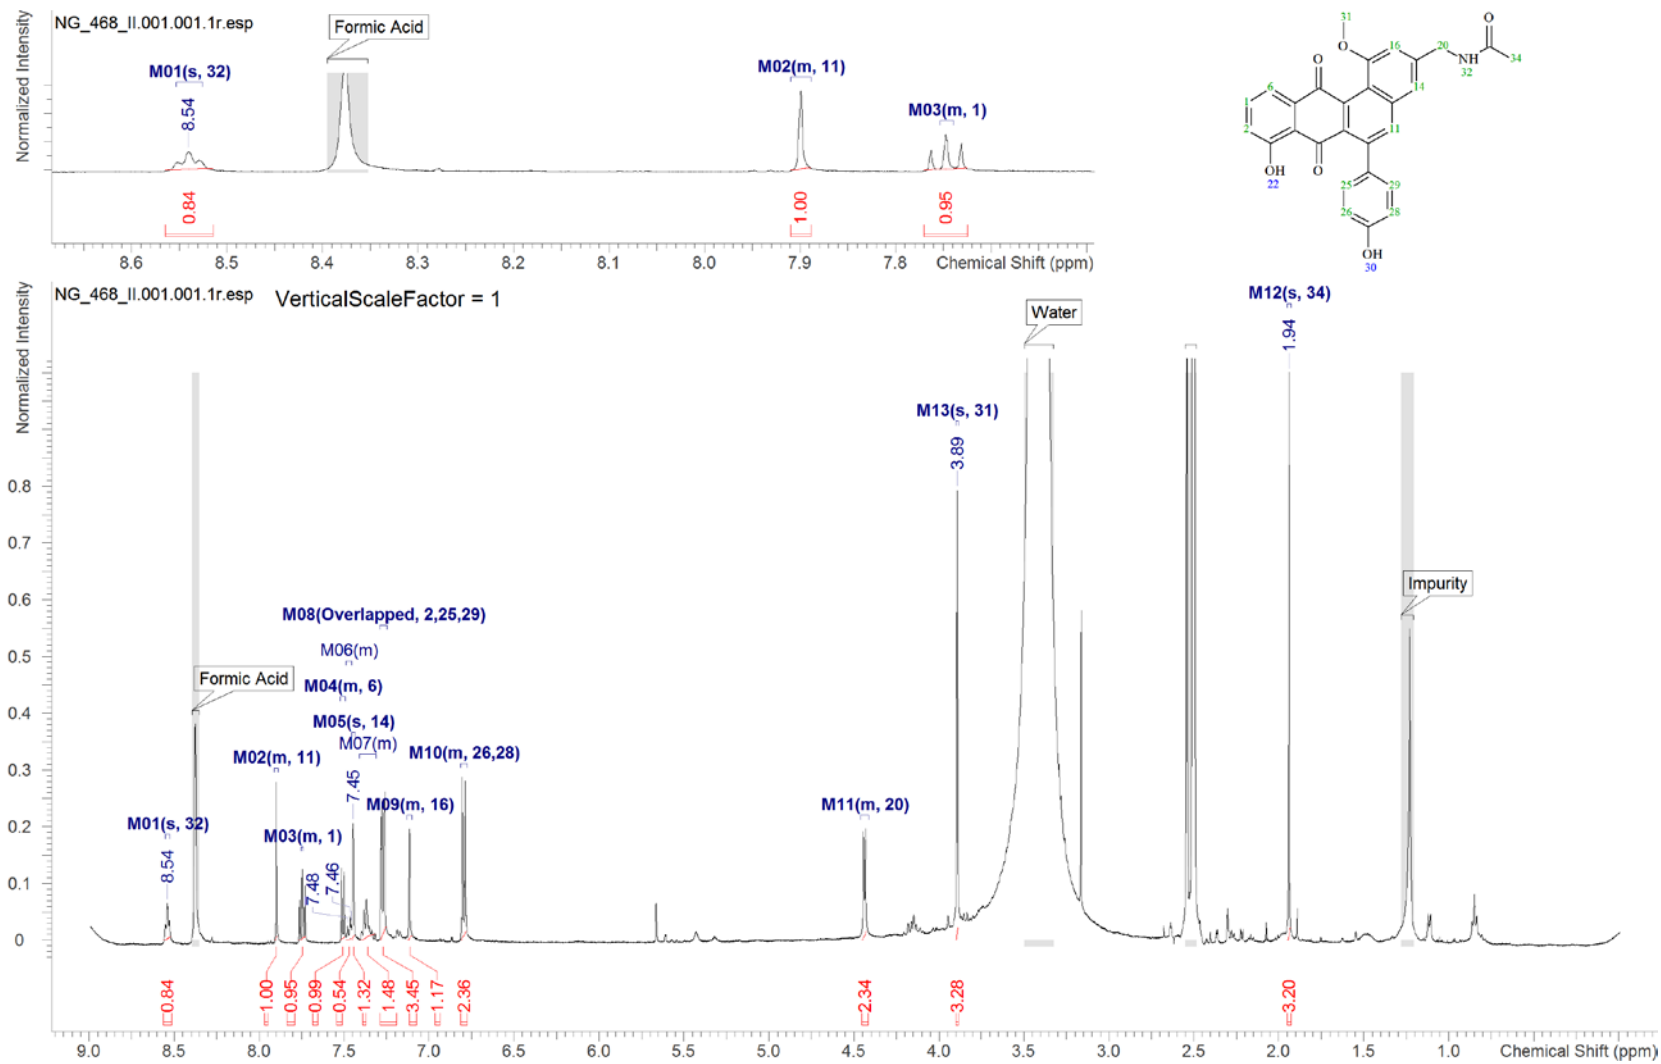

Figure S 12  $^1\text{H-NMR}$  spectrum (500 MHz,  $\text{DMSO-d}_6$ ) of Pentangumycin; complete Spectrum and zoom from 7.6 to 6.7 ppm

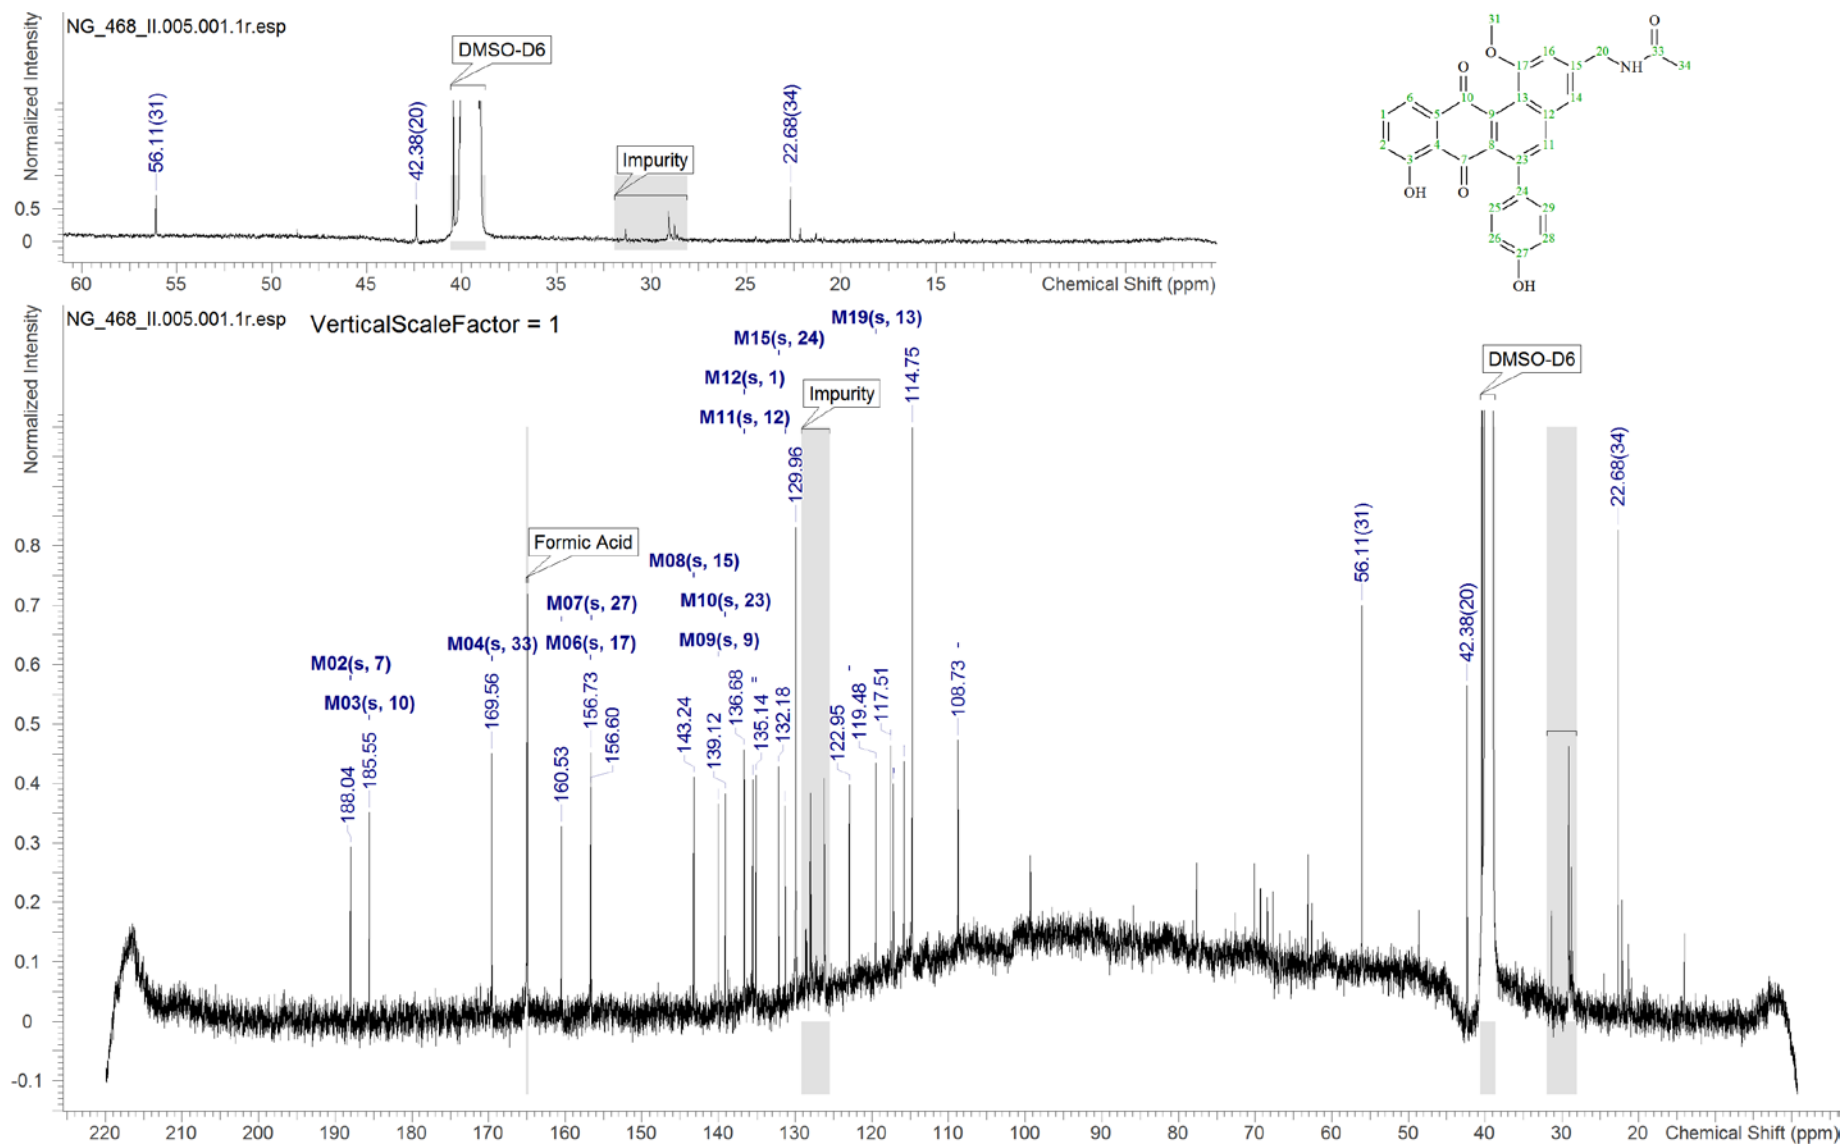

Figure S 13 <sup>13</sup>C-NMR (125 MHz, DMSO- d<sub>6</sub>) of Pentangumycin; complete spectrum and zoom from 60 to 0 ppm.

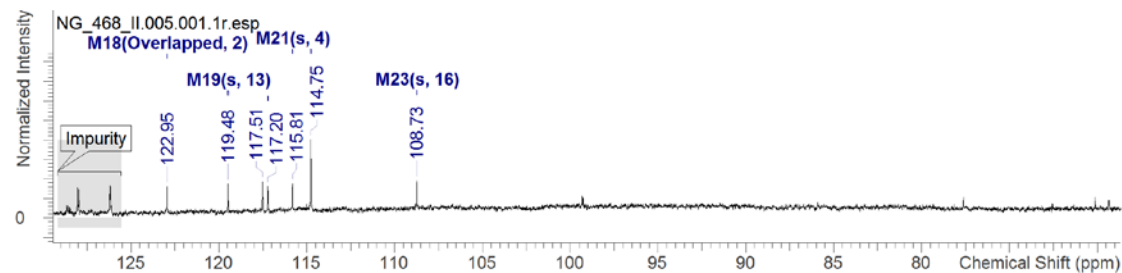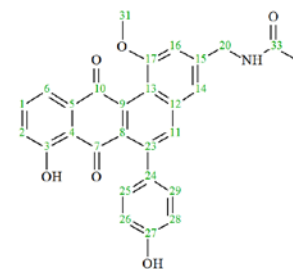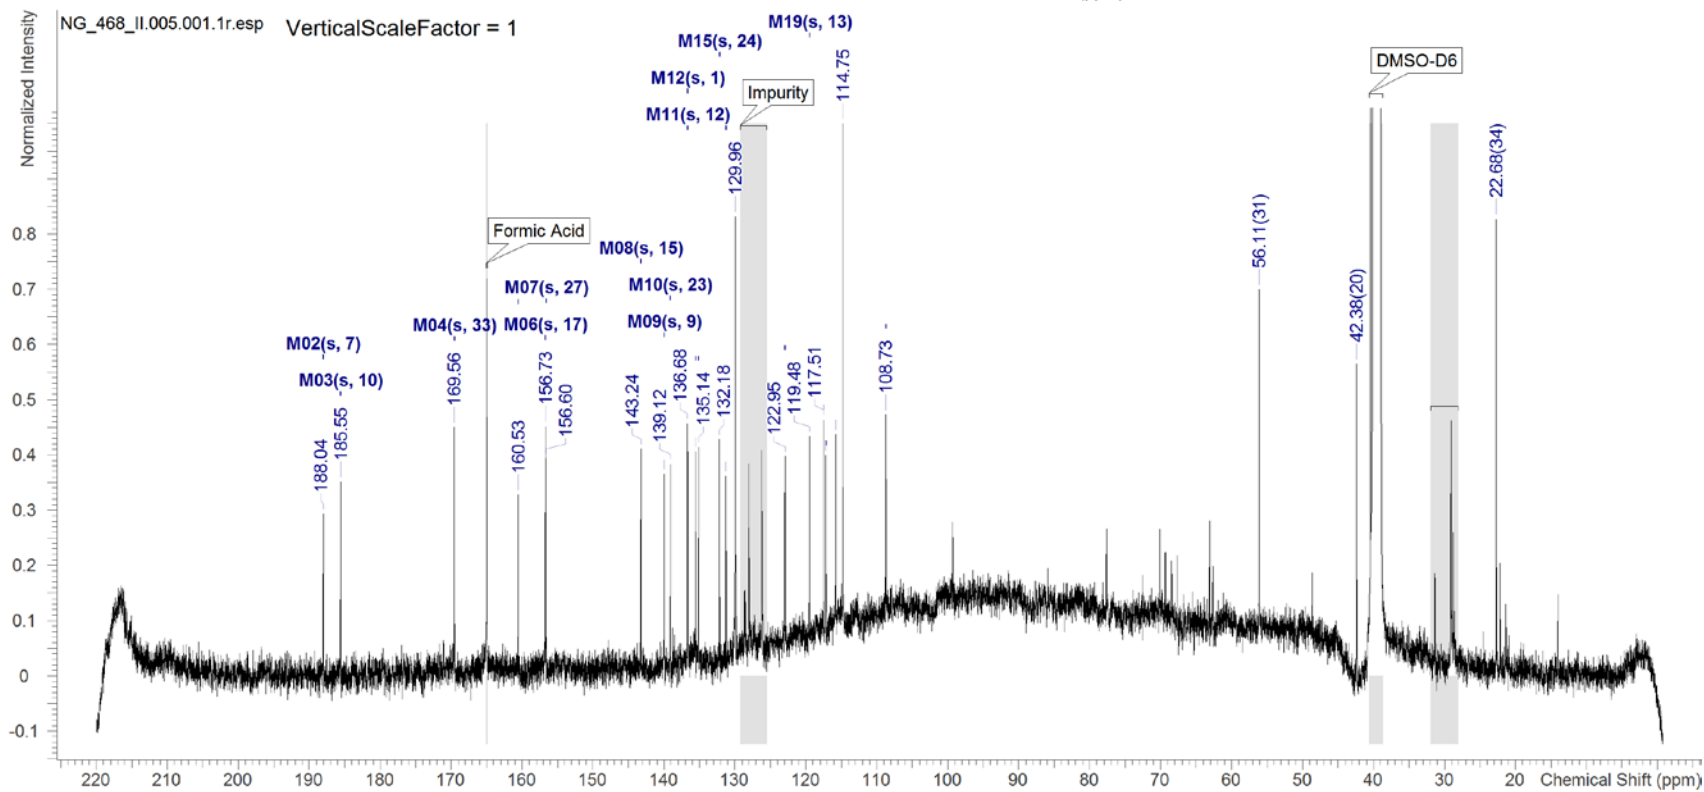

Figure S 14  $^{13}\text{C}$ -NMR (125 MHz,  $\text{DMSO}-d_6$ ) of Pentangumycin; complete spectrum and zoom from 130 to 70 ppm.

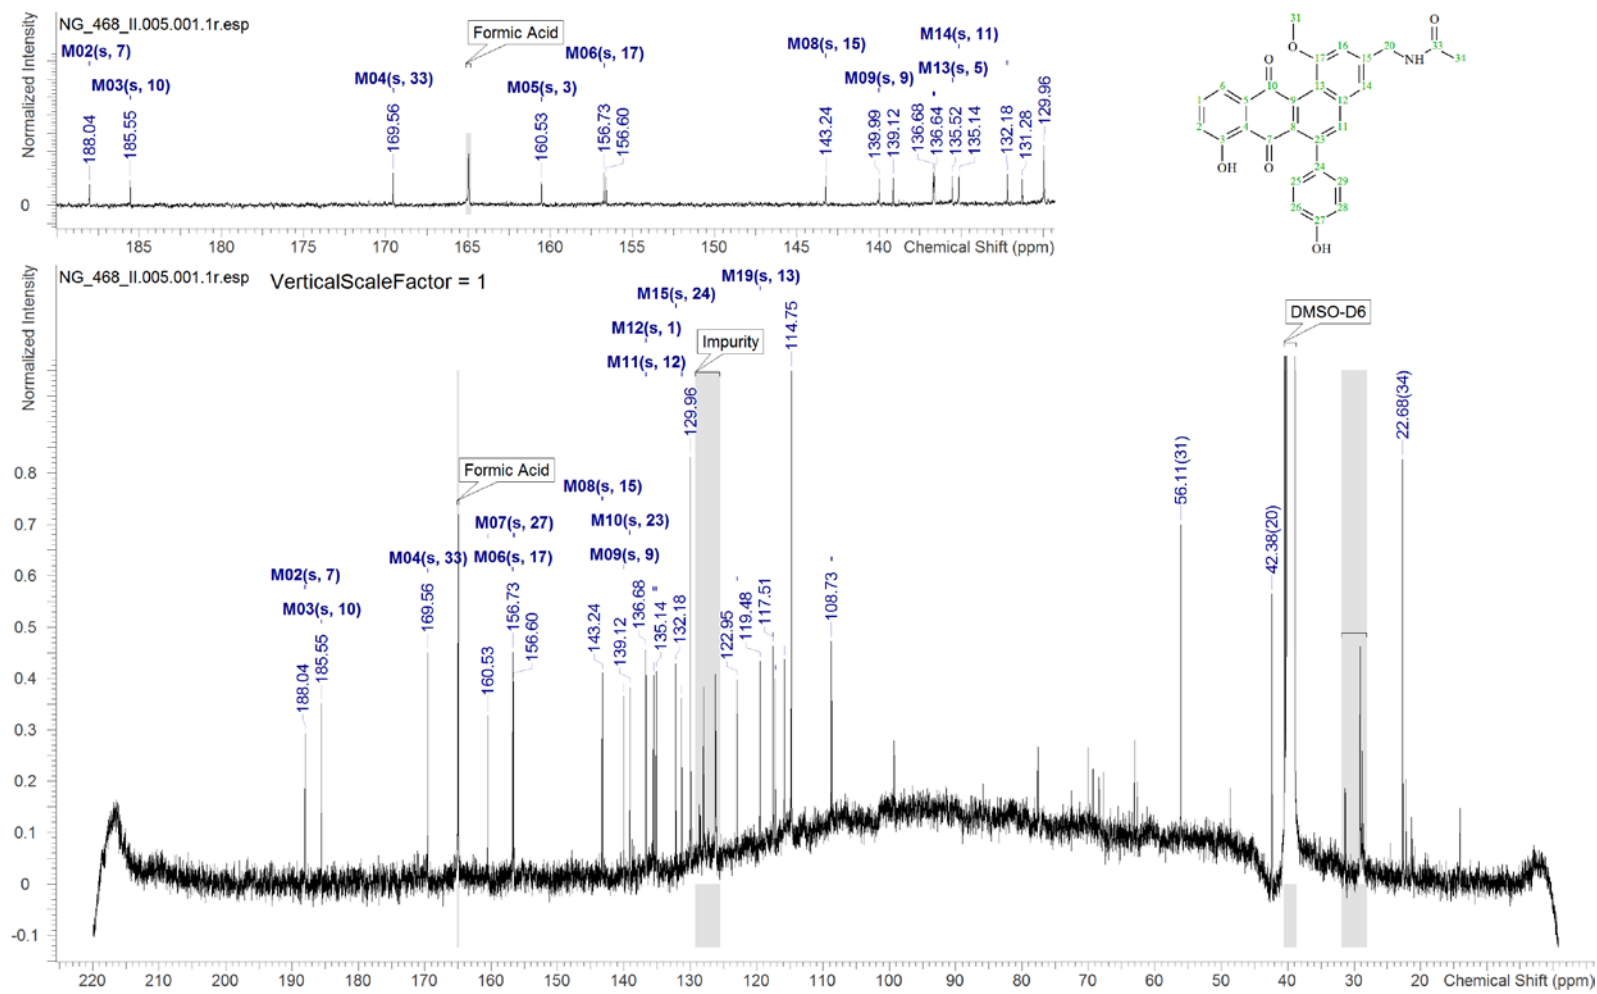

Figure S 15 <sup>13</sup>C-NMR (125 MHz, DMSO- d<sub>6</sub>) of Pentangumycin; complete spectrum and zoom from 190 to 130 ppm.

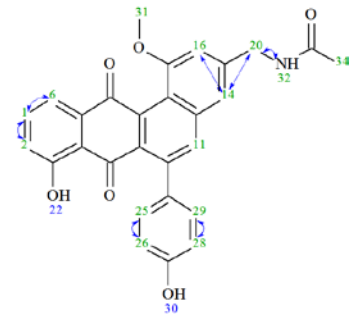

NG\_468\_171128\_neu.002.001.2rr.esp

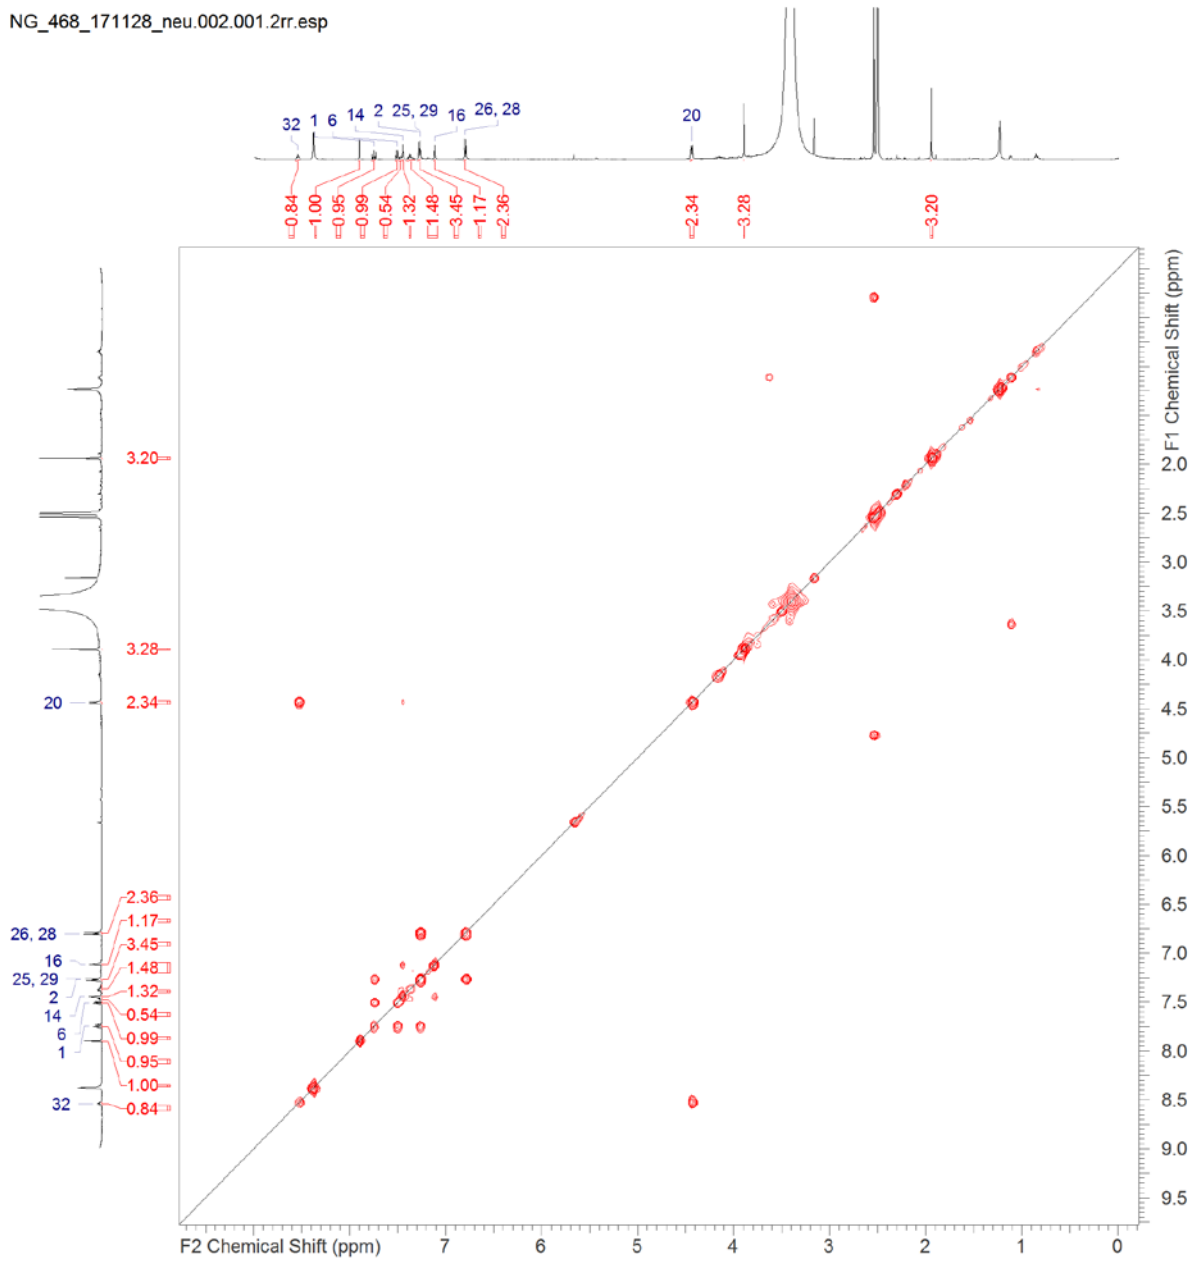

Figure S 16  $^1\text{H}$ - $^1\text{H}$ - COSY spectrum (500 MHz,  $\text{DMSO-d}_6$ ) of Pentangumycin

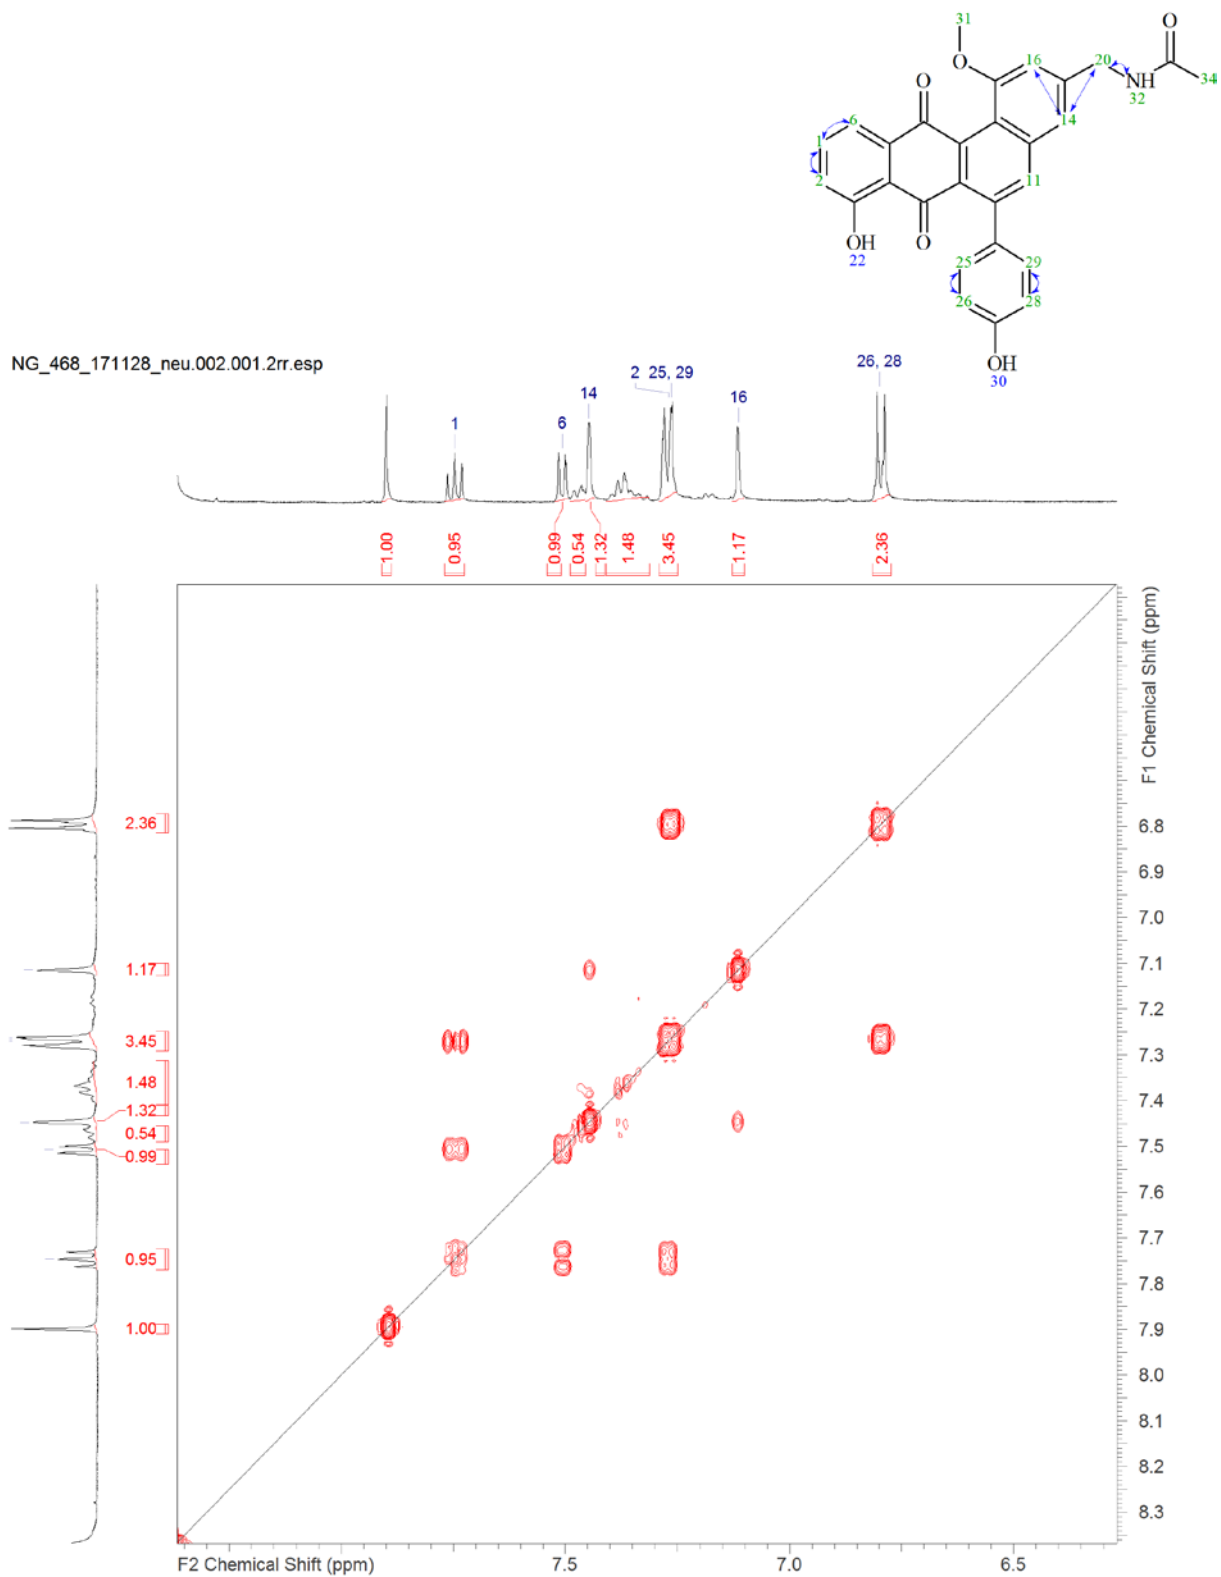

Figure S 17  $^1\text{H}$ - $^1\text{H}$ - COSY spectrum (500 MHz,  $\text{DMSO-d}_6$ ) of Pentangumycin; Zoom to aromatic region

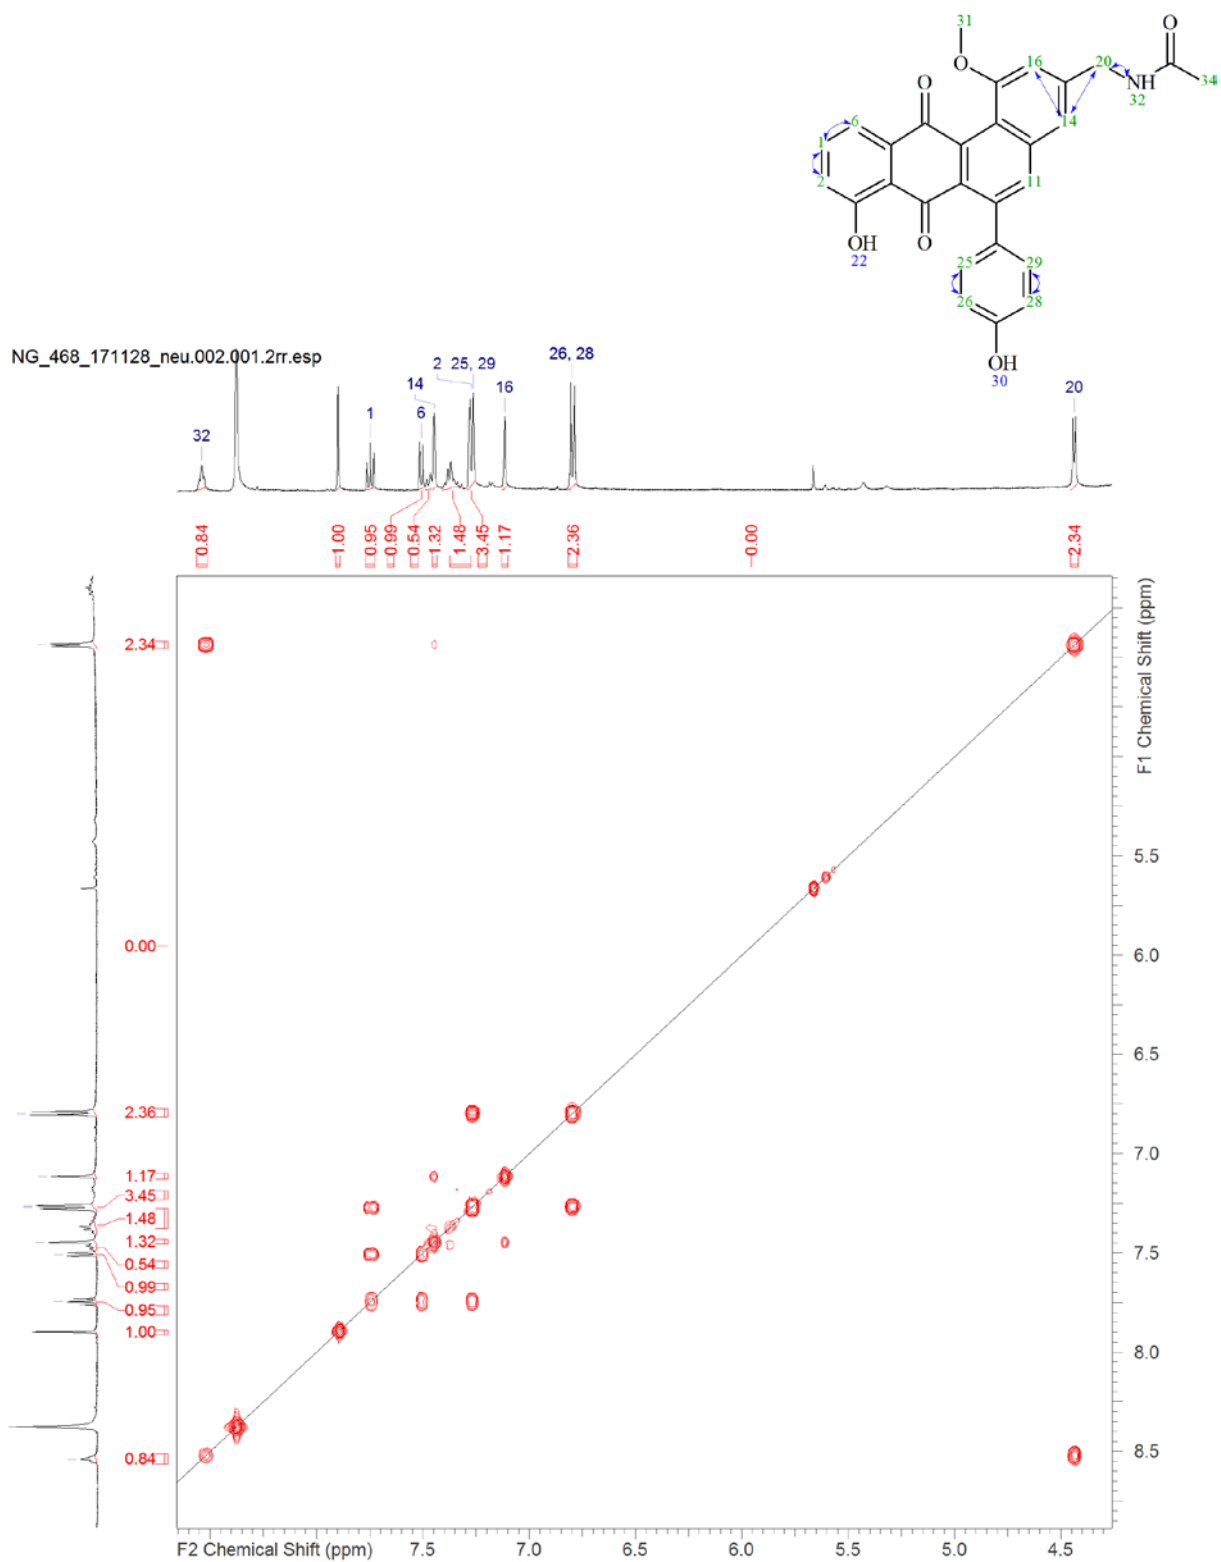

Figure S 18 <sup>1</sup>H-<sup>1</sup>H- COSY spectrum (500 MHz, DMSO-d<sub>6</sub>) of Pentangumycin; Zoom from 8.5 to 4.5 ppm



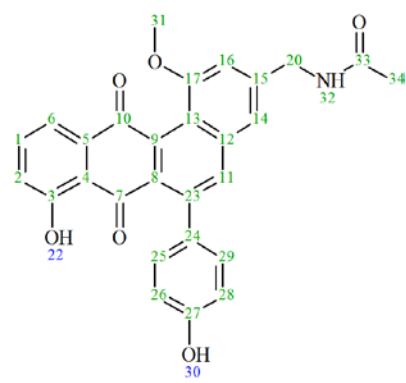

NG\_468\_171128\_neu.003.001.2rr.esp

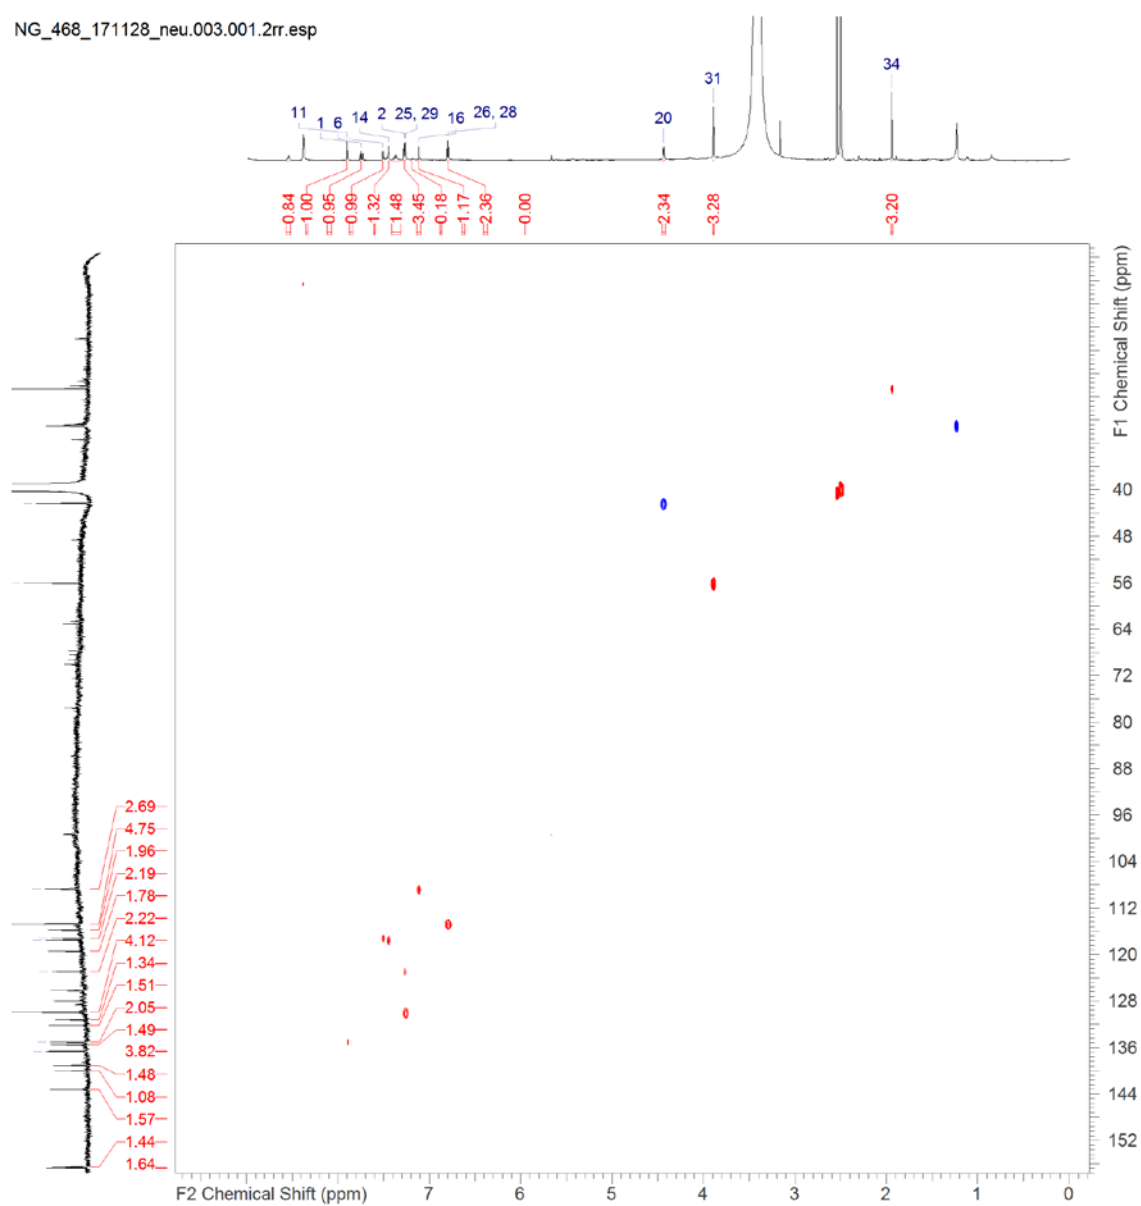

Figure S 19 HSQC-spectrum (500 MHz; 125 MHz, DMSO-d<sub>6</sub>) of Pentangumycin; complete spectrum

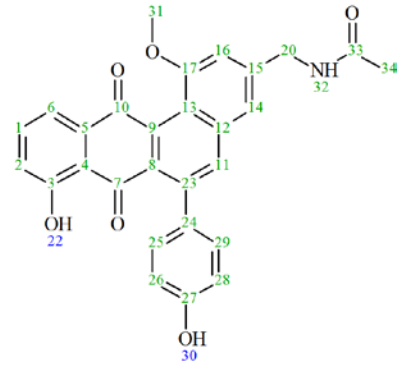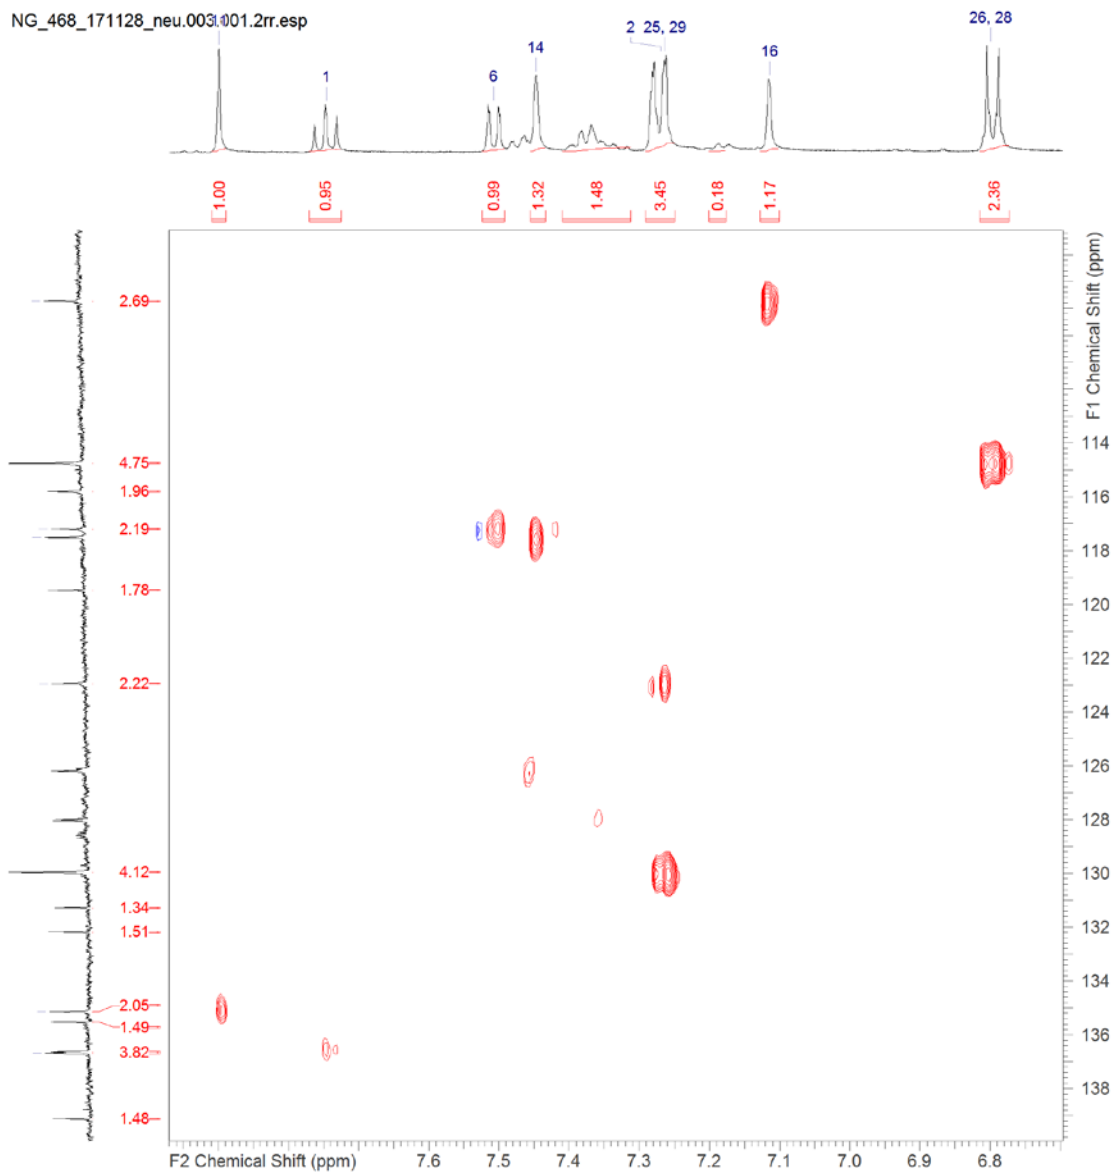

Figure S 20 HSQC-spectrum (500 MHz; 125 MHz, DMSO-d<sub>6</sub>) of Pentangumycin; zoom from 7.9 to 6.8 ppm and 139 to 107 ppm

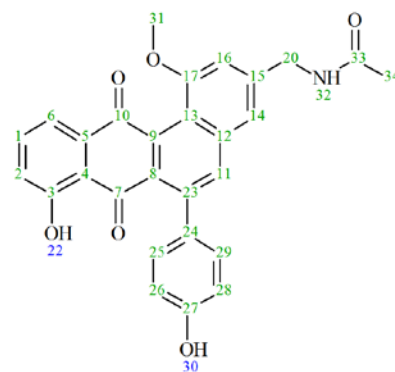

NG\_468\_171128\_neu.003.001.2rr.esp

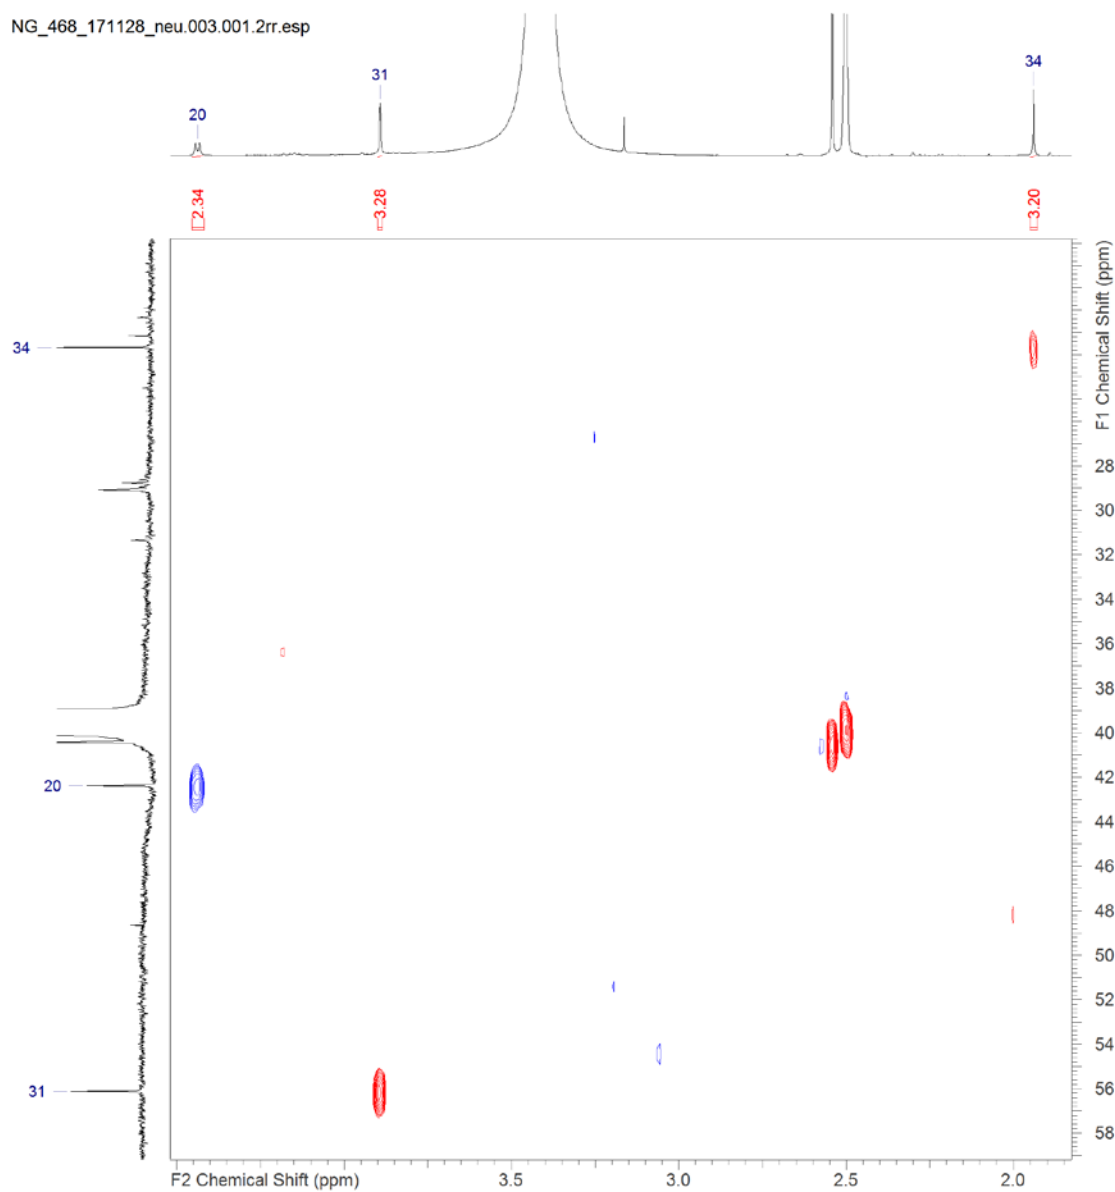

Figure S 21 HSQC-spectrum (500 MHz; 125 MHz, DMSO-d<sub>6</sub>) of Pentangumycin; zoom from 4 to 2 ppm and 59 to 19 ppm

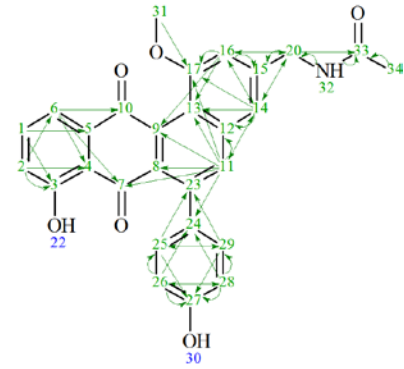

NG\_468\_II.004.001.2rr.esp

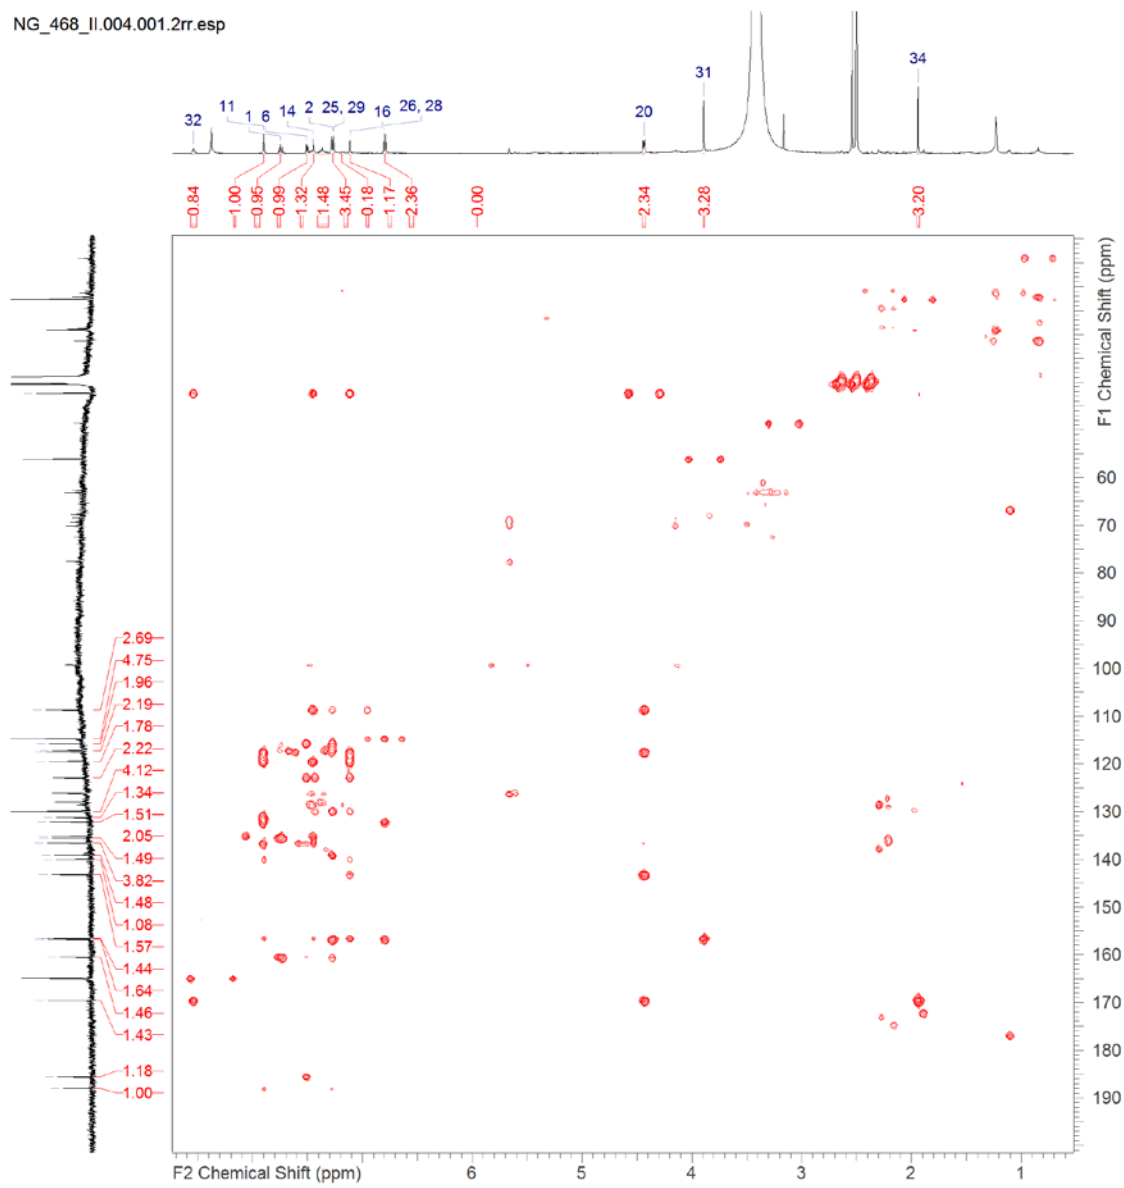

Figure S 22 HMBC-spectrum (500 MHz; 125 MHz, DMSO-d<sub>6</sub>) of Pentangumycin; complete spectrum

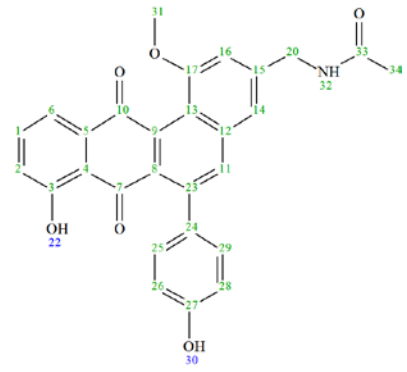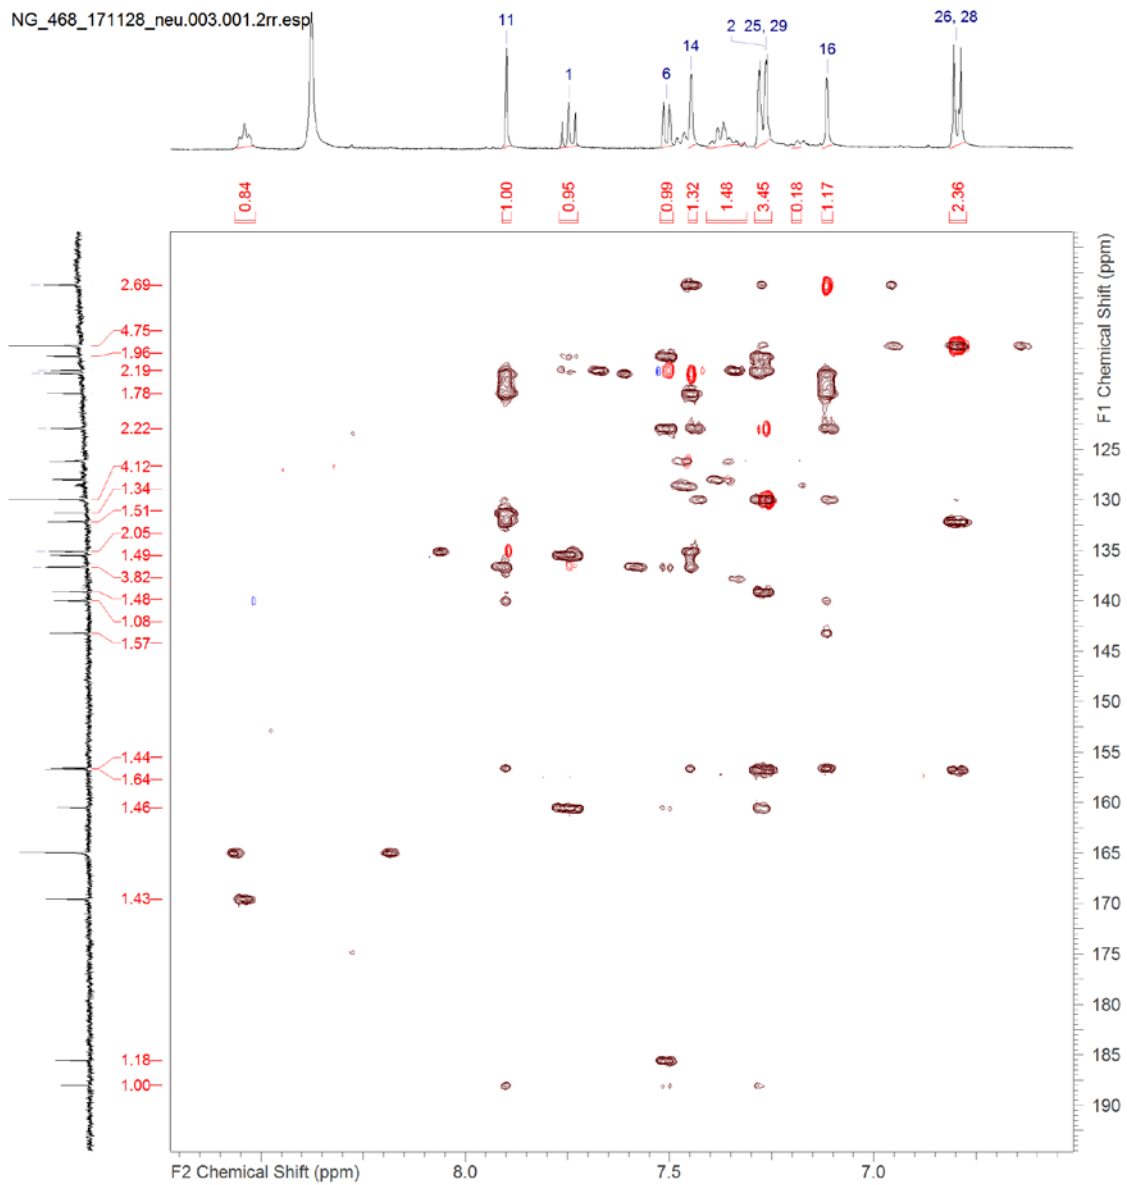

Figure S 23 HMBC - HSQC-Overlay spectrum (500 MHz; 125 MHz, DMSO-d<sub>6</sub>) of Pentangumycin (black: HMBC; red/blue: HSQC); zoom from 9.2 to 6.5 ppm and 195 to 110 ppm

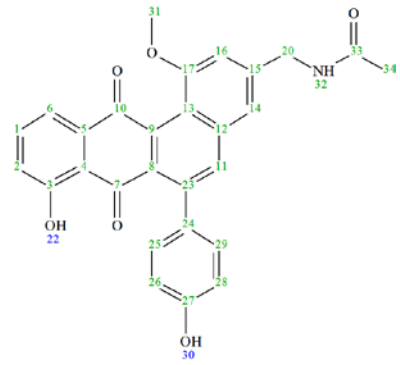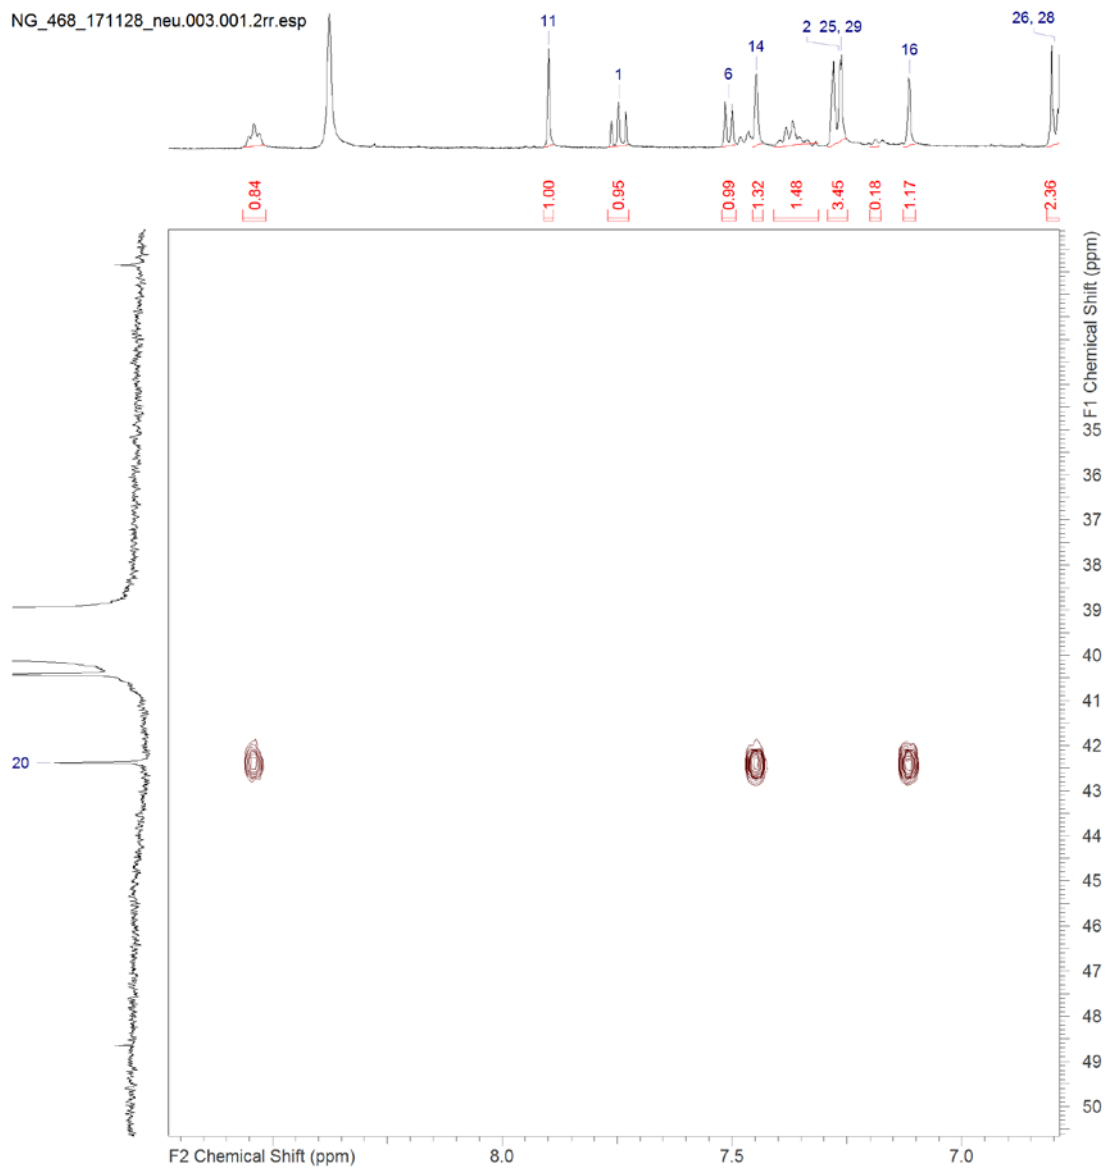

Figure S 24 HMBC - HSQC-Overlay spectrum (500 MHz; 125 MHz, DMSO- $d_6$ ) of Pentangumycin (black: HMBC; red/blue: HSQC); zoom from 9.2 to 6.5 ppm and 50 to 31 ppm

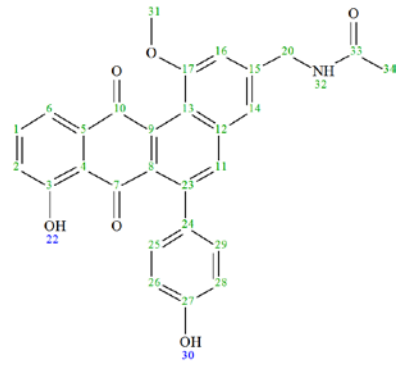

NG\_468\_171128\_neu.003.001.2rr.esp

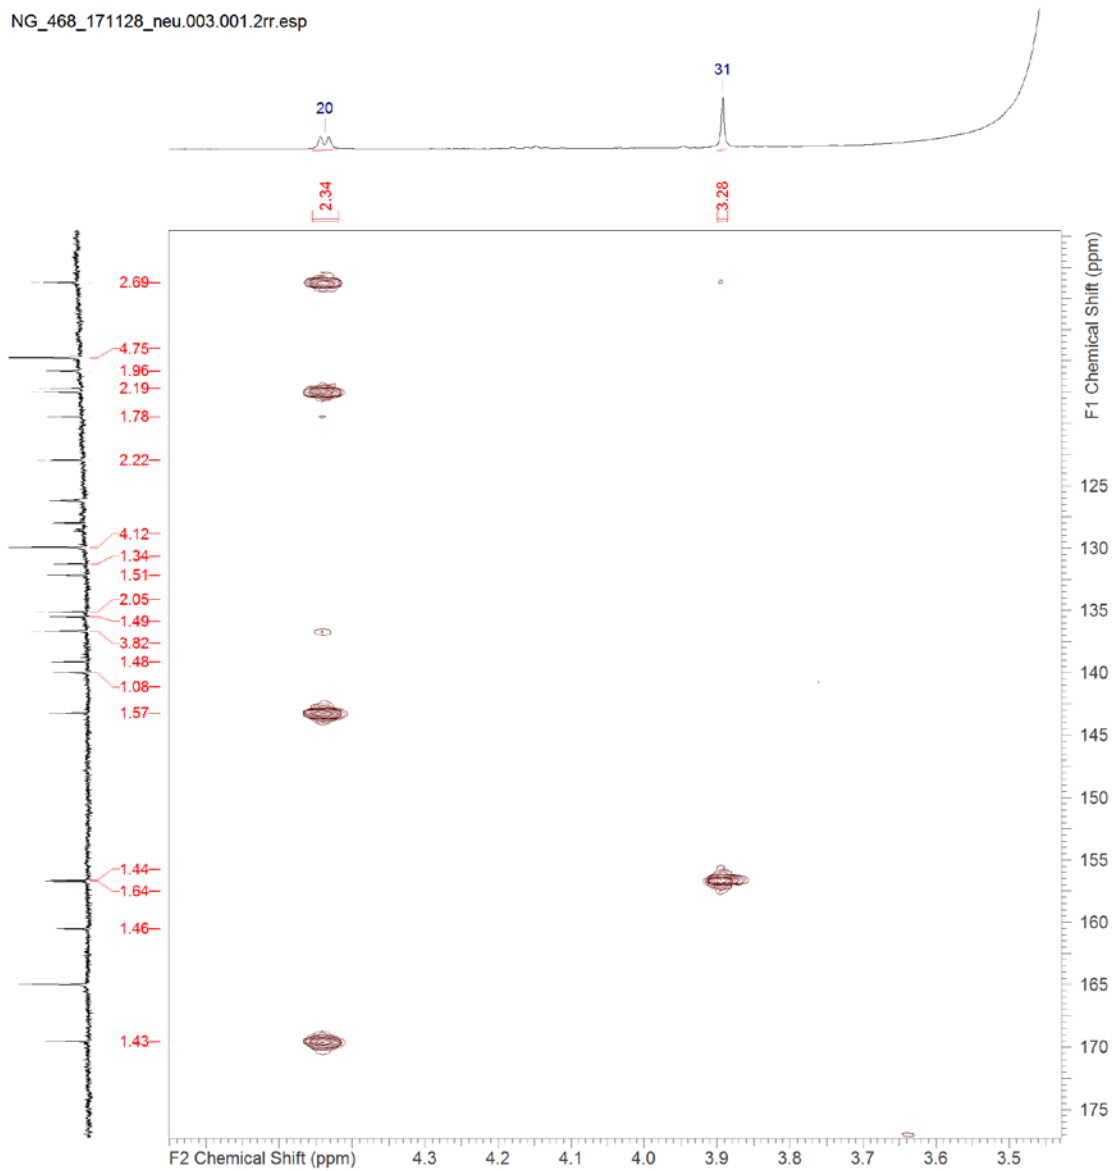

Figure S 25 HMBC - HSQC-Overlay spectrum (500 MHz; 125 MHz, DMSO-d<sub>6</sub>) of Pentangumycin (black: HSQC; red/blue: HMBC); zoom from 4.6 to 3.5 ppm and 110 to 175 ppm

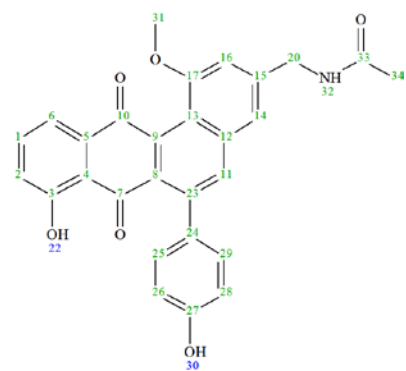

NG\_468\_171128\_neu.003.001.2rr.esp

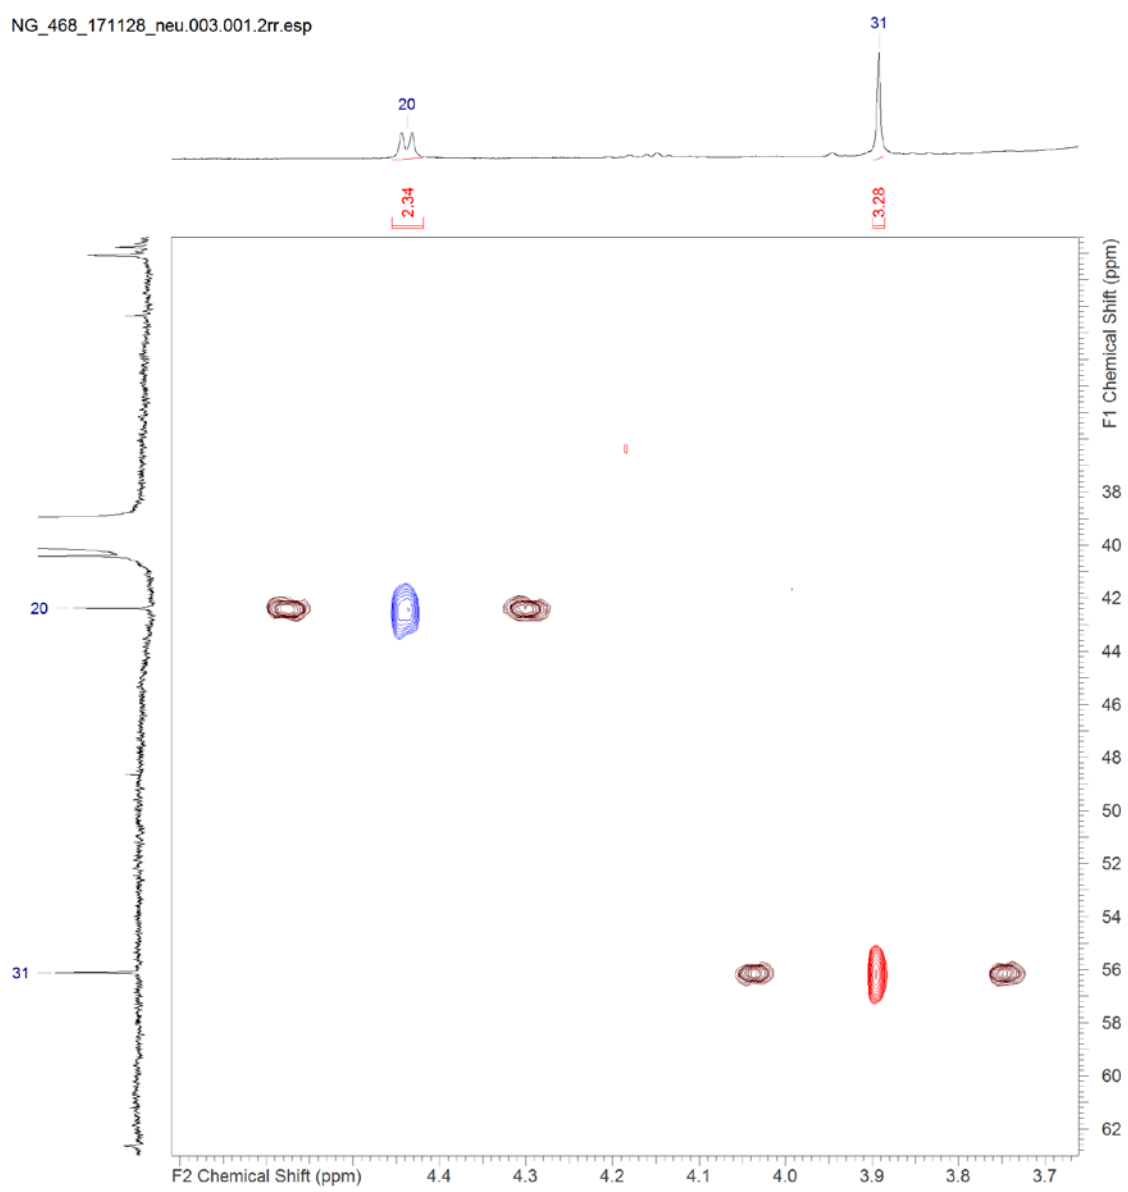

Figure S 26 HMBC - HSQC-Overlay spectrum (500 MHz; 125 MHz, DMSO-d<sub>6</sub>) of Pentangumycin (black: HMBC; red/blue: HSQC); zoom from 4.6 to 3.7 ppm and 62 to 34 ppm



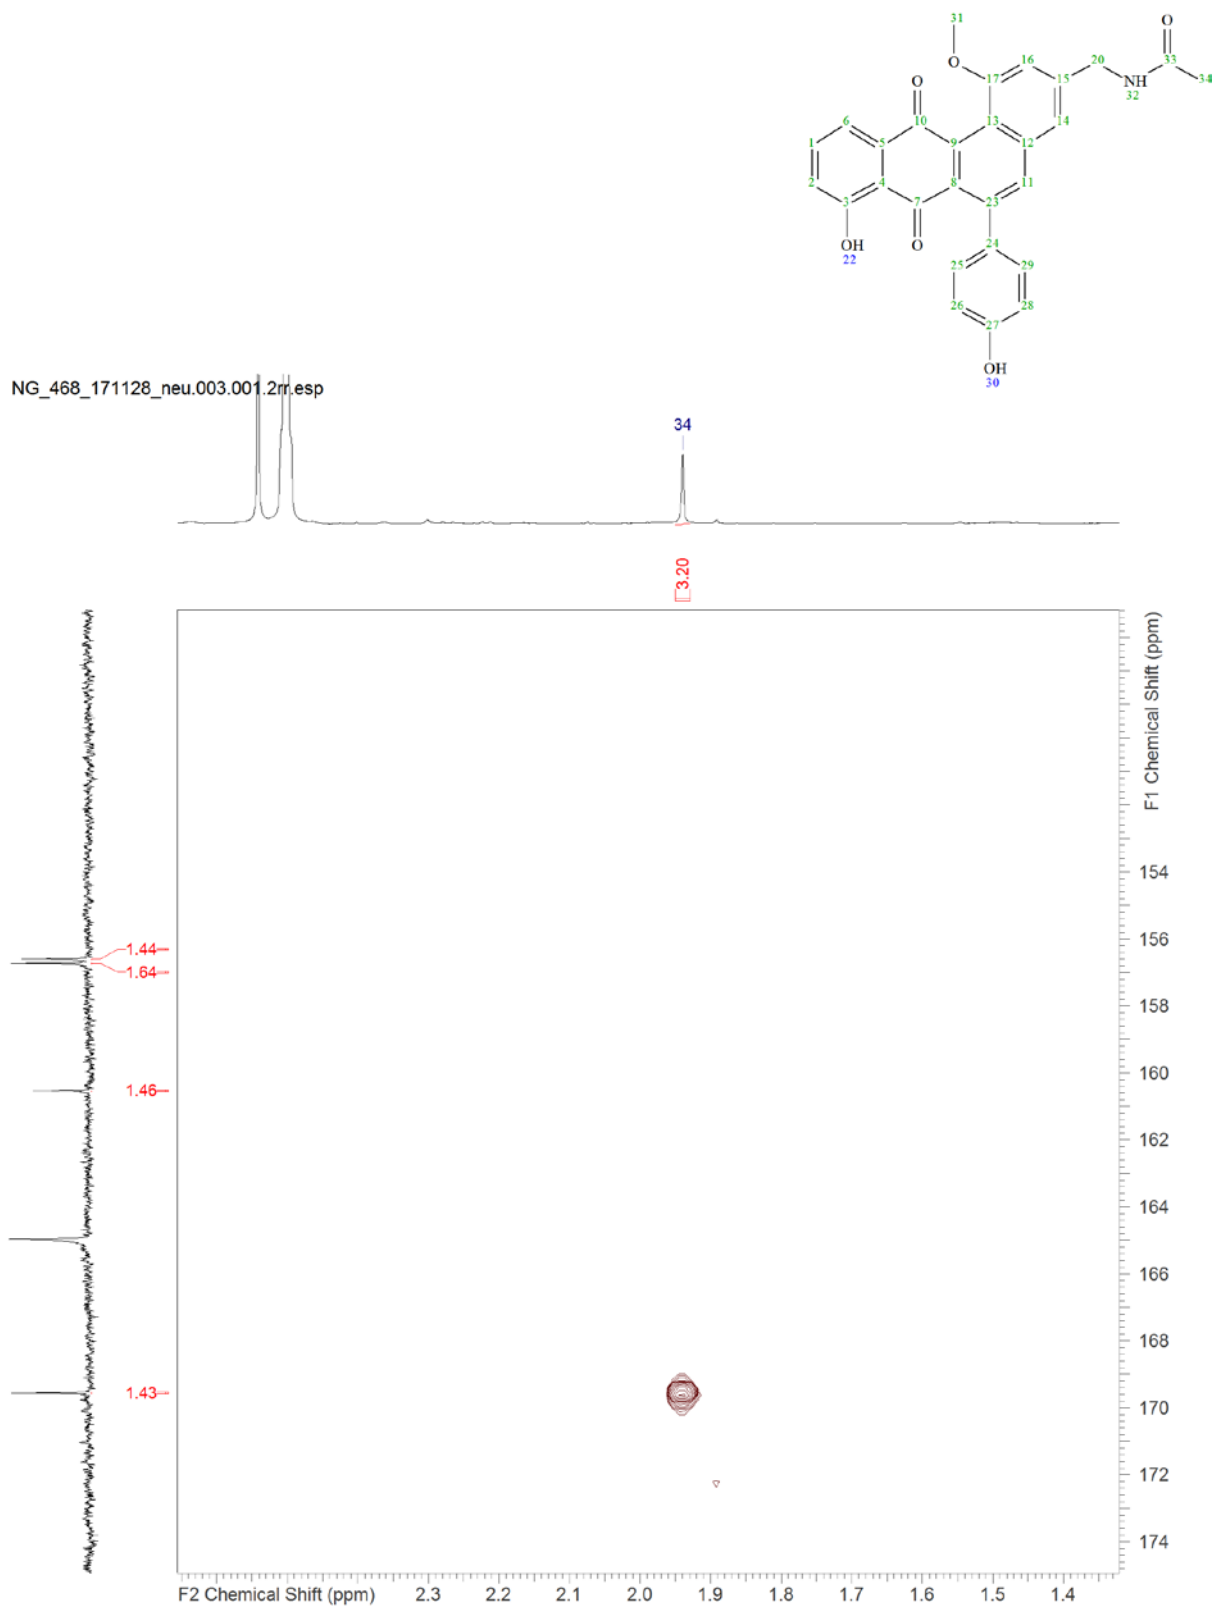

Figure S 27 HMBC - HSQC-Overlay spectrum (500 MHz; 125 MHz, DMSO-d<sub>6</sub>) of Pentangumycin (black: HMBC; red/blue: HSQC); zoom from 2.6 to 1.4 ppm and 174 to 151 ppm

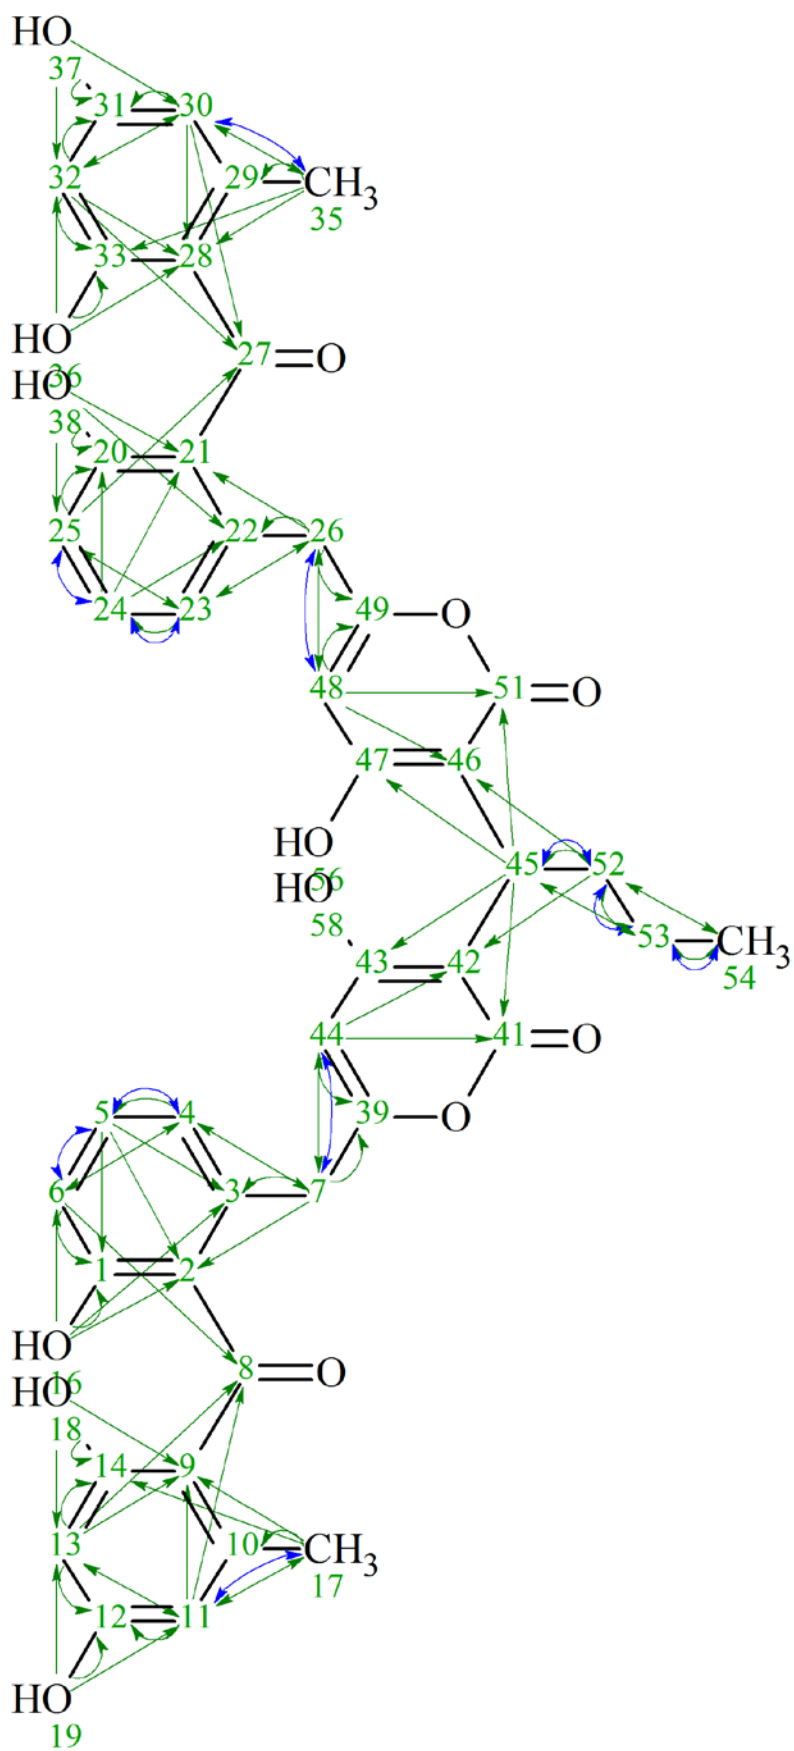

Figure S 28 Structure of SEK90 with all correlations (green: HMBC correlations H → C; blue: <sup>1</sup>H-<sup>1</sup>H-Cosy correlation)

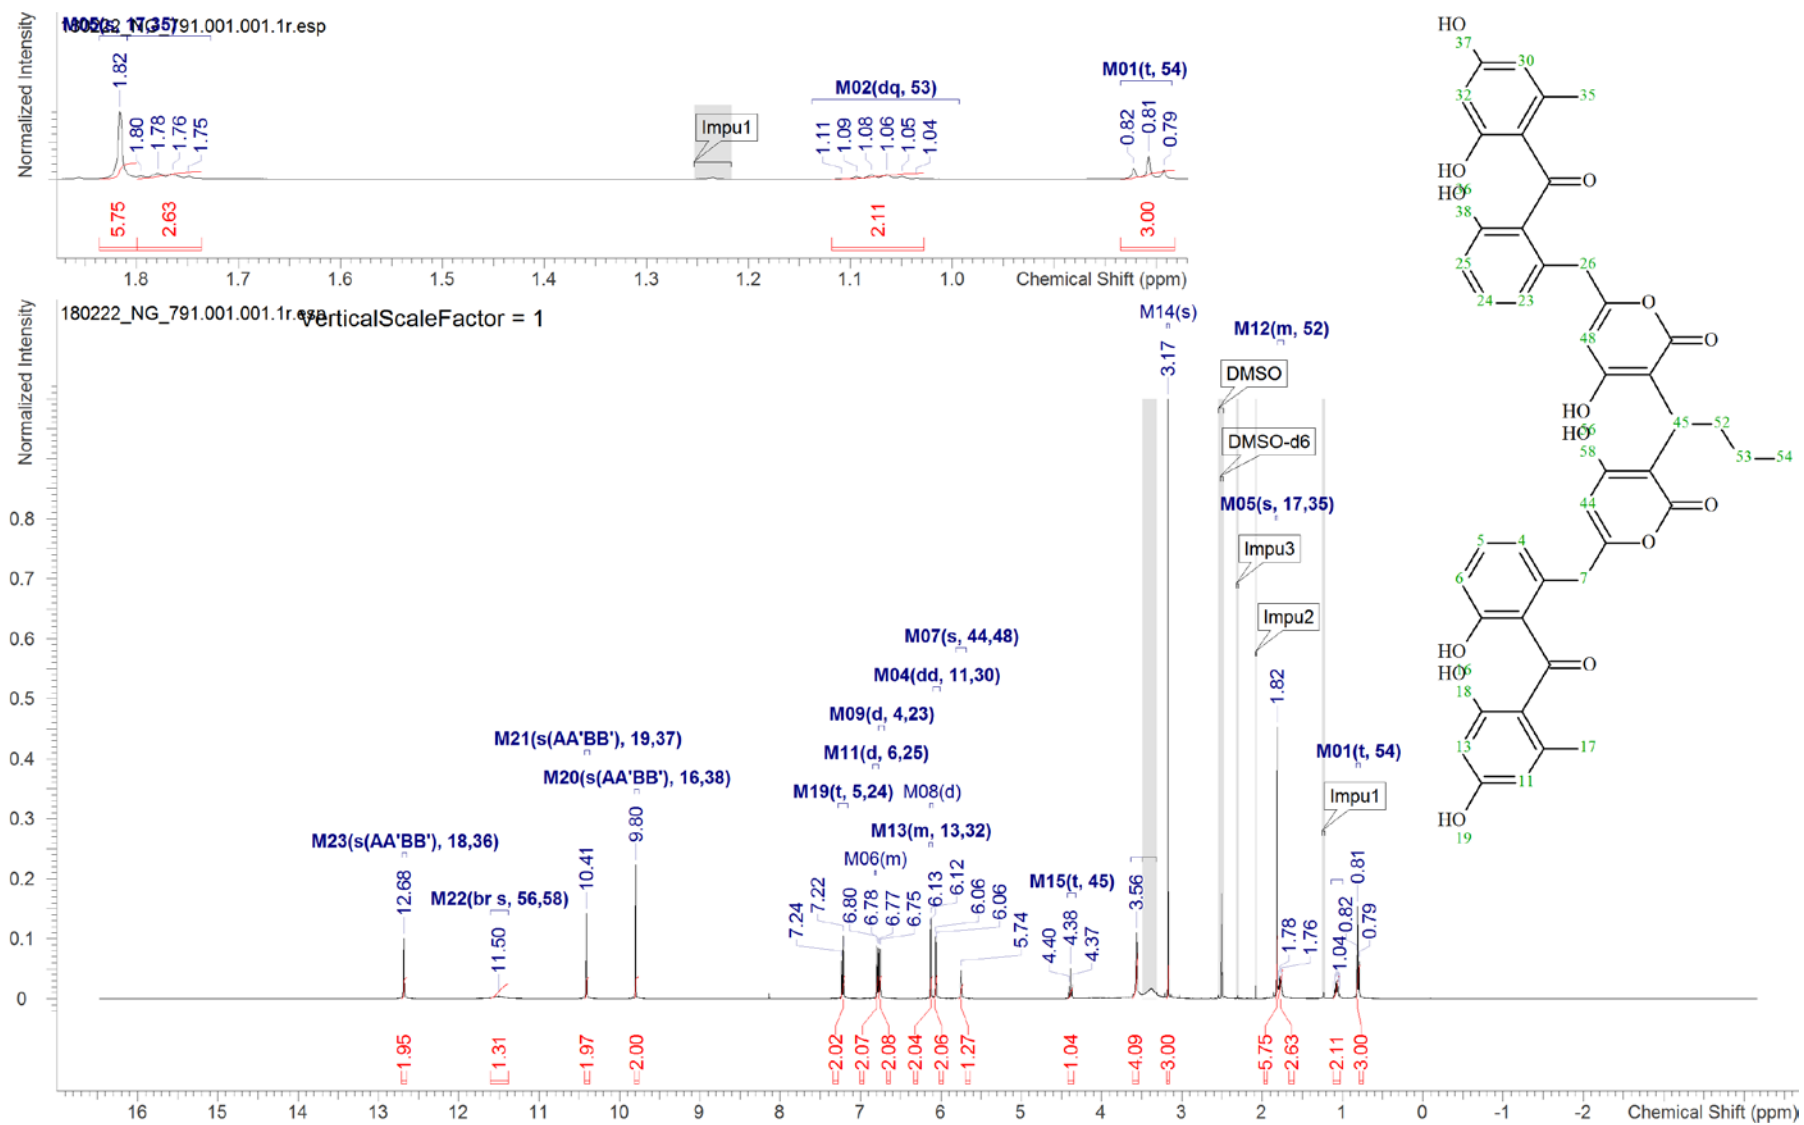

Figure S 29  $^1\text{H-NMR}$  spectrum (500 MHz,  $\text{DMSO-d}_6$ ) of SEK90; complete Spectrum and zoom from 1.8 to 0.7 ppm

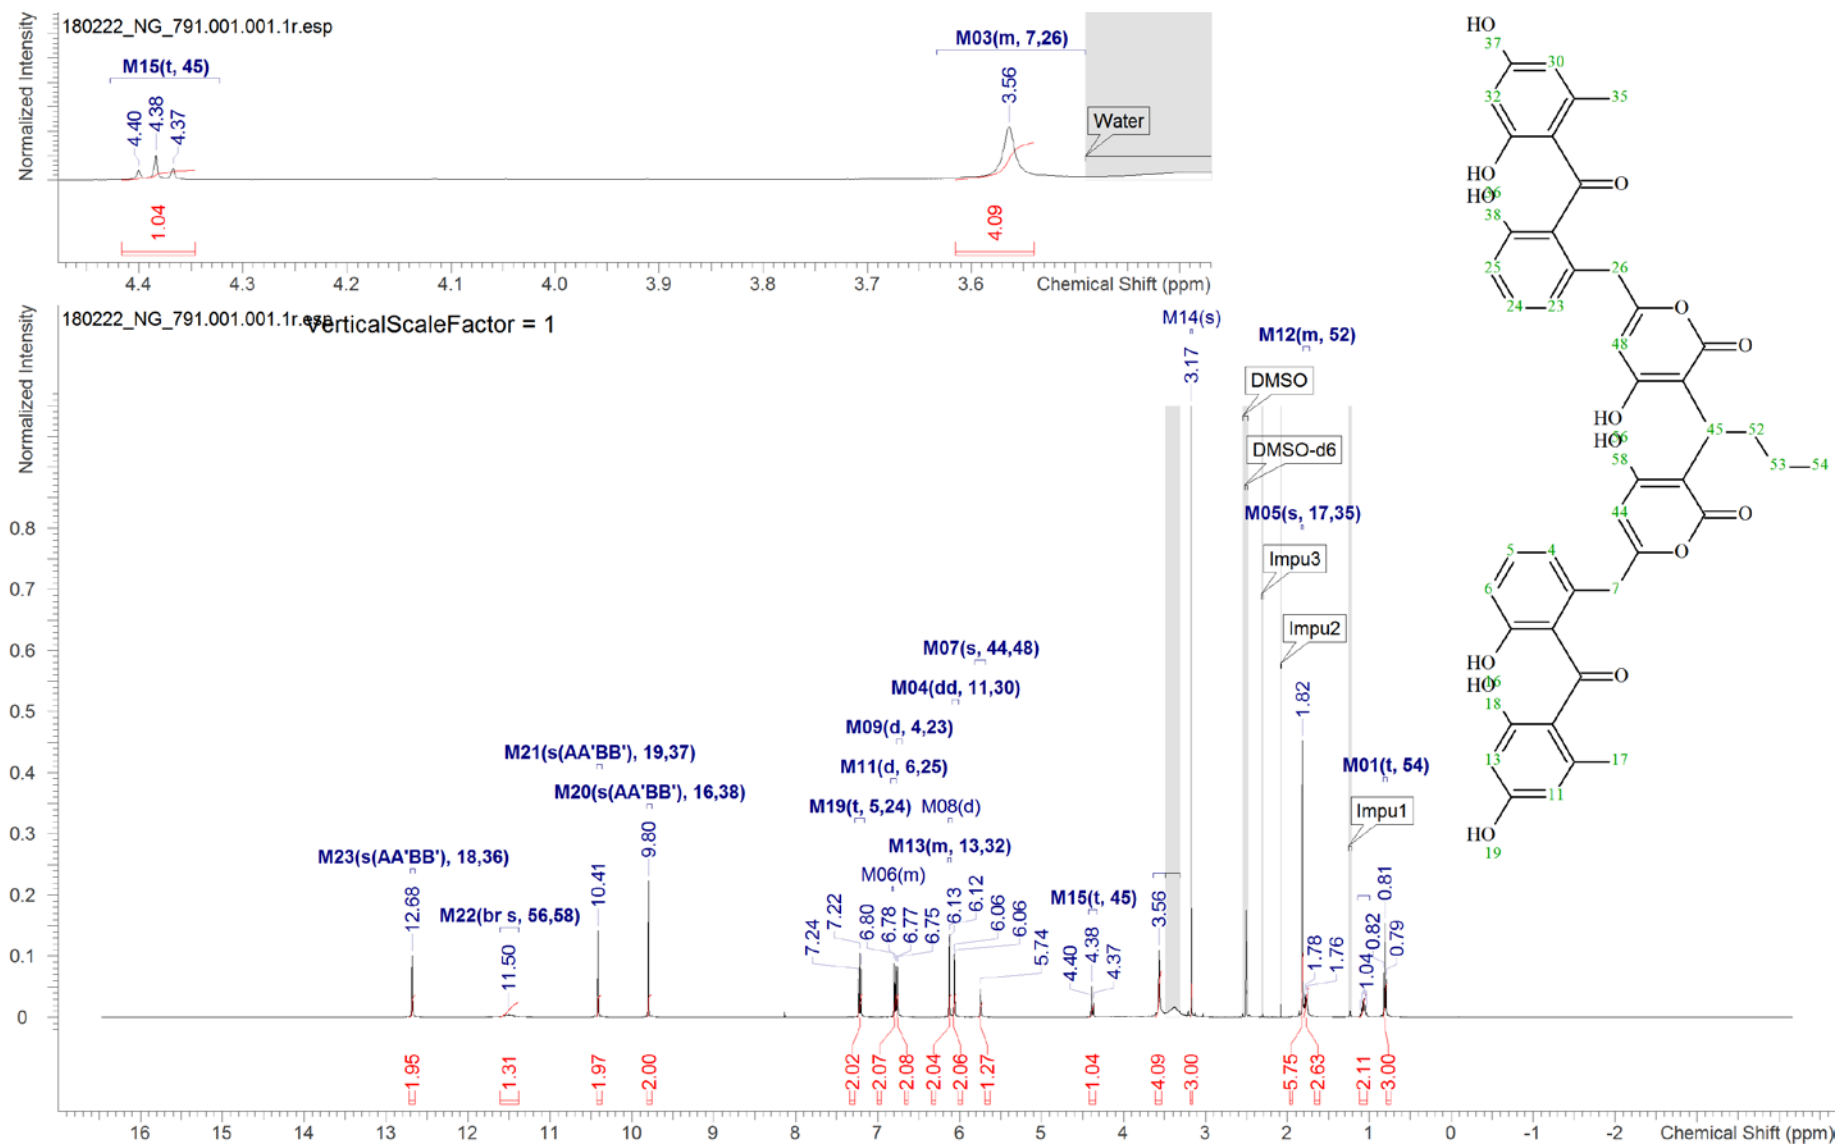

Figure S 30  $^1\text{H-NMR}$  spectrum (500 MHz,  $\text{DMSO-d}_6$ ) of SEK90; complete Spectrum and zoom from 4.4 to 3.4 ppm

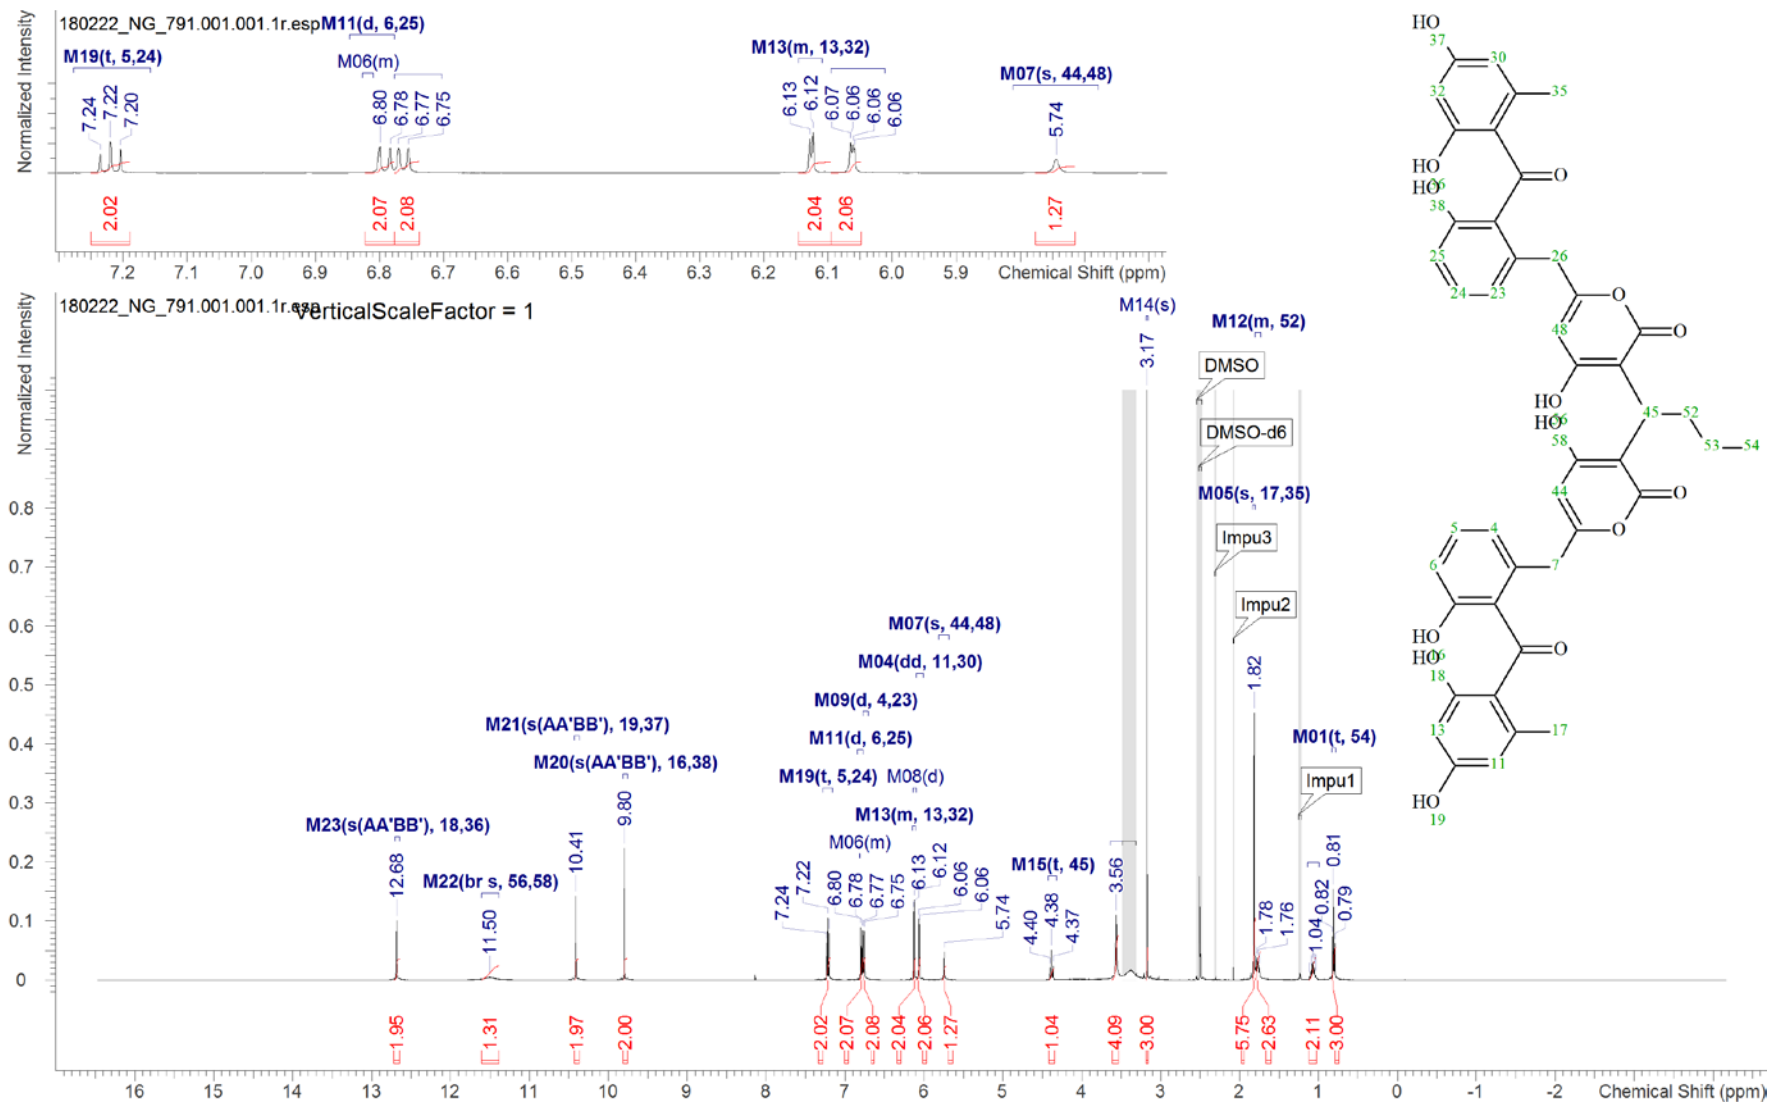

Figure S 31  $^1\text{H-NMR}$  spectrum (500 MHz,  $\text{DMSO-d}_6$ ) of SEK90; complete Spectrum and zoom from 7.2 to 5.7 ppm

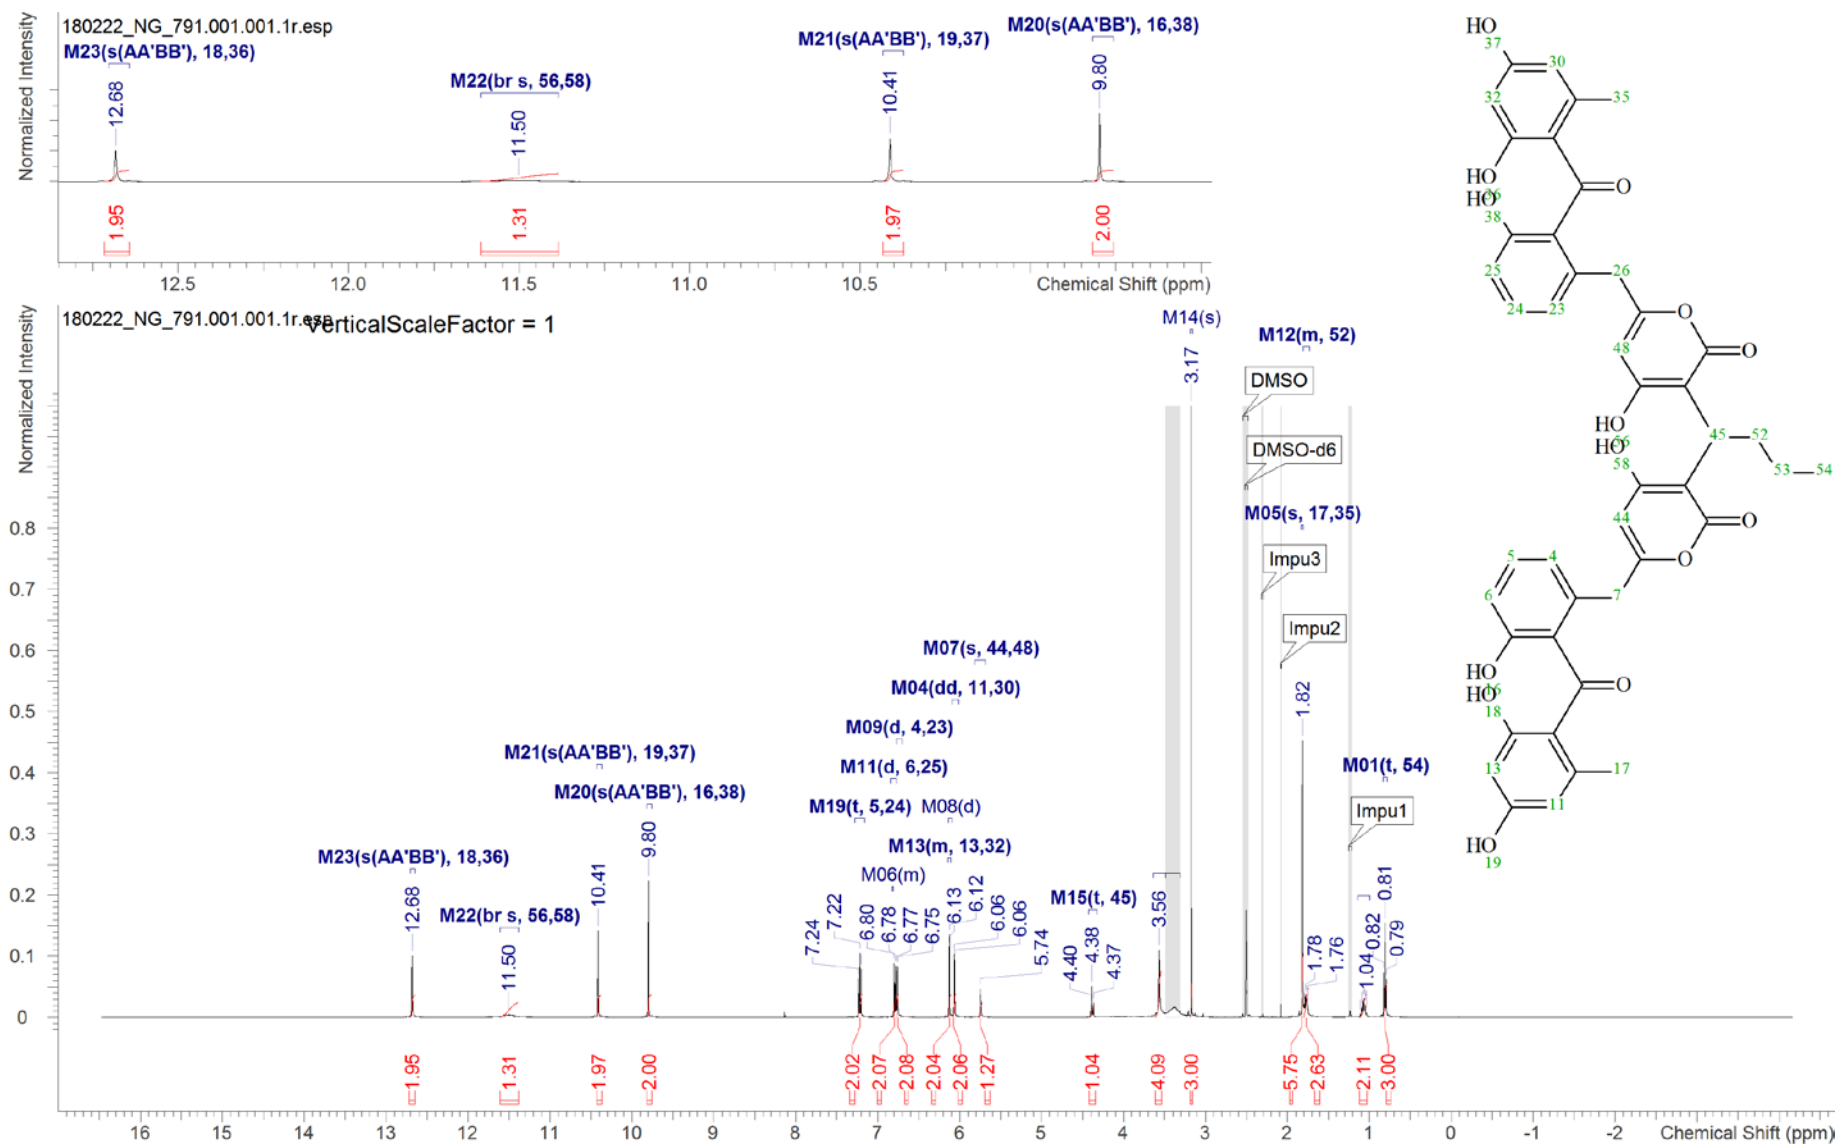

Figure S 32  $^1\text{H-NMR}$  spectrum (500 MHz,  $\text{DMSO-d}_6$ ) of SEK90; complete Spectrum and zoom from 13 to 9.5 ppm

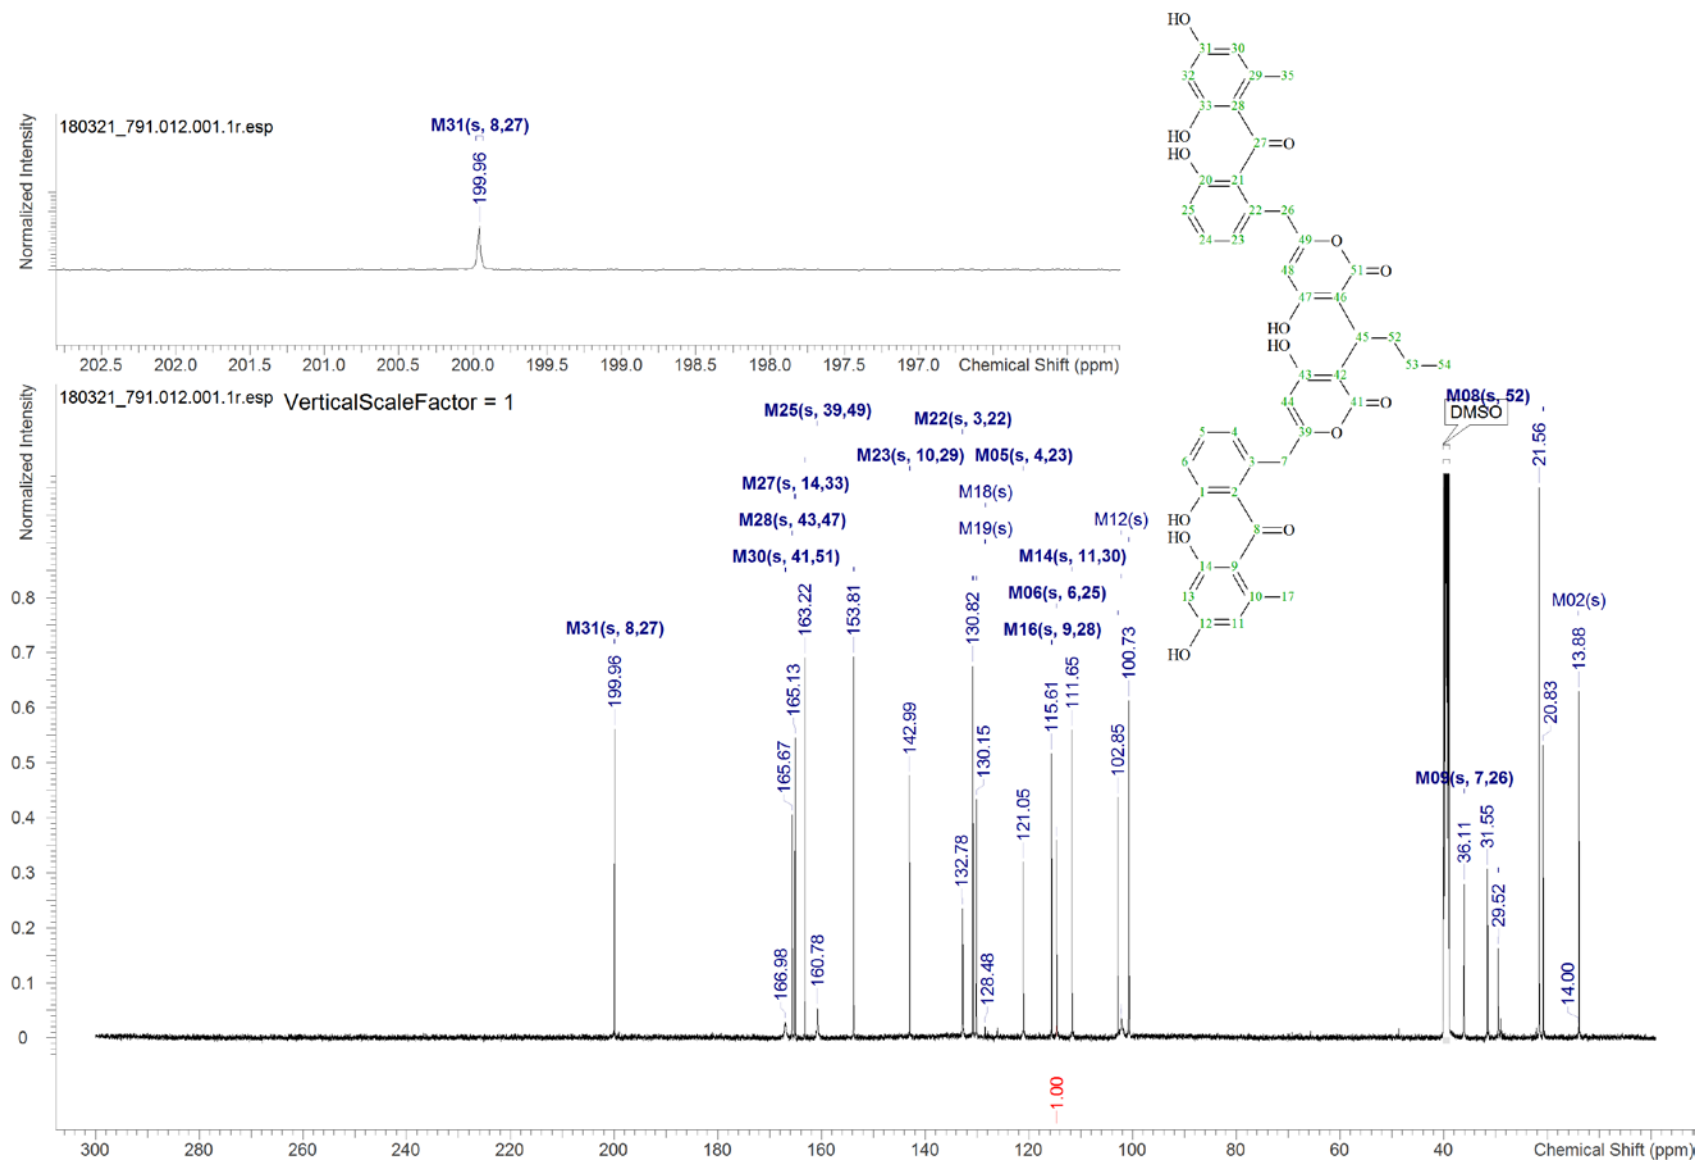

Figure S 33 <sup>13</sup>C-NMR spectrum (125 MHz, DMSO-d<sub>6</sub>) of SEK90; complete Spectrum and zoom from 202 to 196 ppm

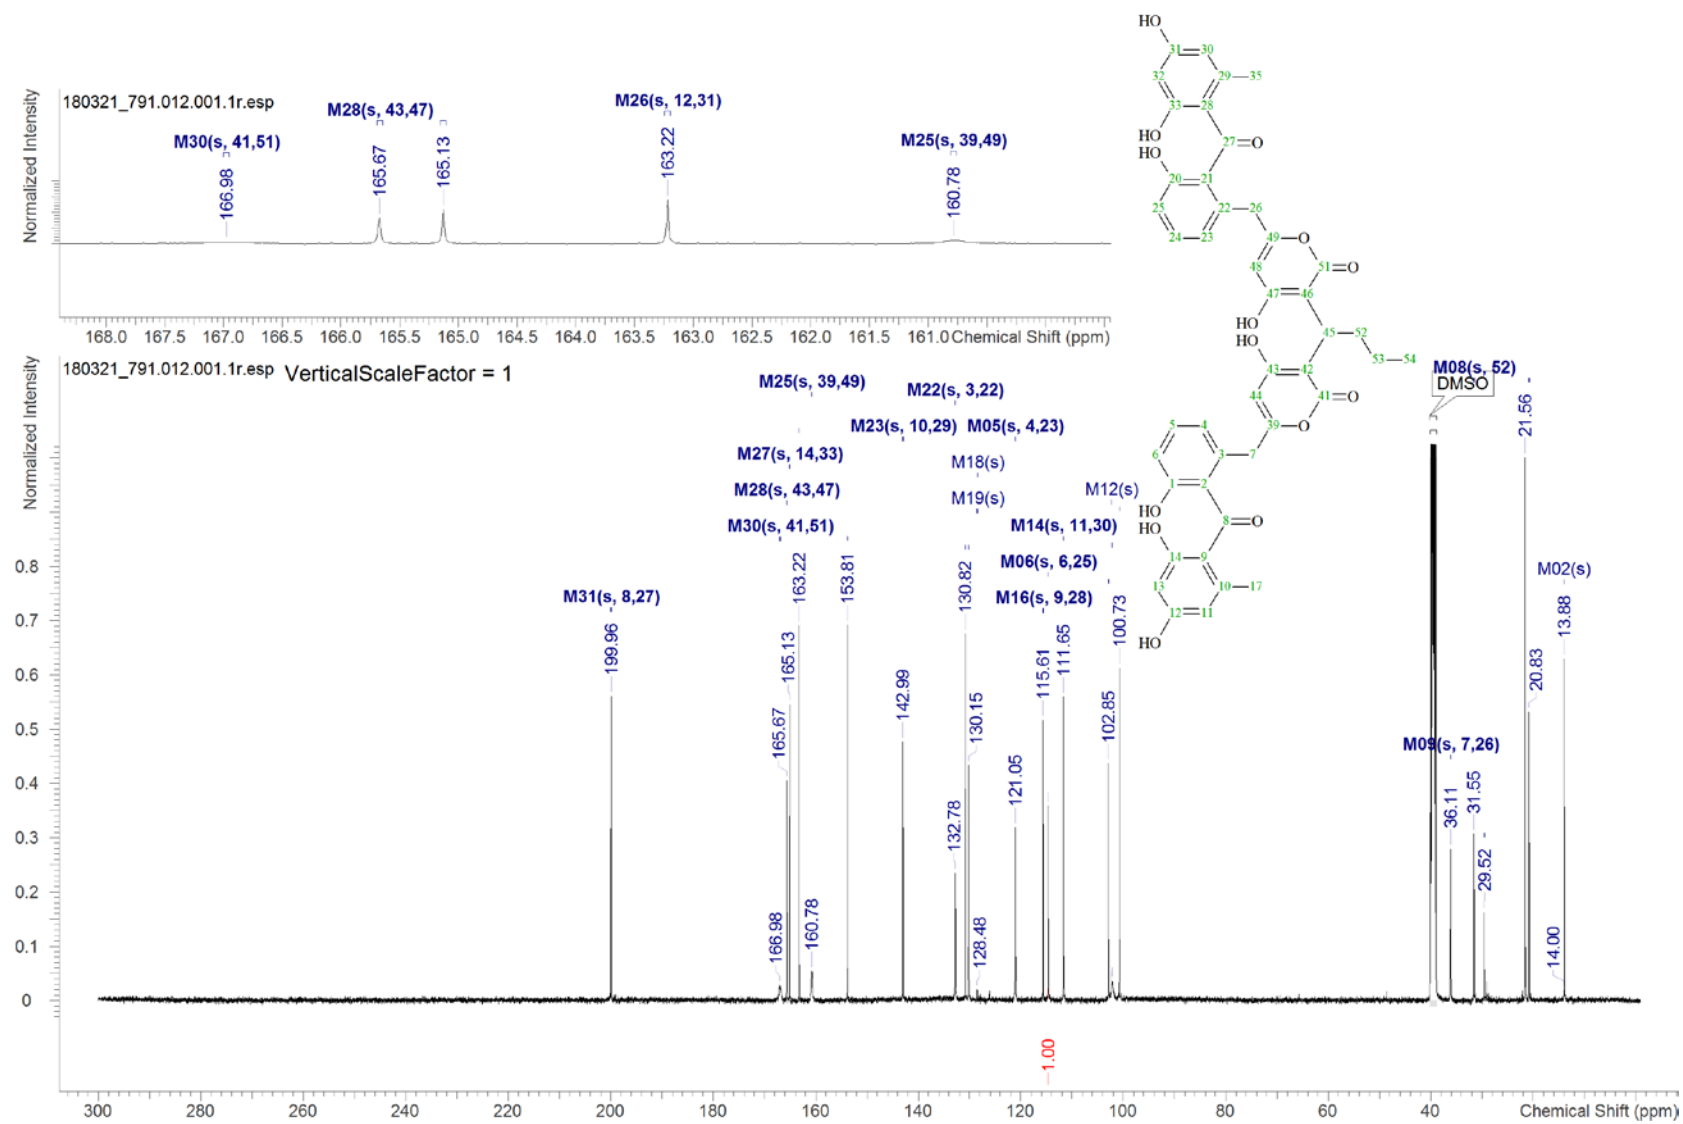

Figure S 34  $^{13}\text{C}$ -NMR spectrum (125 MHz,  $\text{DMSO-d}_6$ ) of SEK90; complete Spectrum and zoom from 168 to 60 ppm



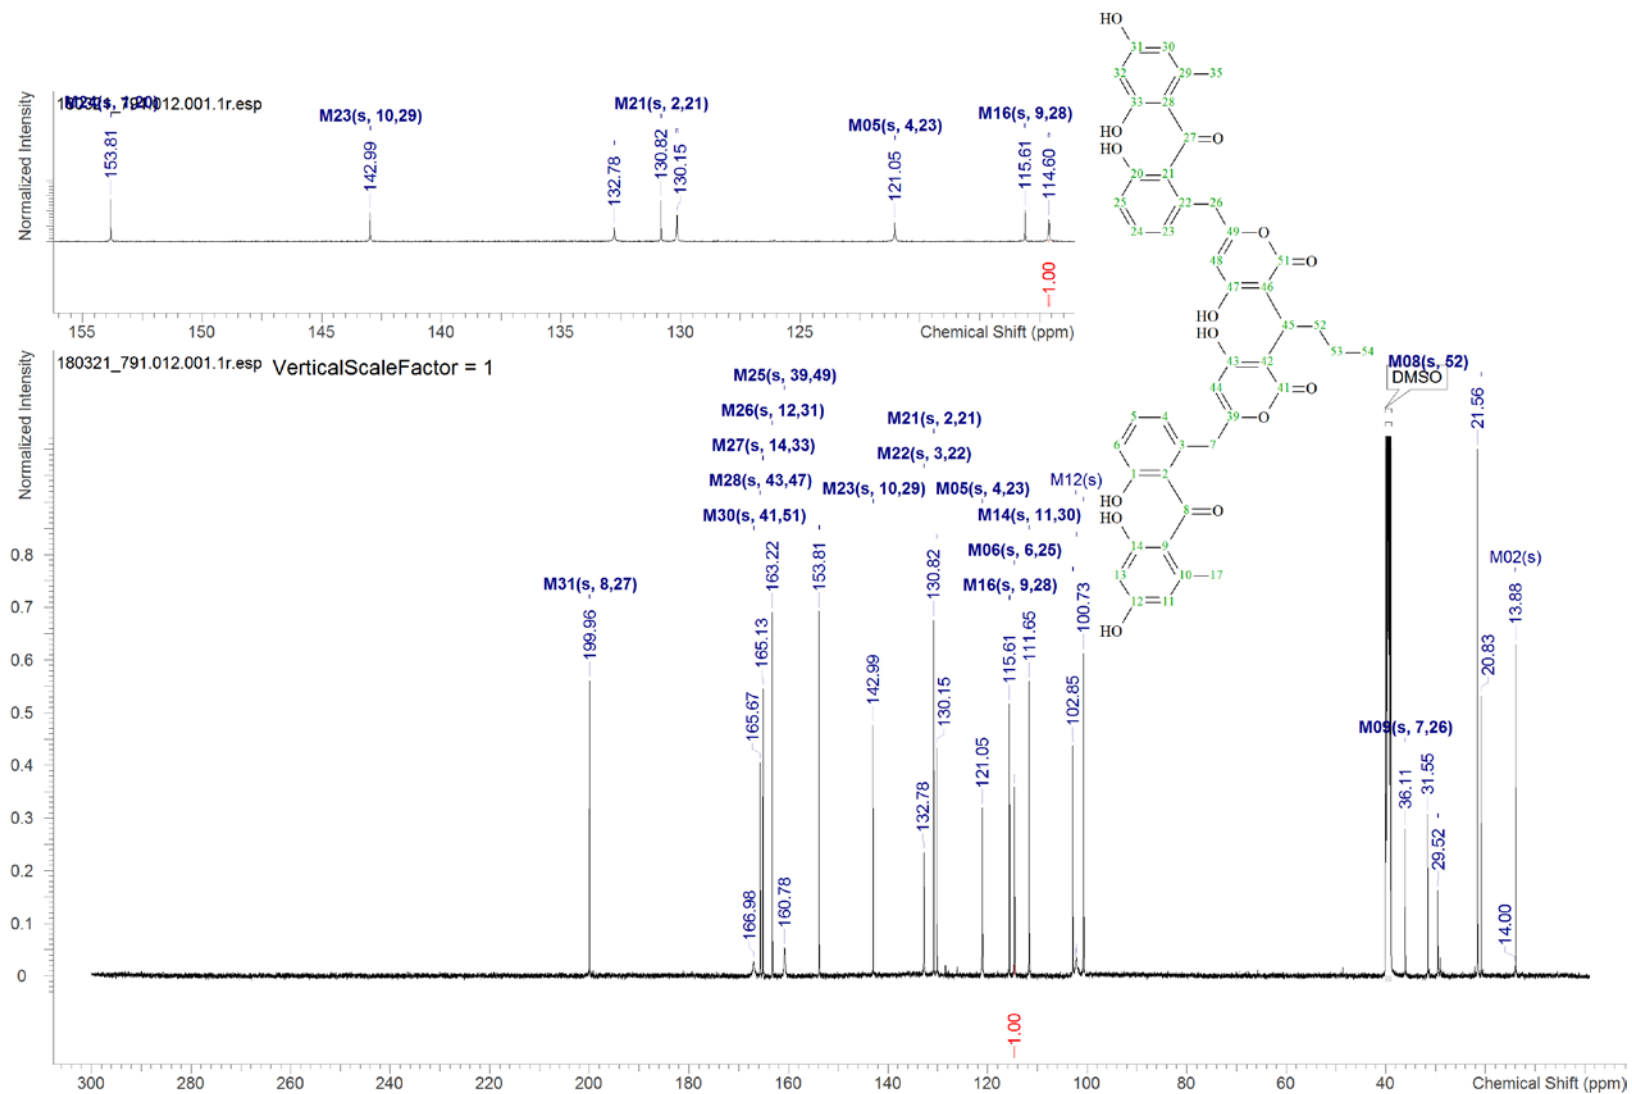

Figure S 35  $^{13}\text{C}$ -NMR spectrum (125 MHz,  $\text{DMSO-d}_6$ ) of SEK90; complete Spectrum and zoom from 155 to 113 ppm

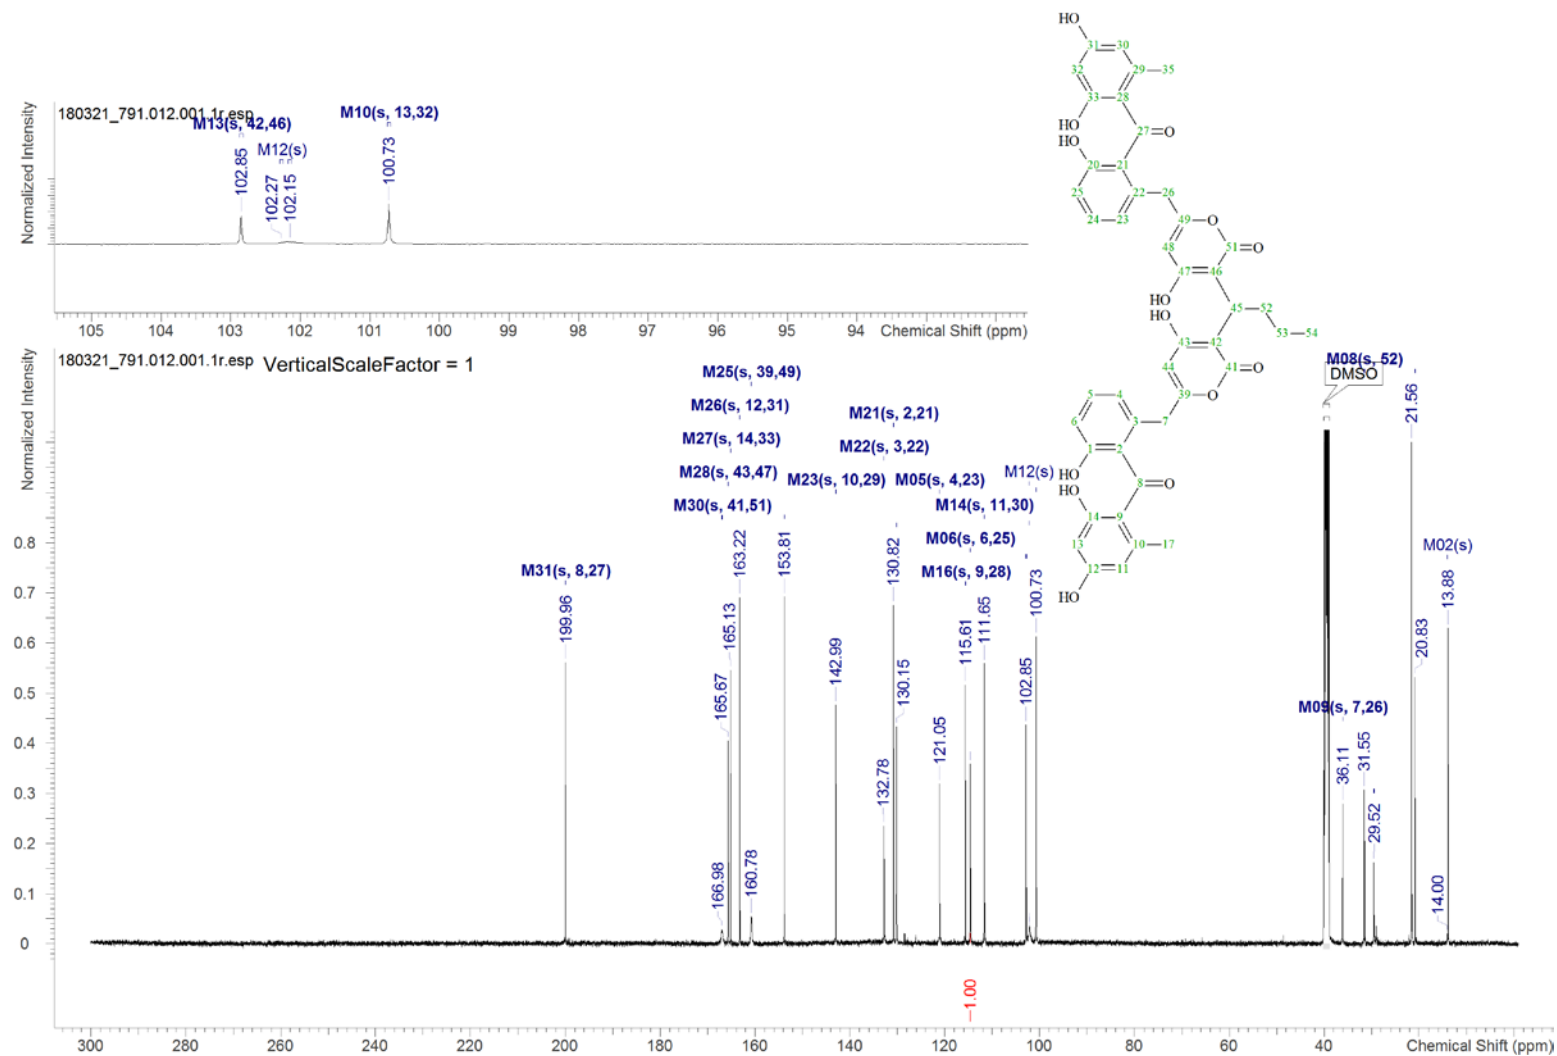

Figure S 36  $^{13}\text{C}$ -NMR spectrum (125 MHz,  $\text{DMSO-d}_6$ ) of SEK90; complete Spectrum and zoom from 105 to 92 ppm

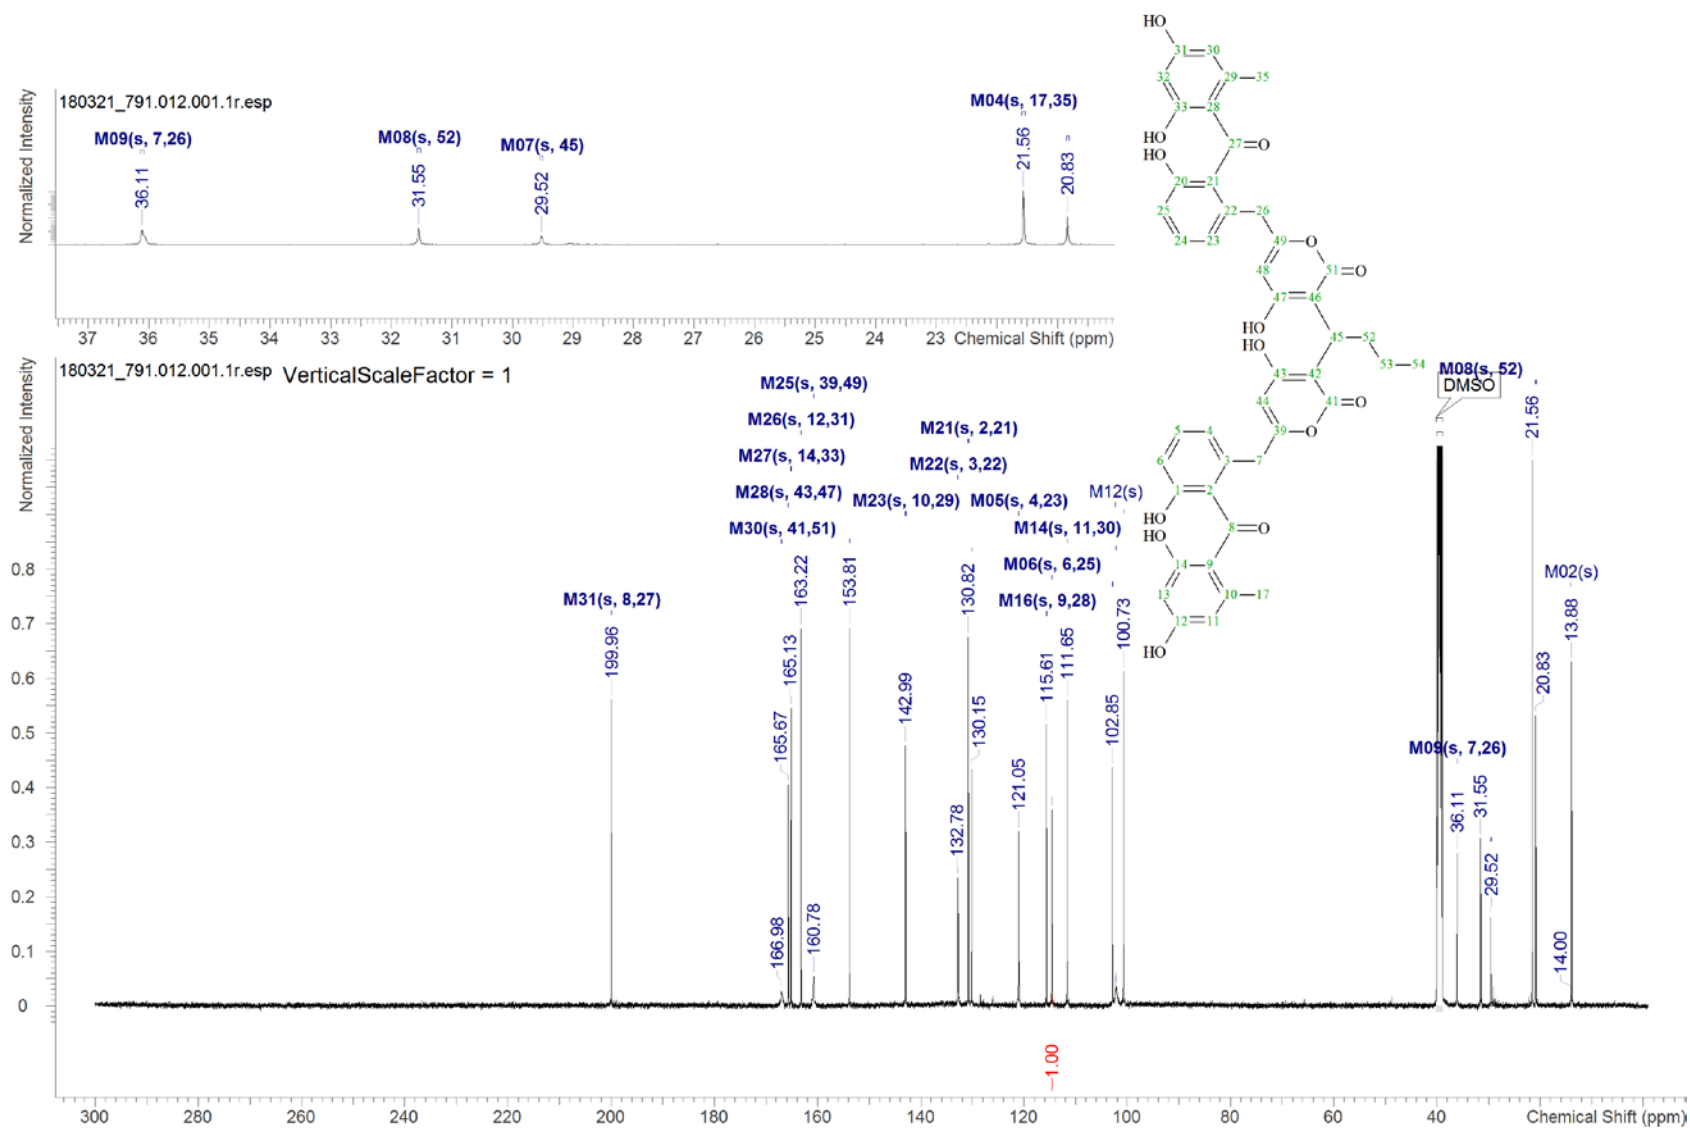

Figure S 37  $^{13}\text{C}$ -NMR spectrum (125 MHz,  $\text{DMSO-d}_6$ ) of SEK90; complete Spectrum and zoom from 37 to 20 ppm

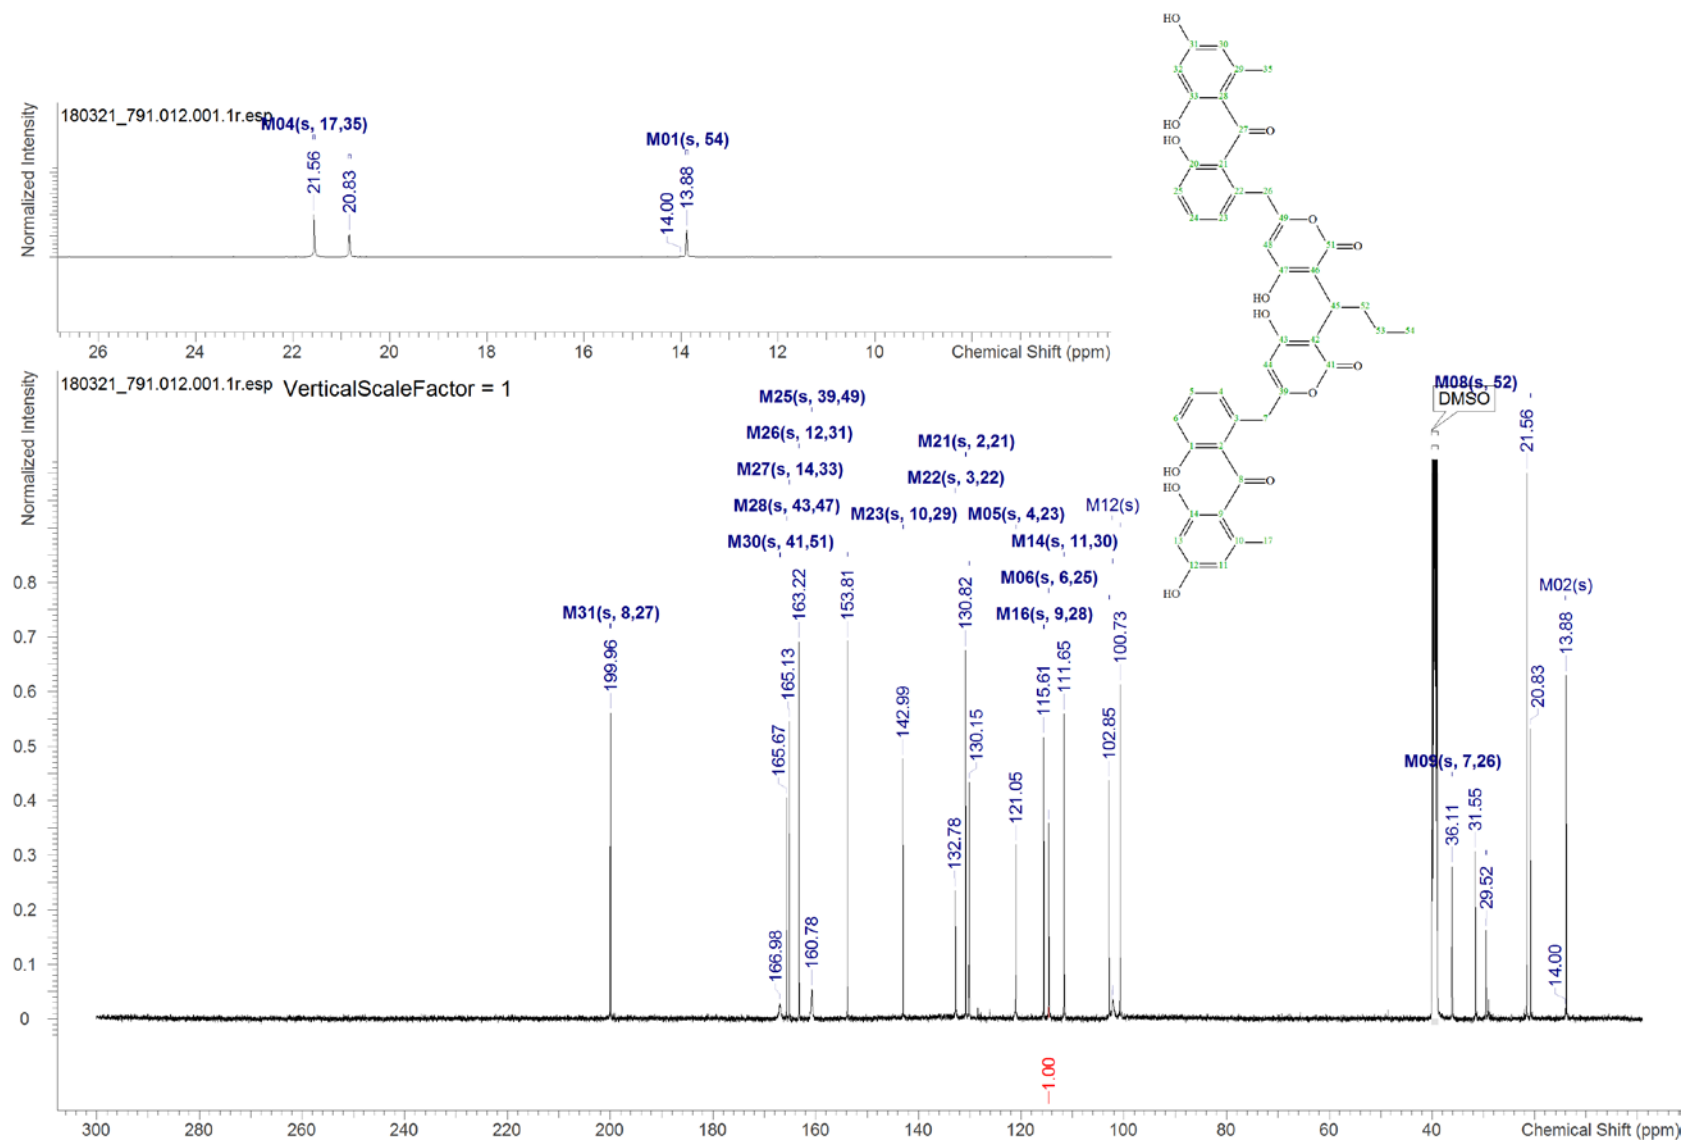

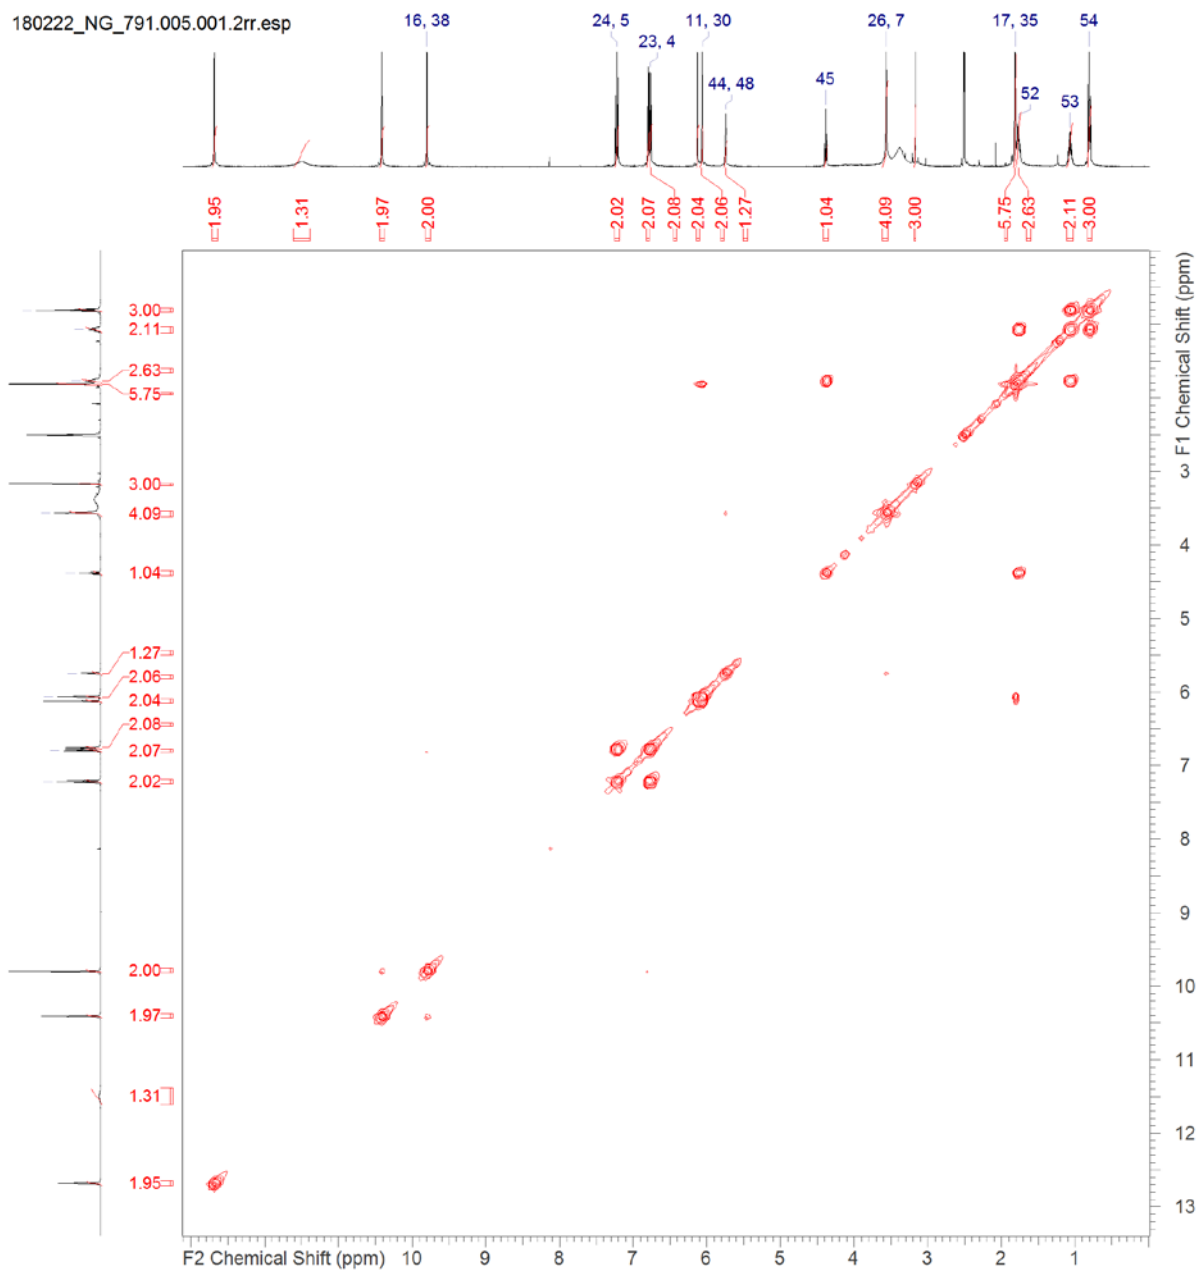

Figure S 39  $^1\text{H}$ - $^1\text{H}$ - COSY spectrum (500 MHz,  $\text{DMSO-d}_6$ ) of SEK90

180222\_NG\_791.005.001.2rr.esp

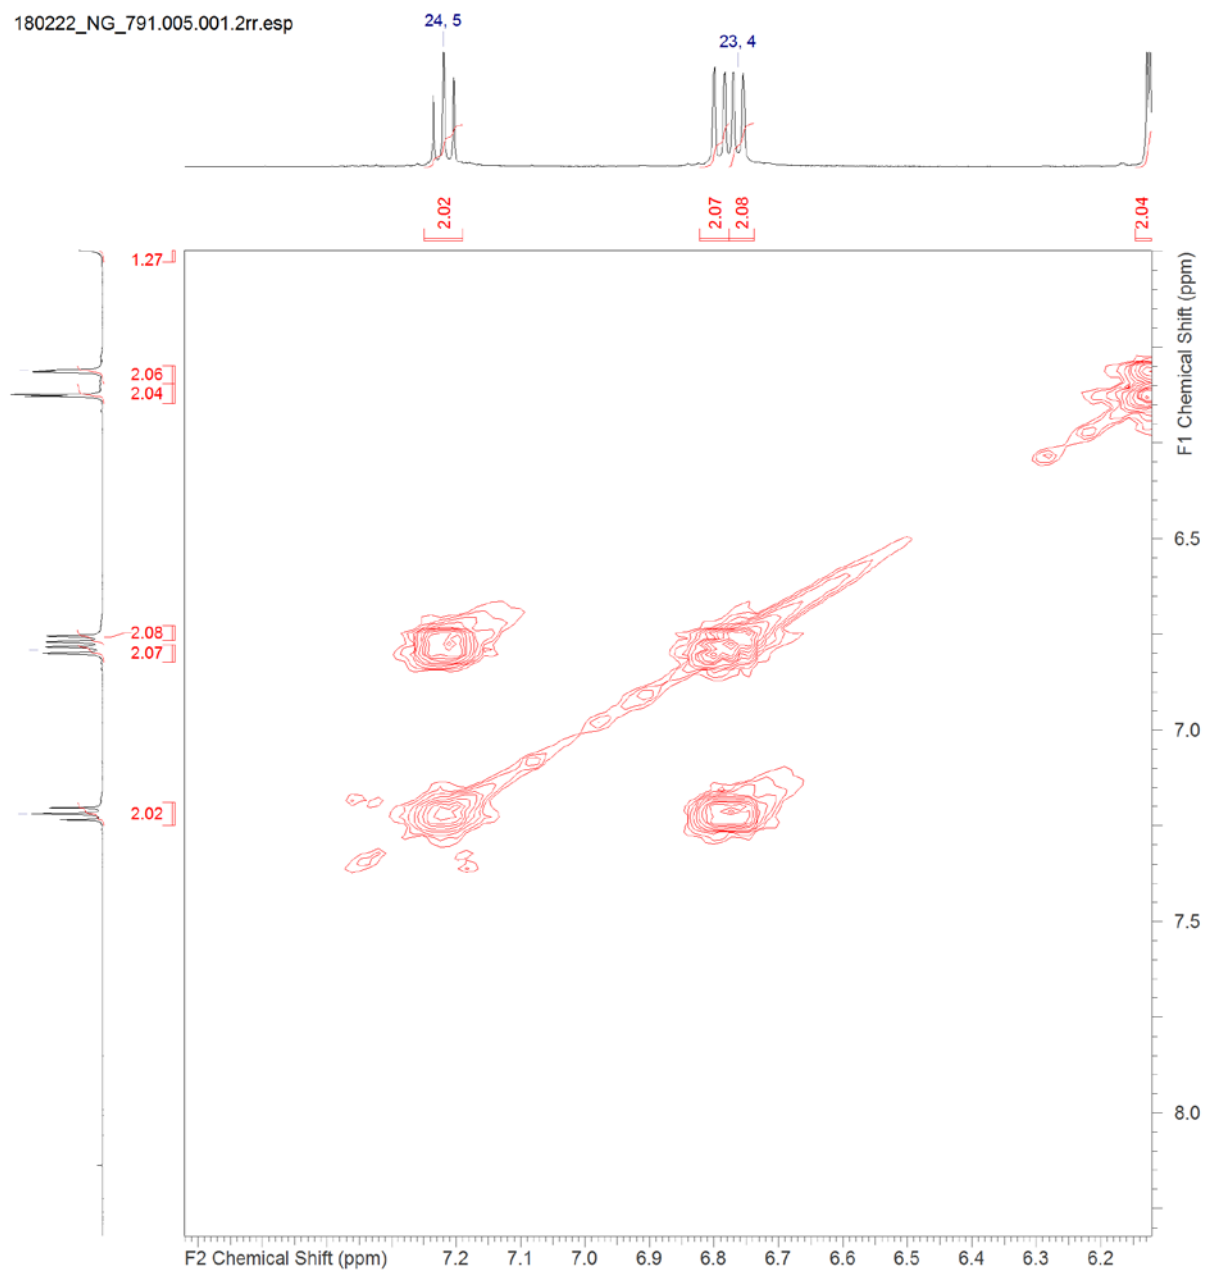

Figure S 40  $^1\text{H}$ - $^1\text{H}$ - COSY spectrum (500 MHz,  $\text{DMSO-d}_6$ ) of SEK90; zoom from 8 to 6.2 ppm

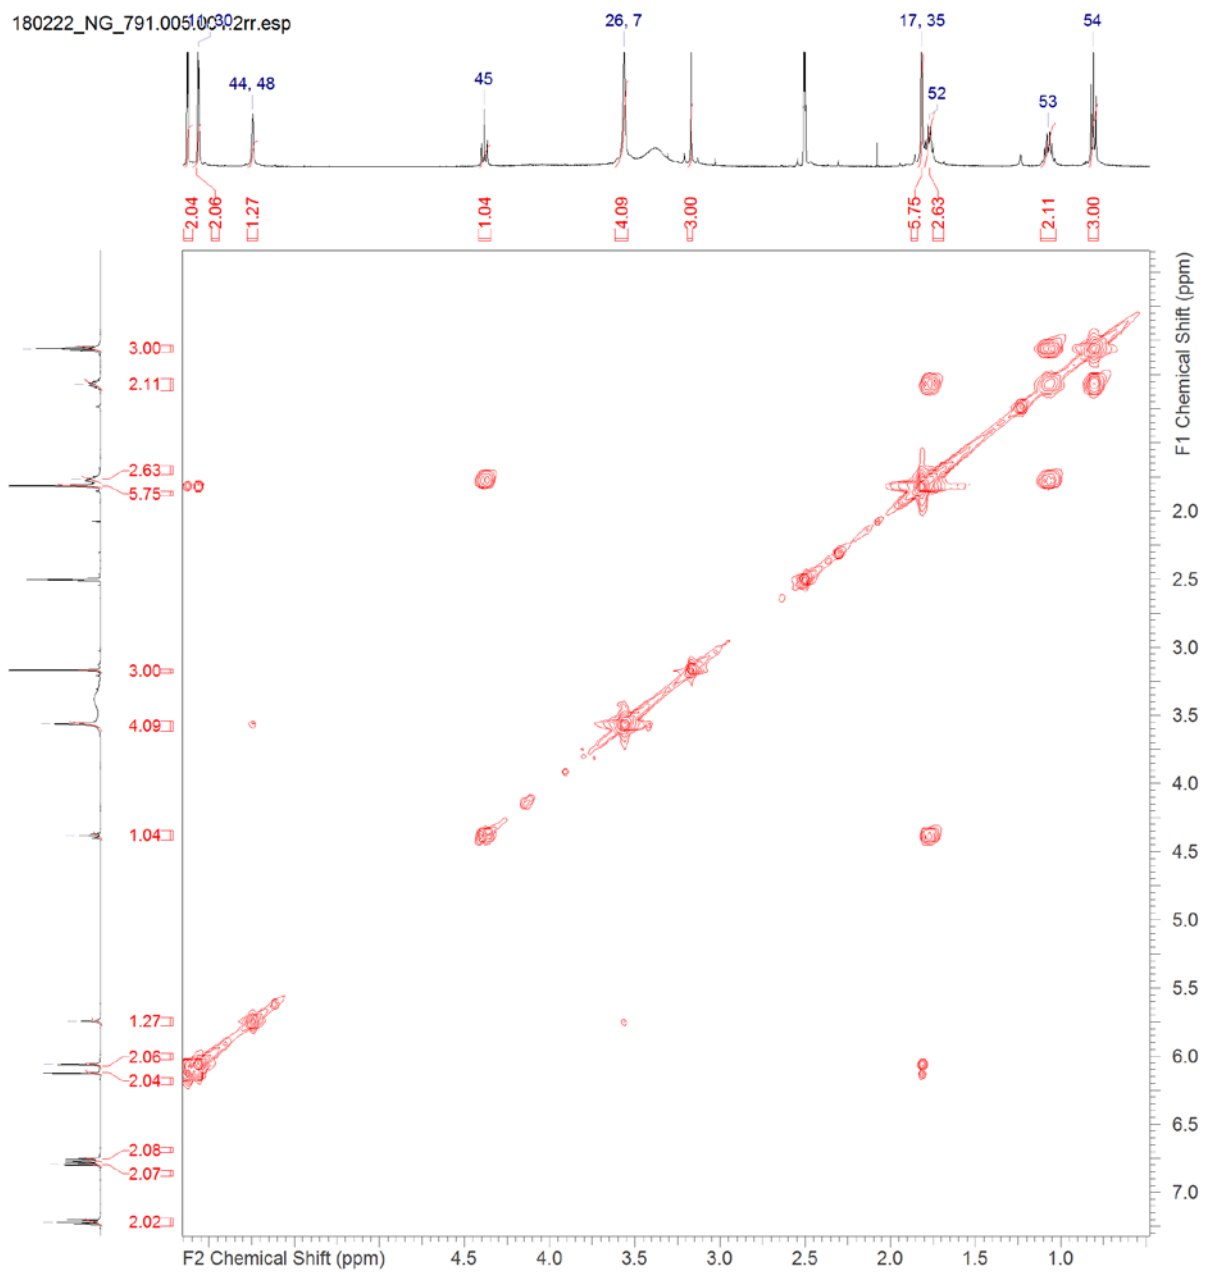

Figure S 41  $^1\text{H}$ - $^1\text{H}$ - COSY spectrum (500 MHz, DMSO- $d_6$ ) of SEK90; zoom from 7 to 0.5 ppm

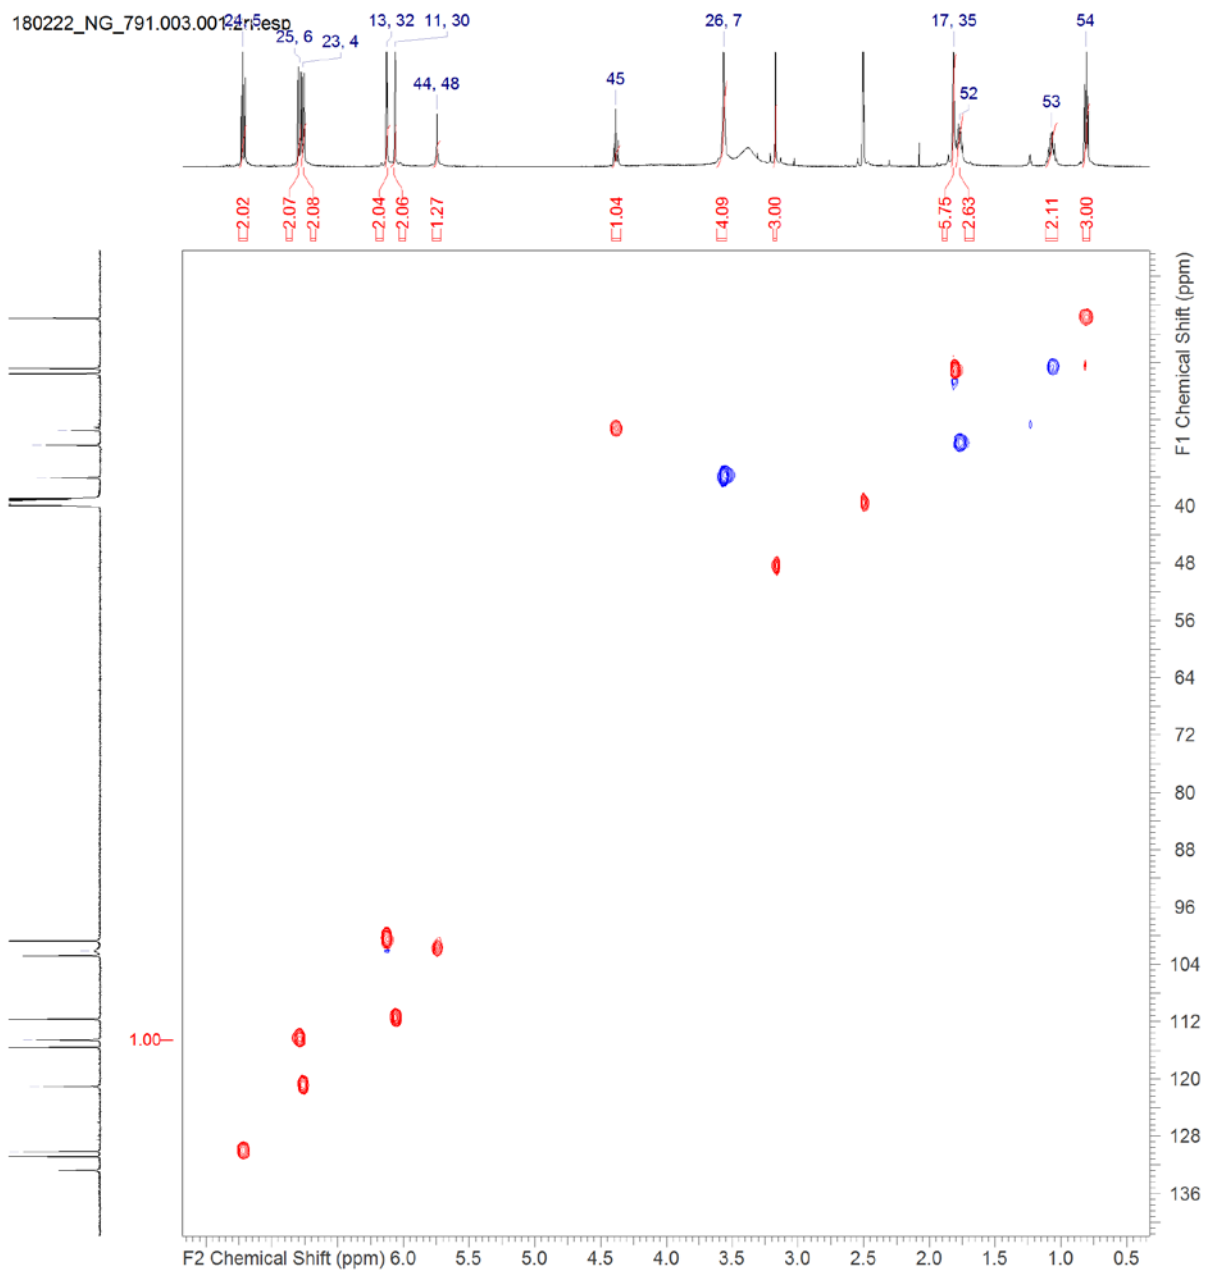

Figure S 42 HSQC-spectrum (500 MHz; 125 MHz, DMSO-d<sub>6</sub>) of SEK90



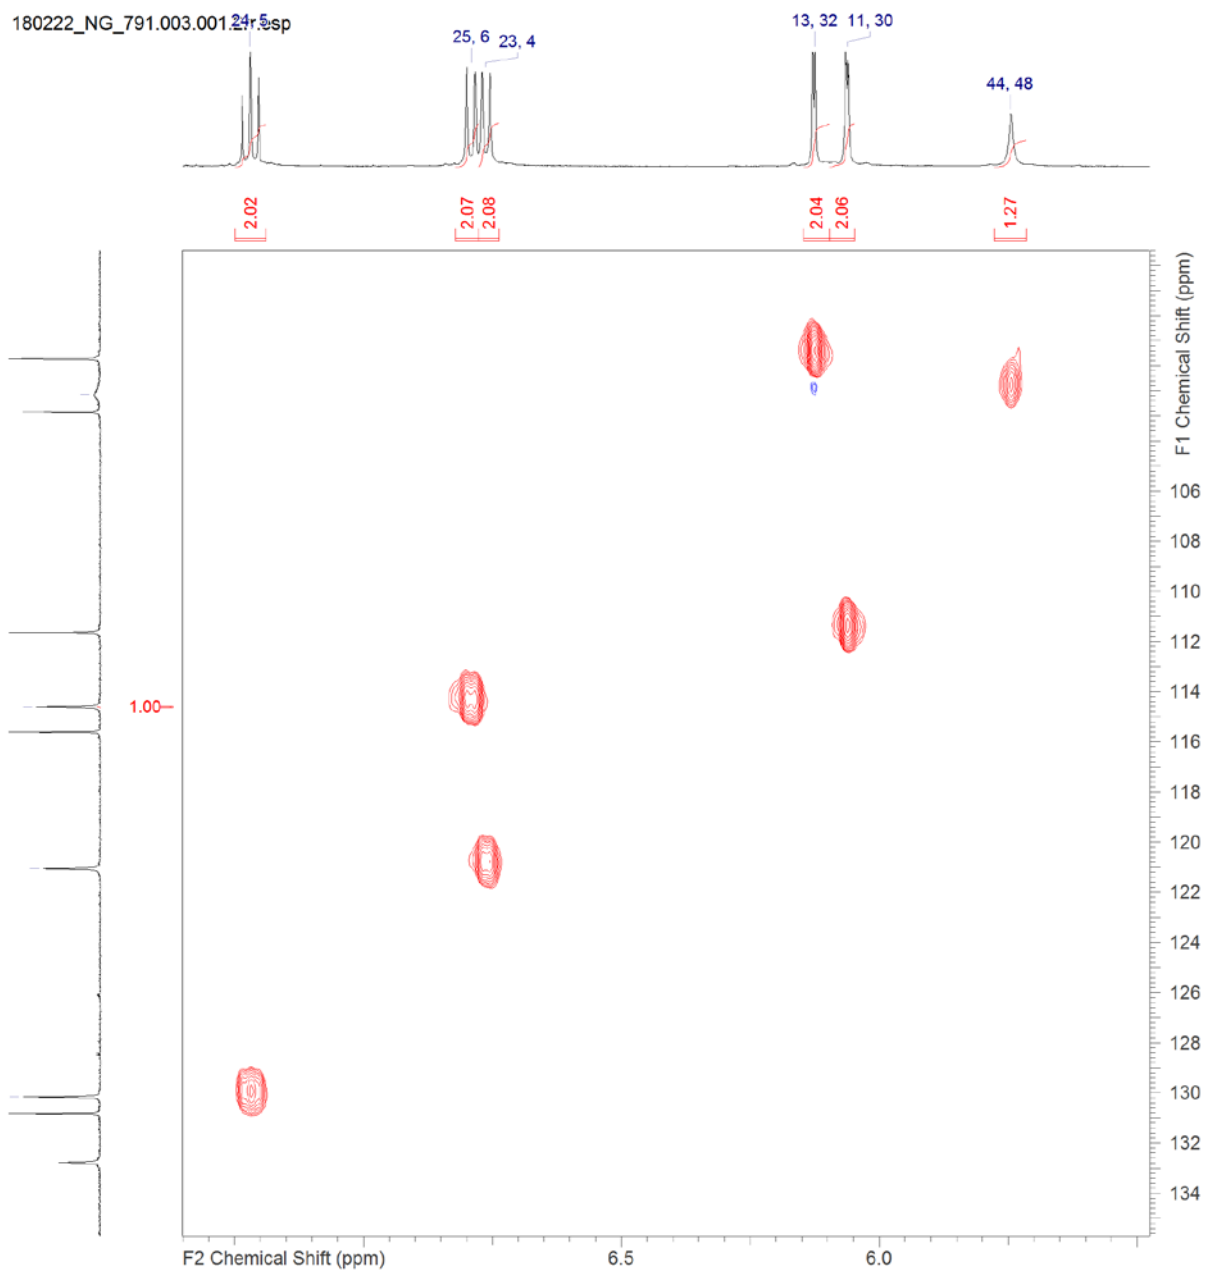

Figure S 43 HSQC-spectrum (500 MHz; 125 MHz, DMSO-d<sub>6</sub>) of SEK90; zoom from 7.5 to 5.5 ppm and 135 to 99 ppm

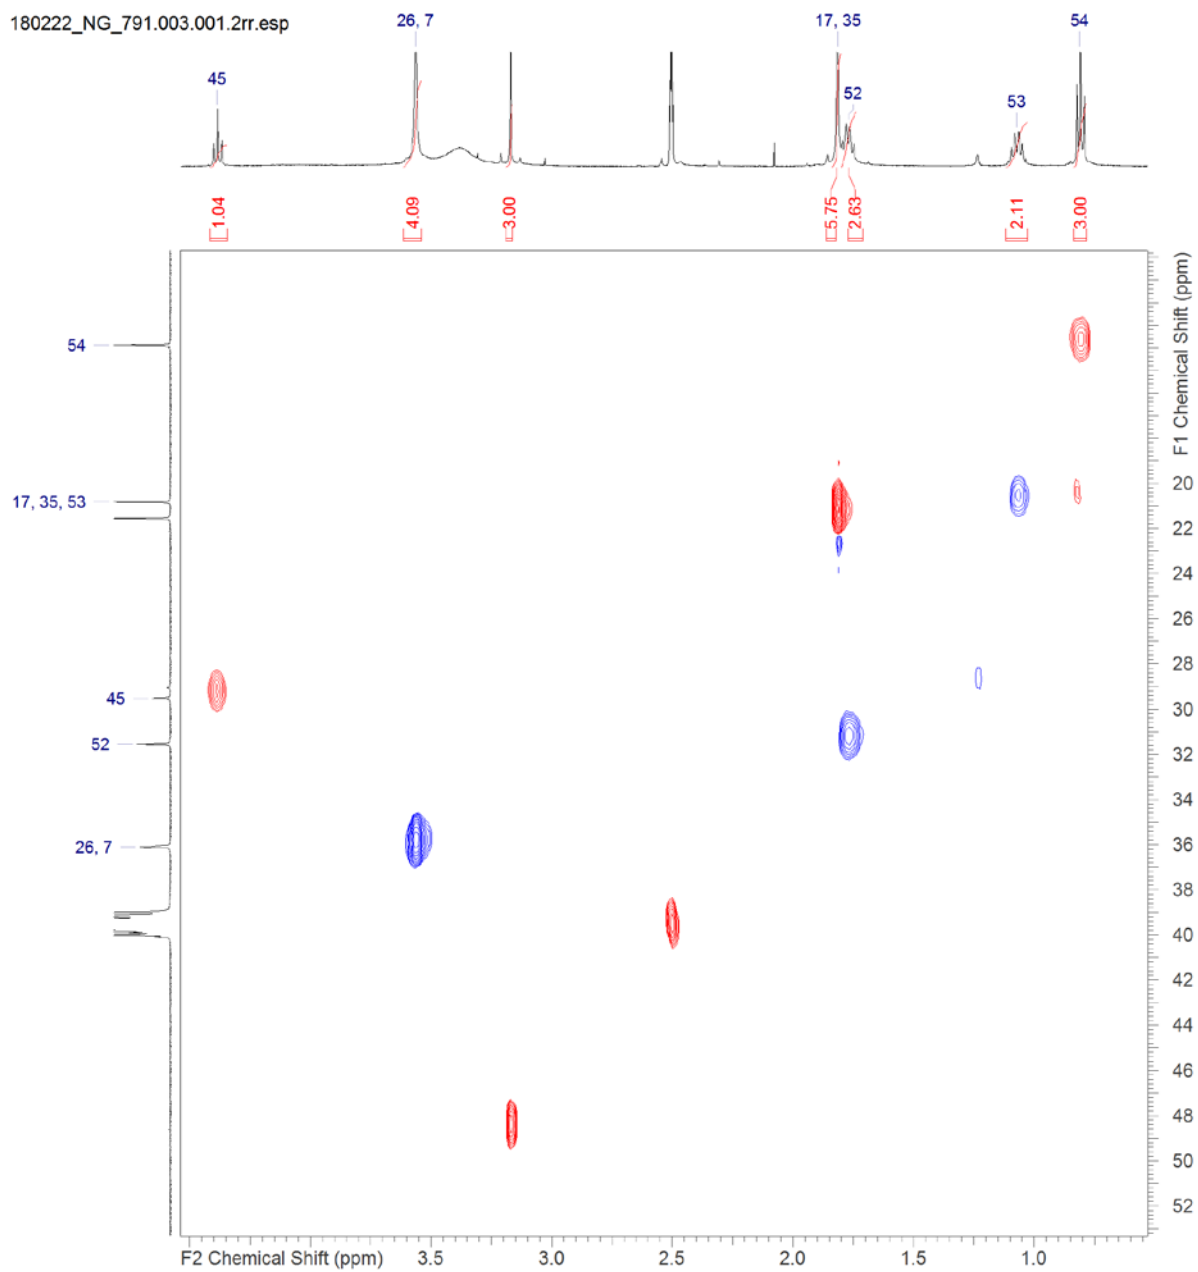

Figure S 44 HSQC-spectrum (500 MHz; 125 MHz, DMSO-d<sub>6</sub>) of SEK90; zoom from 4 to 0,5 ppm and 53 to 16 ppm

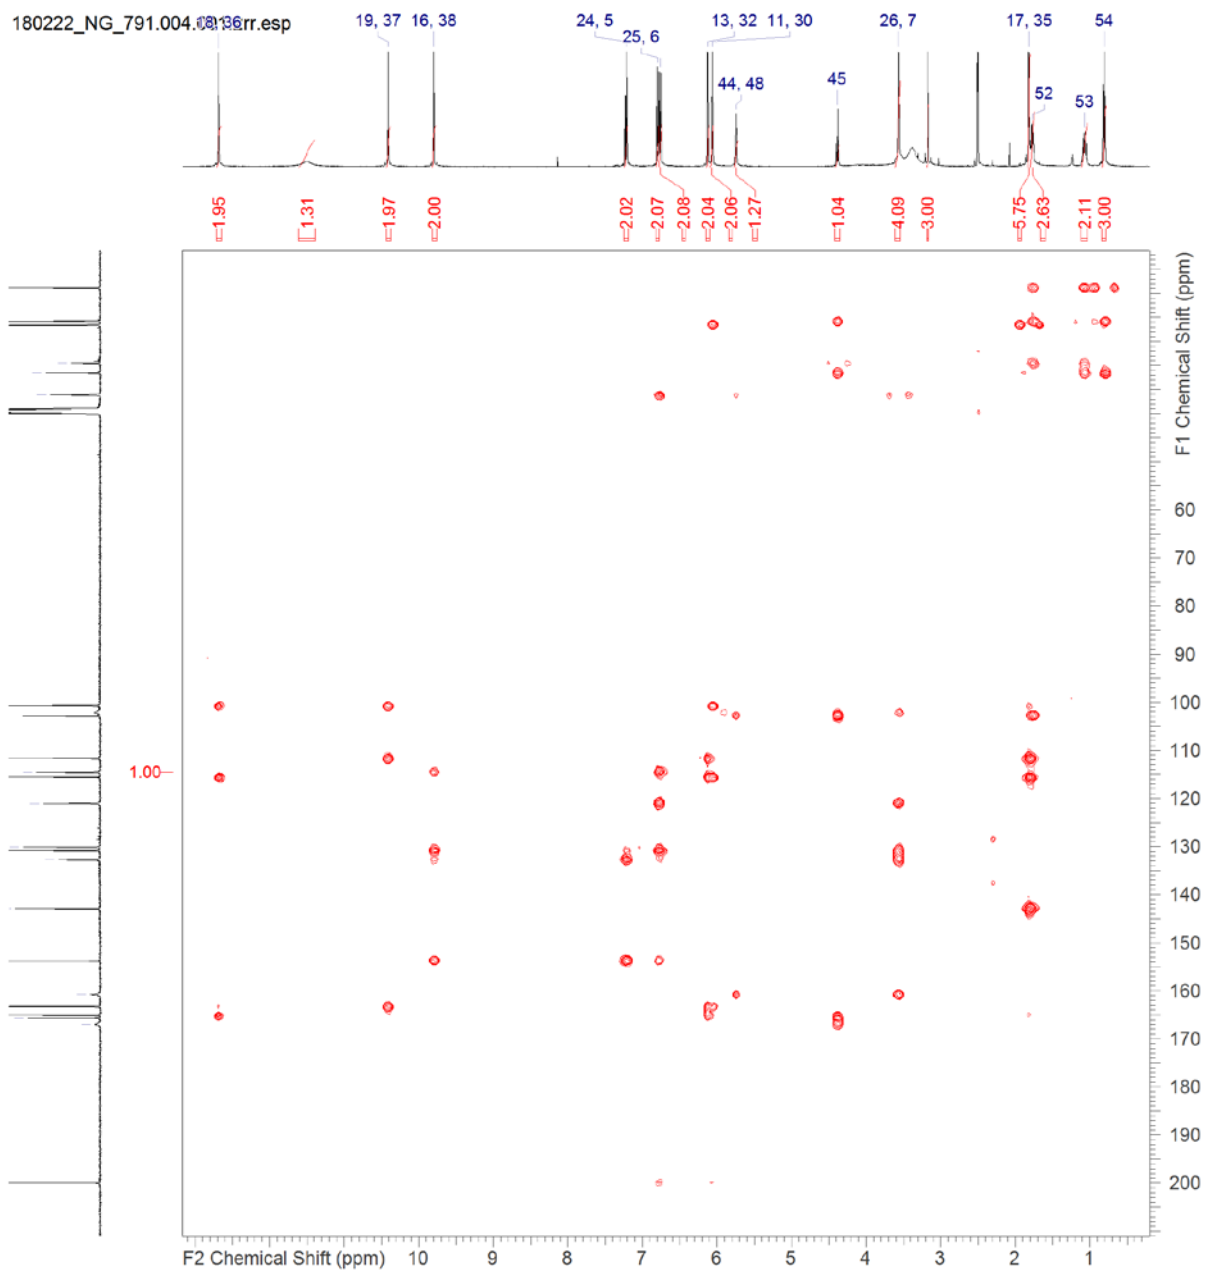

Figure S 45 HSQC-spectrum (500 MHz; 125 MHz, DMSO-d<sub>6</sub>) of SEK90; zoom from 4 to 0.5 ppm and 53 to 16 ppm

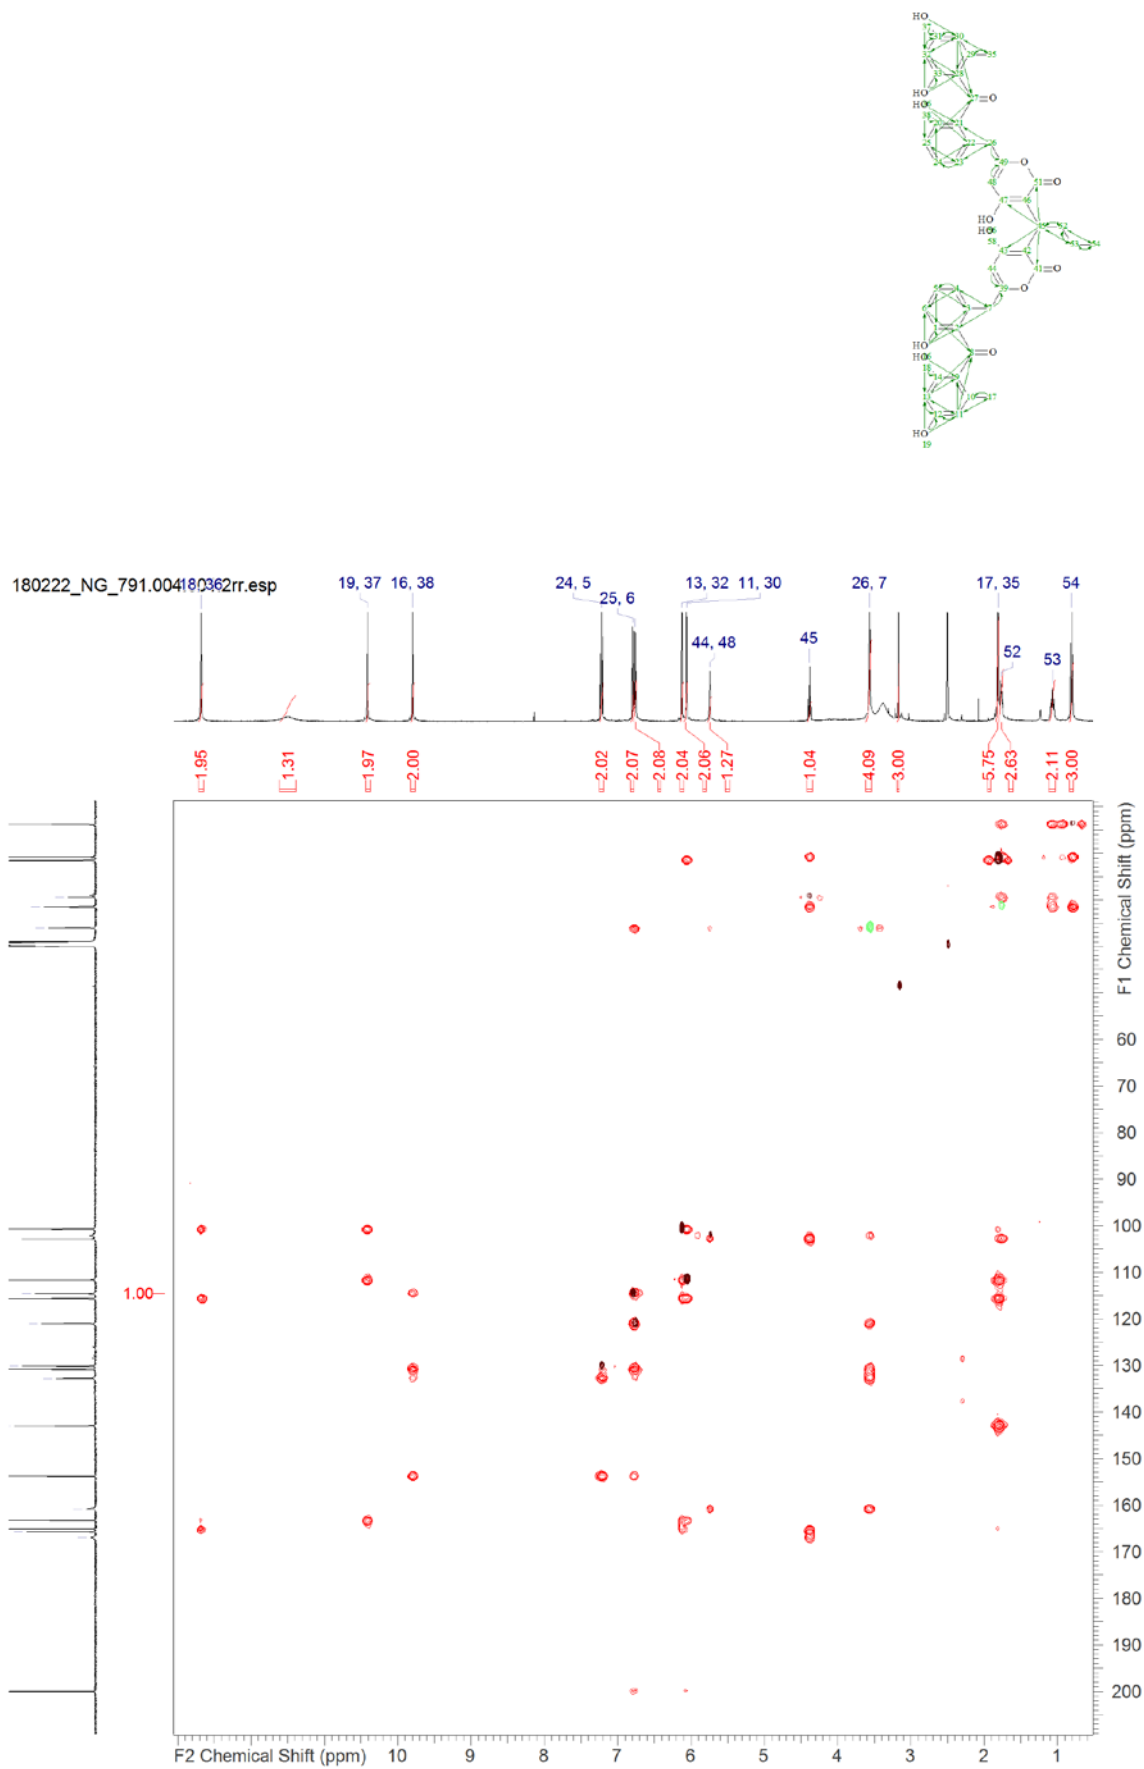

Figure S 46 HMBC - HSQC-Overlay spectrum (500 MHz; 125 MHz, DMSO-d<sub>6</sub>) of SEK90 (red: HMBC; black/green: HSQC)

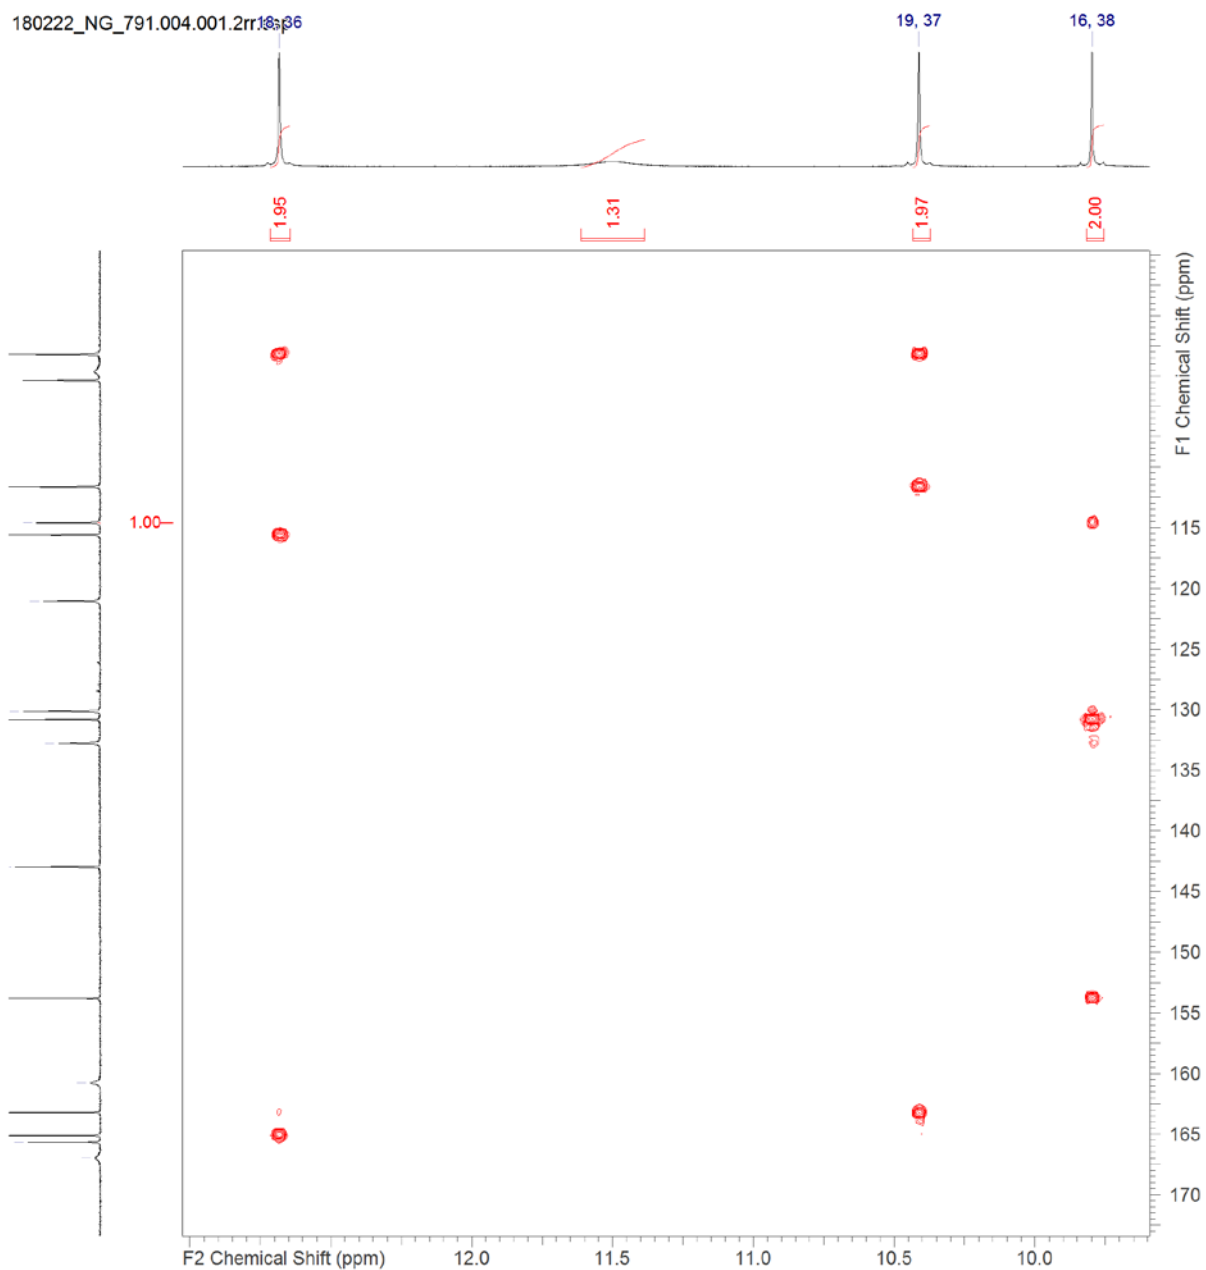

Figure S 47 HMBC - HSQC-Overlay spectrum (500 MHz; 125 MHz, DMSO-d<sub>6</sub>) of SEK90 (black: HMBC; red/blue: HSQC); zoom from 13 to 10 ppm and 170 to 105 ppm

180222\_NG\_791.004.001.2rr.esp

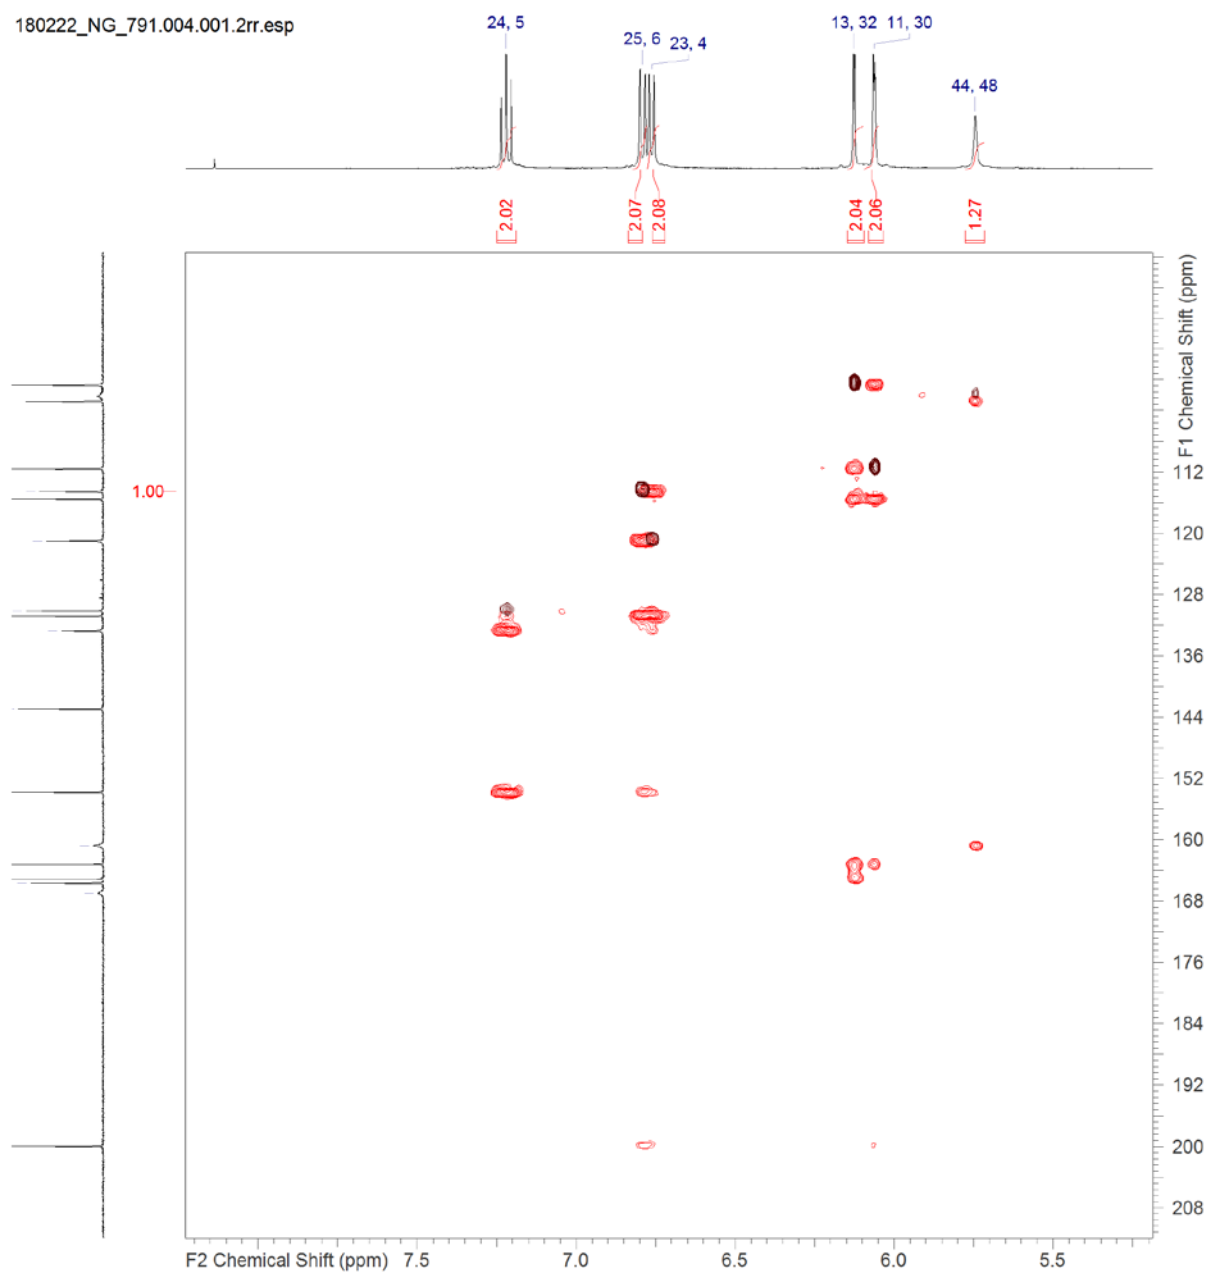

Figure S 48 HMBC - HSQC-Overlay spectrum (500 MHz; 125 MHz, DMSO-d<sub>6</sub>) of SEK90 (black: HMBC; red/blue: HSQC); zoom from 13 to 10 ppm and 170 to 105 ppm

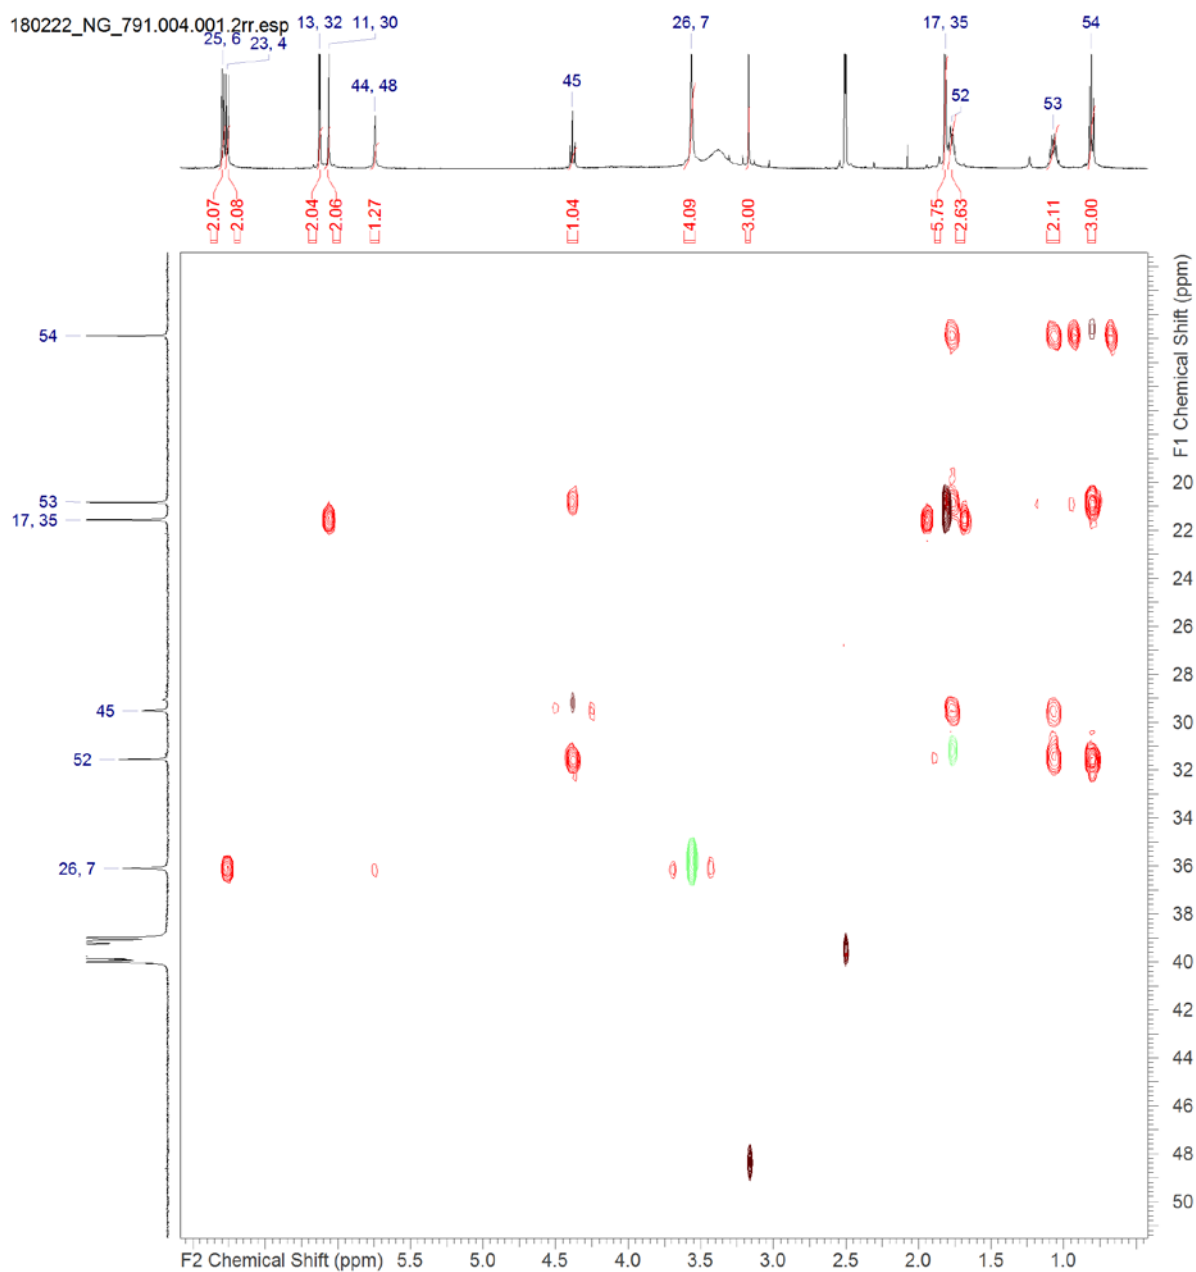

Figure S 49 HMBC - HSQC-Overlay spectrum (500 MHz; 125 MHz, DMSO-d<sub>6</sub>) of SEK90 (black: HMBC; red/blue: HSQC); zoom from 6.5 to 0.5 ppm and 51 to 10 ppm

180222\_NG\_791.004.001.2rr.esp

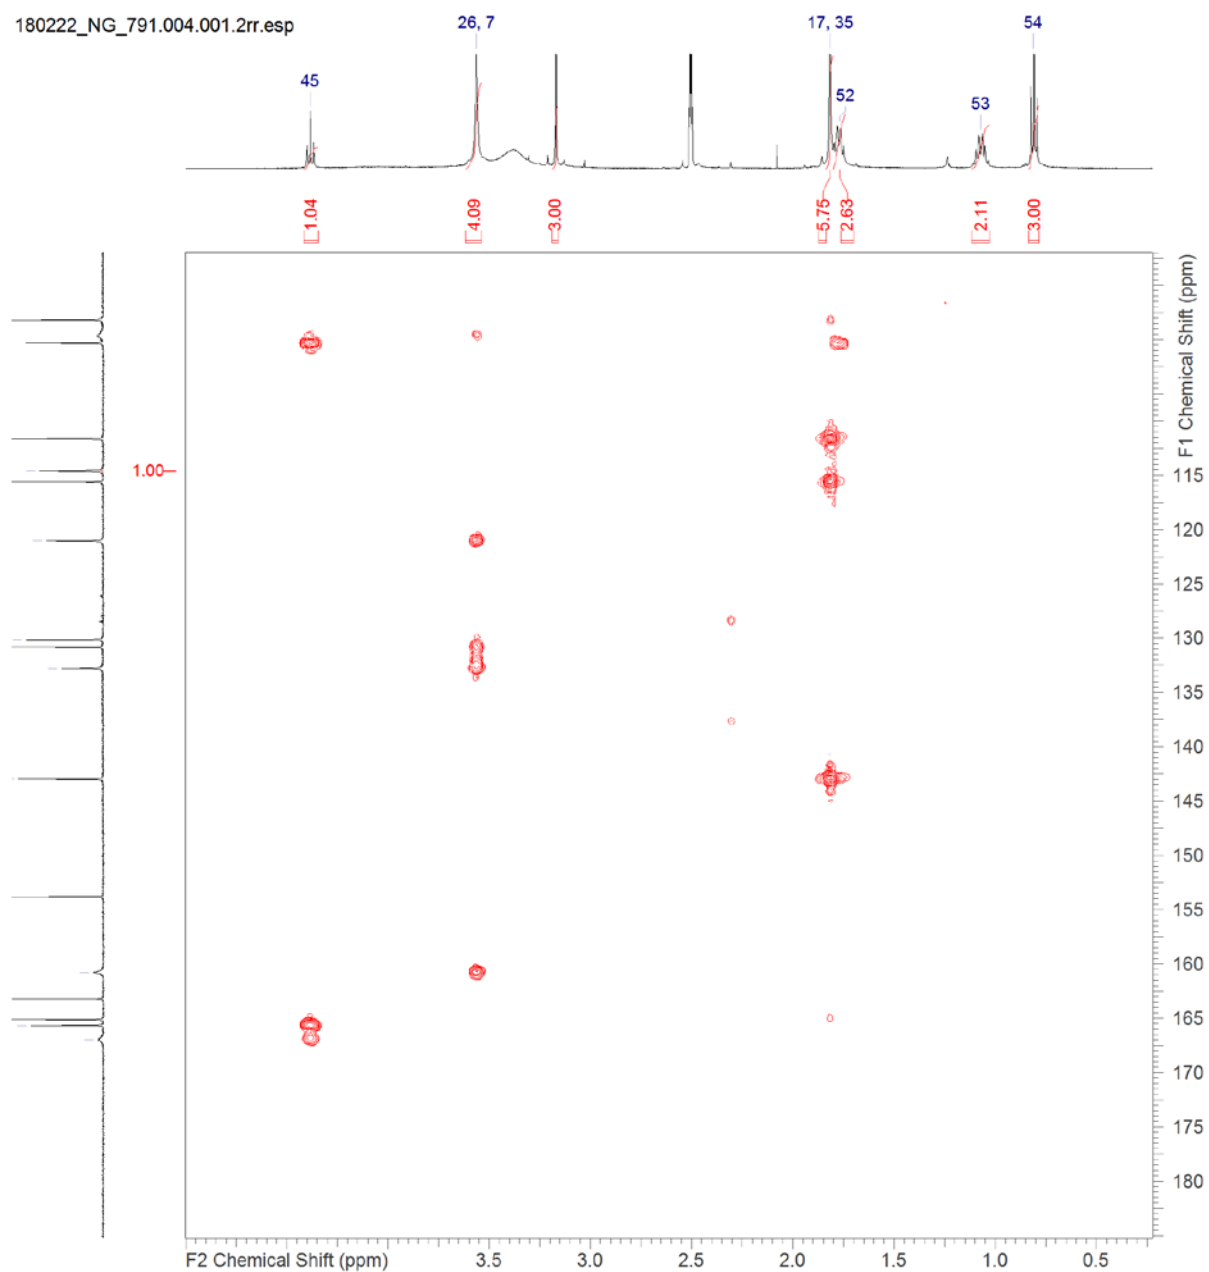

Figure S 50 HMBC - HSQC-Overlay spectrum (500 MHz; 125 MHz, DMSO-d<sub>6</sub>) of SEK90 (black: HMBC; red/blue: HSQC); zoom from 4.5 to 0.5 ppm and 185 to 100 ppm



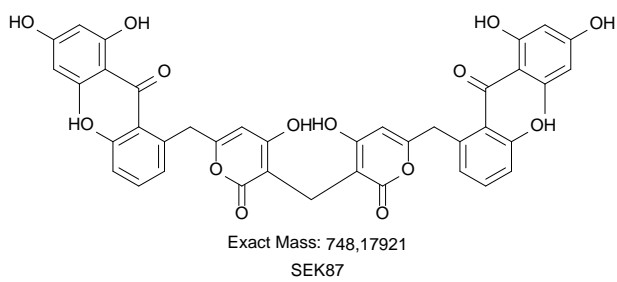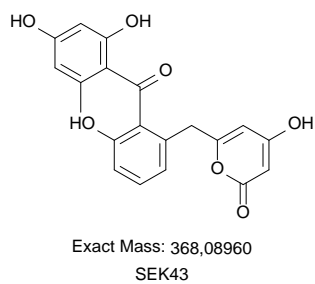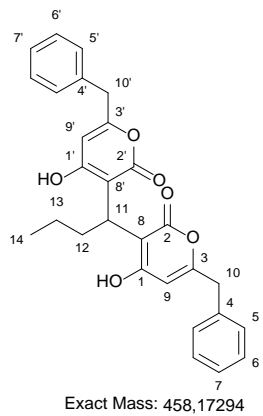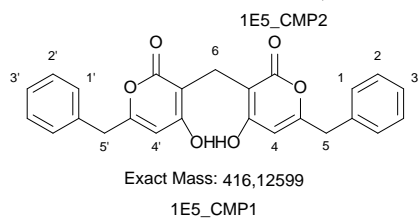

Figure S 51 Structures of SEK87, SEK43 and 1E5\_CMP1 & 1E5\_CMP2

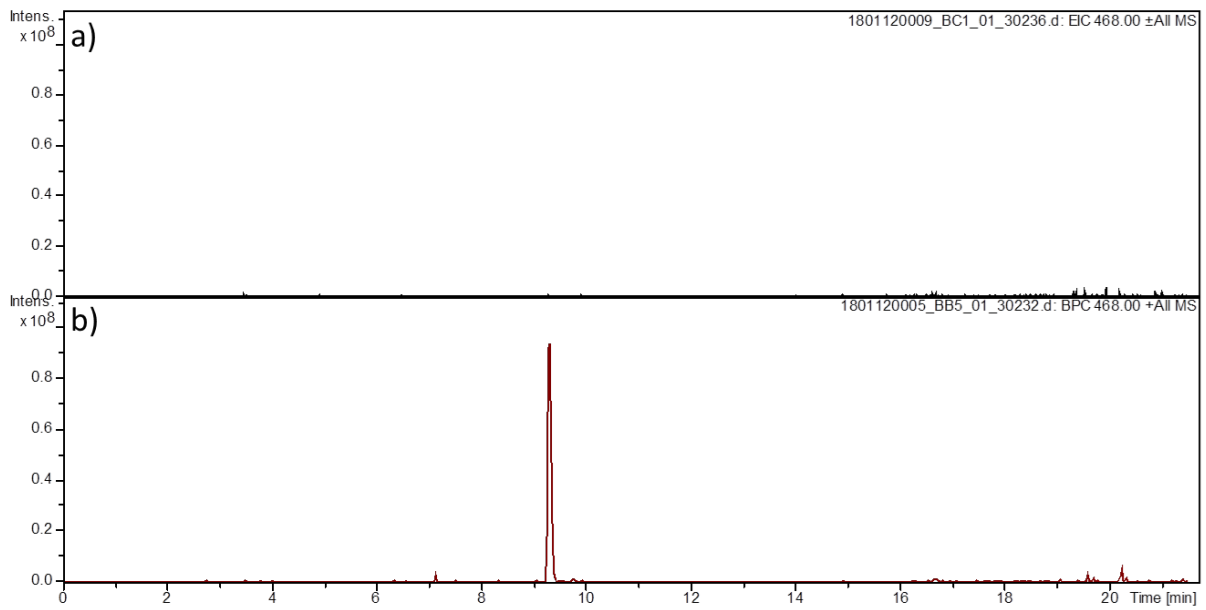

Figure S 52 HPLC-MS Extracted ion chromatogram (Extracted mass  $468\pm 0.5$ ) of a) *S. lividans*  $\Delta$ YA6\_1E5 $\Delta$ 54860 and b) *S. lividans*  $\Delta$ YA6\_1E5 $\Delta$ 55110; The production is unchanged in the deletion of the NRPS/PKSI hybrid core gene, while the production is abolished in the created mutant lacking the type II PKS gene

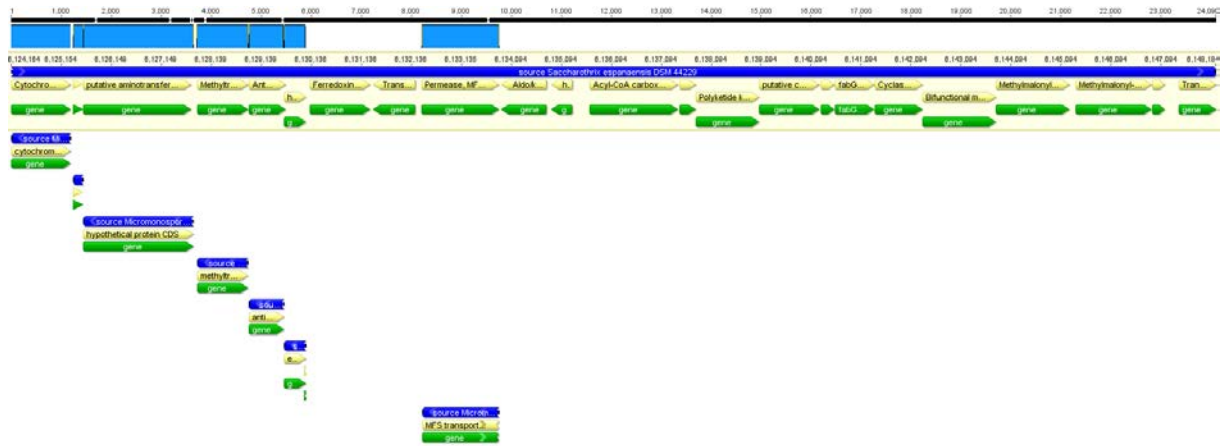

Figure S 53 Genes (WP\_124773686 & WP\_124773691-WP124773694) of *Micromonospora* sp. LB39 mapped to Pentangumycins biosynthetic gene cluster

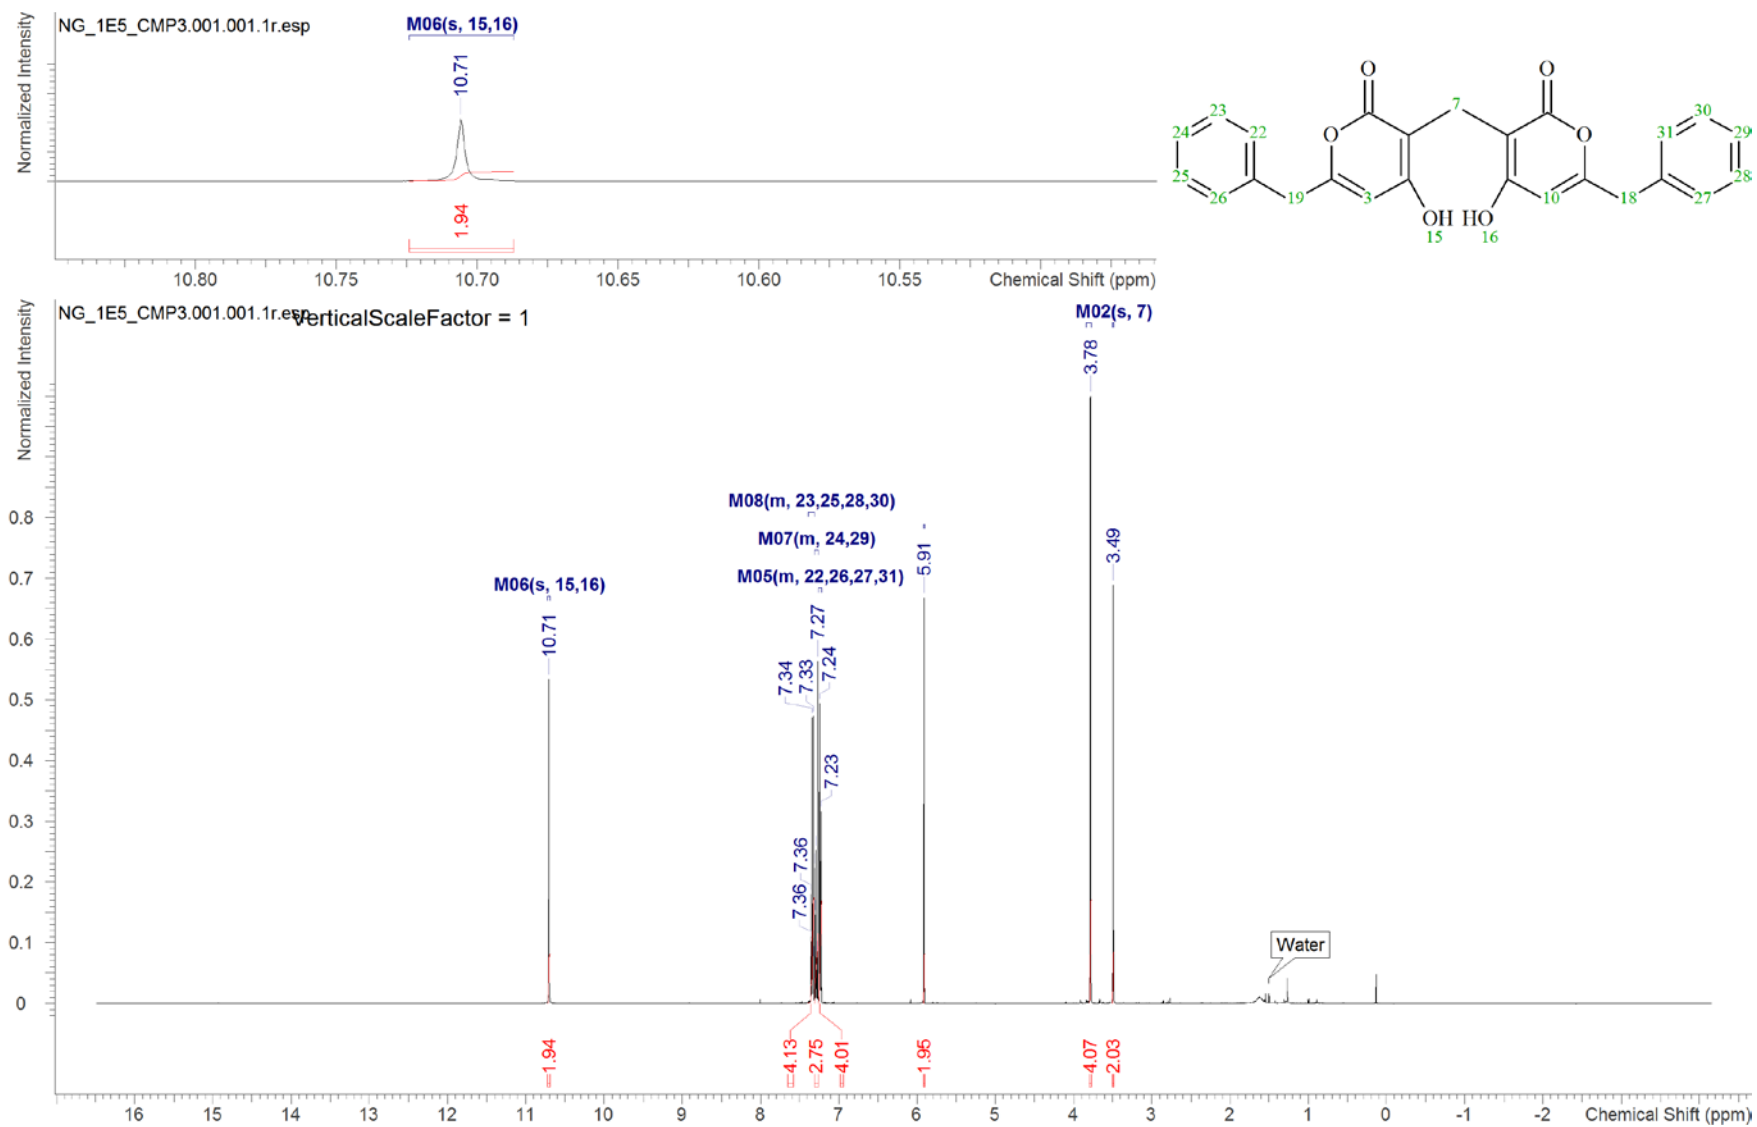

Figure S 54 <sup>1</sup>H-NMR spectrum (500 MHz, CDCl<sub>3</sub>) of 1E5\_CMP1; zoom from 10.8 ppm to 10.5 ppm

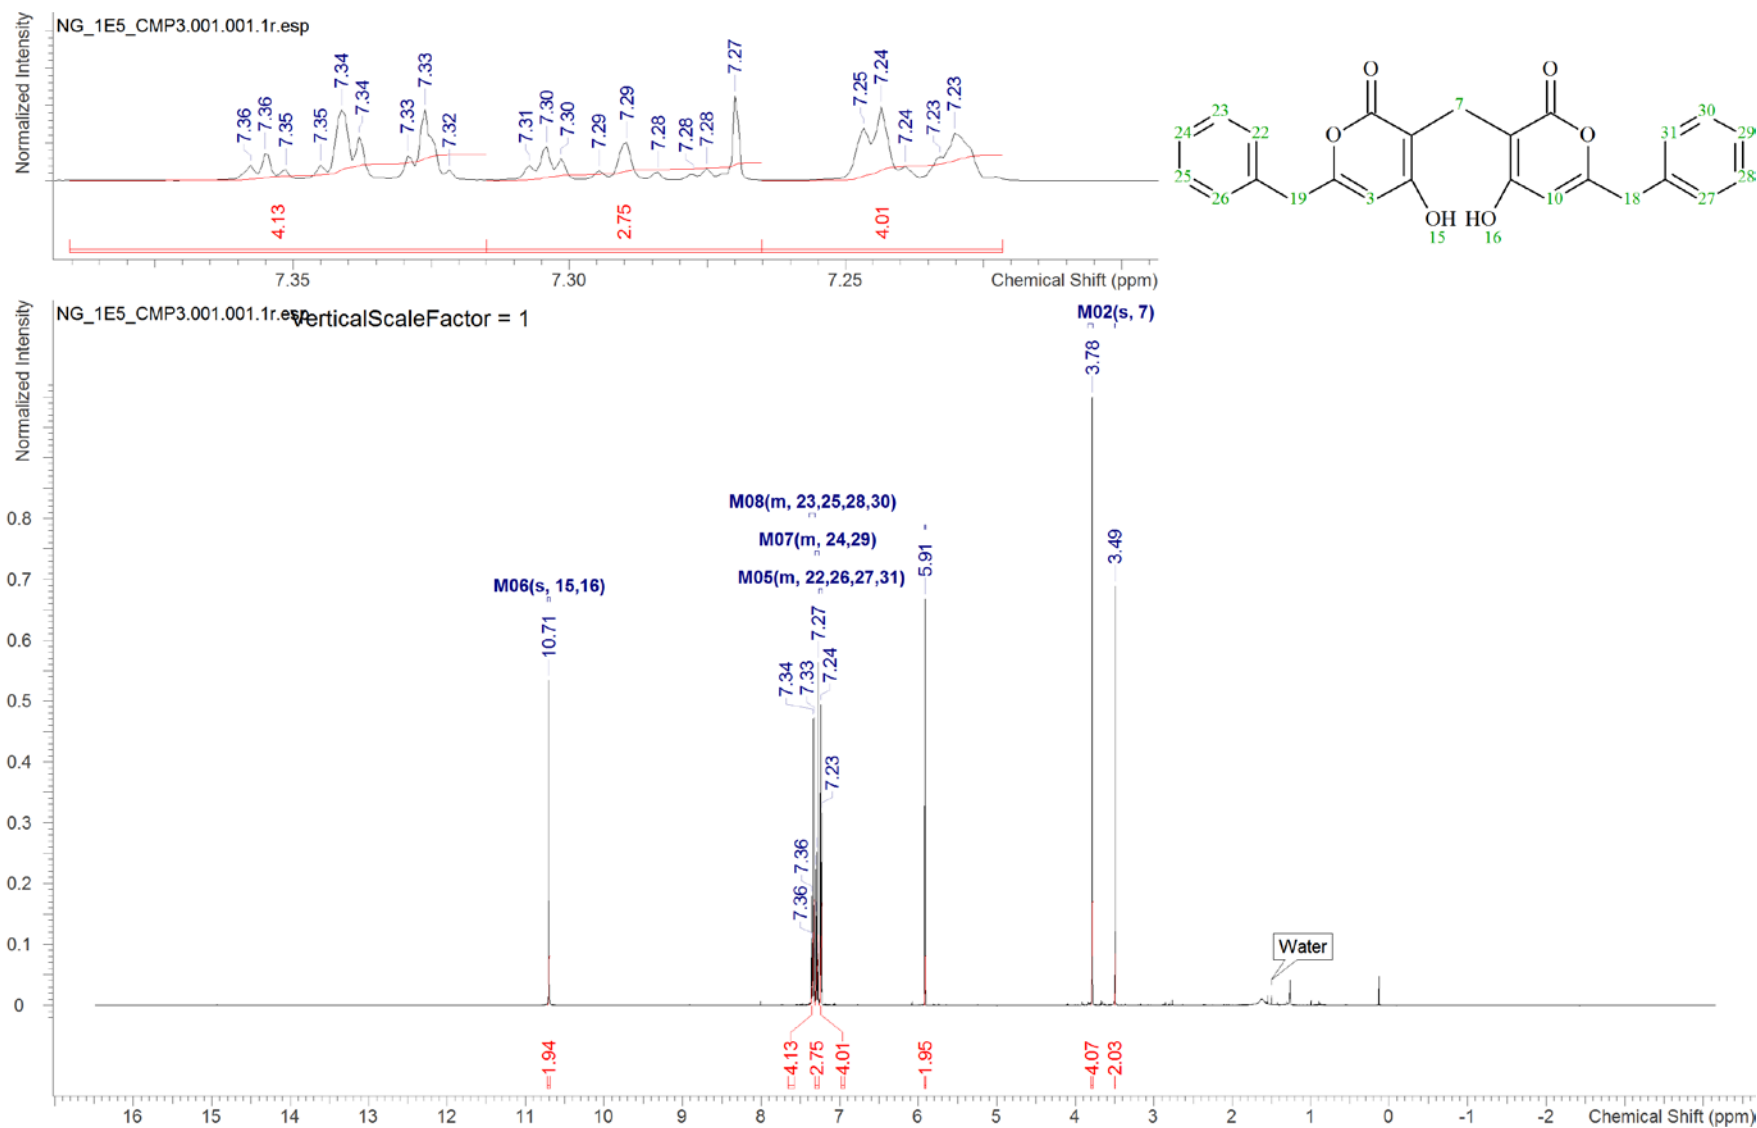

Figure S 55  $^1\text{H-NMR}$  spectrum (500 MHz,  $\text{CDCl}_3$ ) of 1E5\_CMP1; zoom from 7.4 ppm to 7.2 ppm

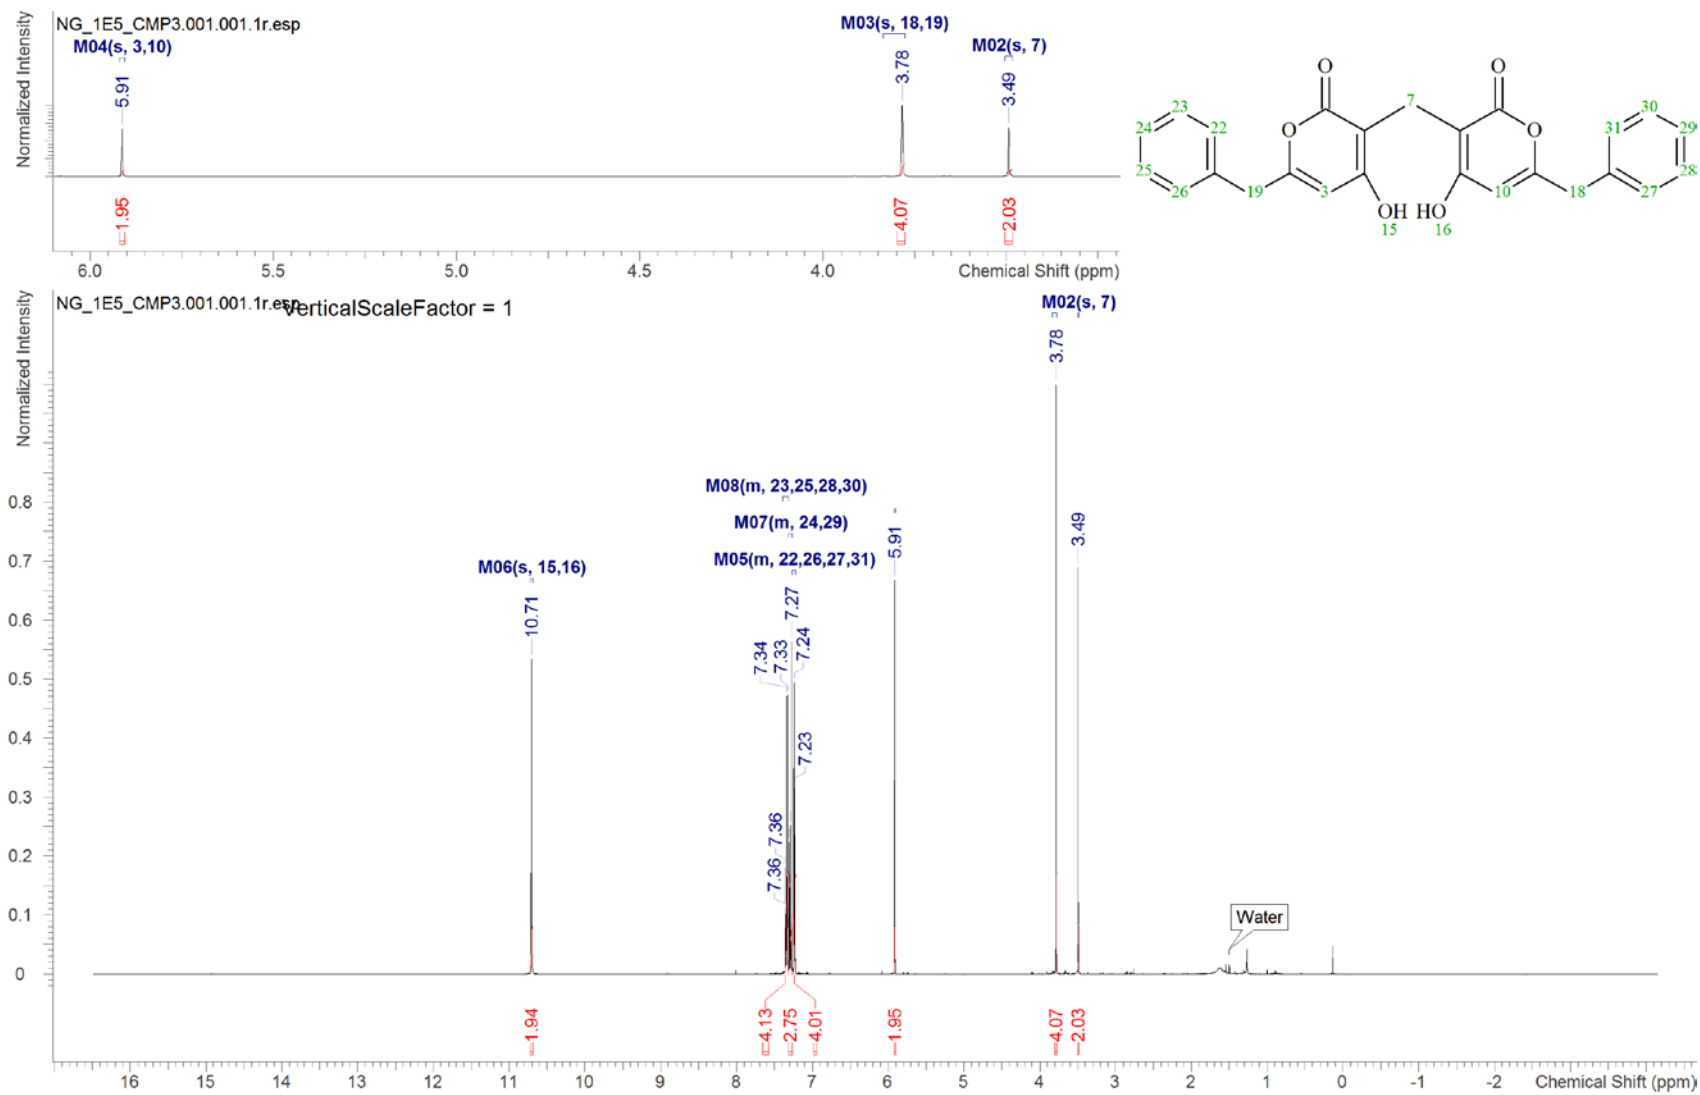

Figure S 56  $^1\text{H-NMR}$  spectrum (500 MHz,  $\text{CDCl}_3$ ) of 1E5\_CMP1; zoom from 6 ppm to 3.5 ppm

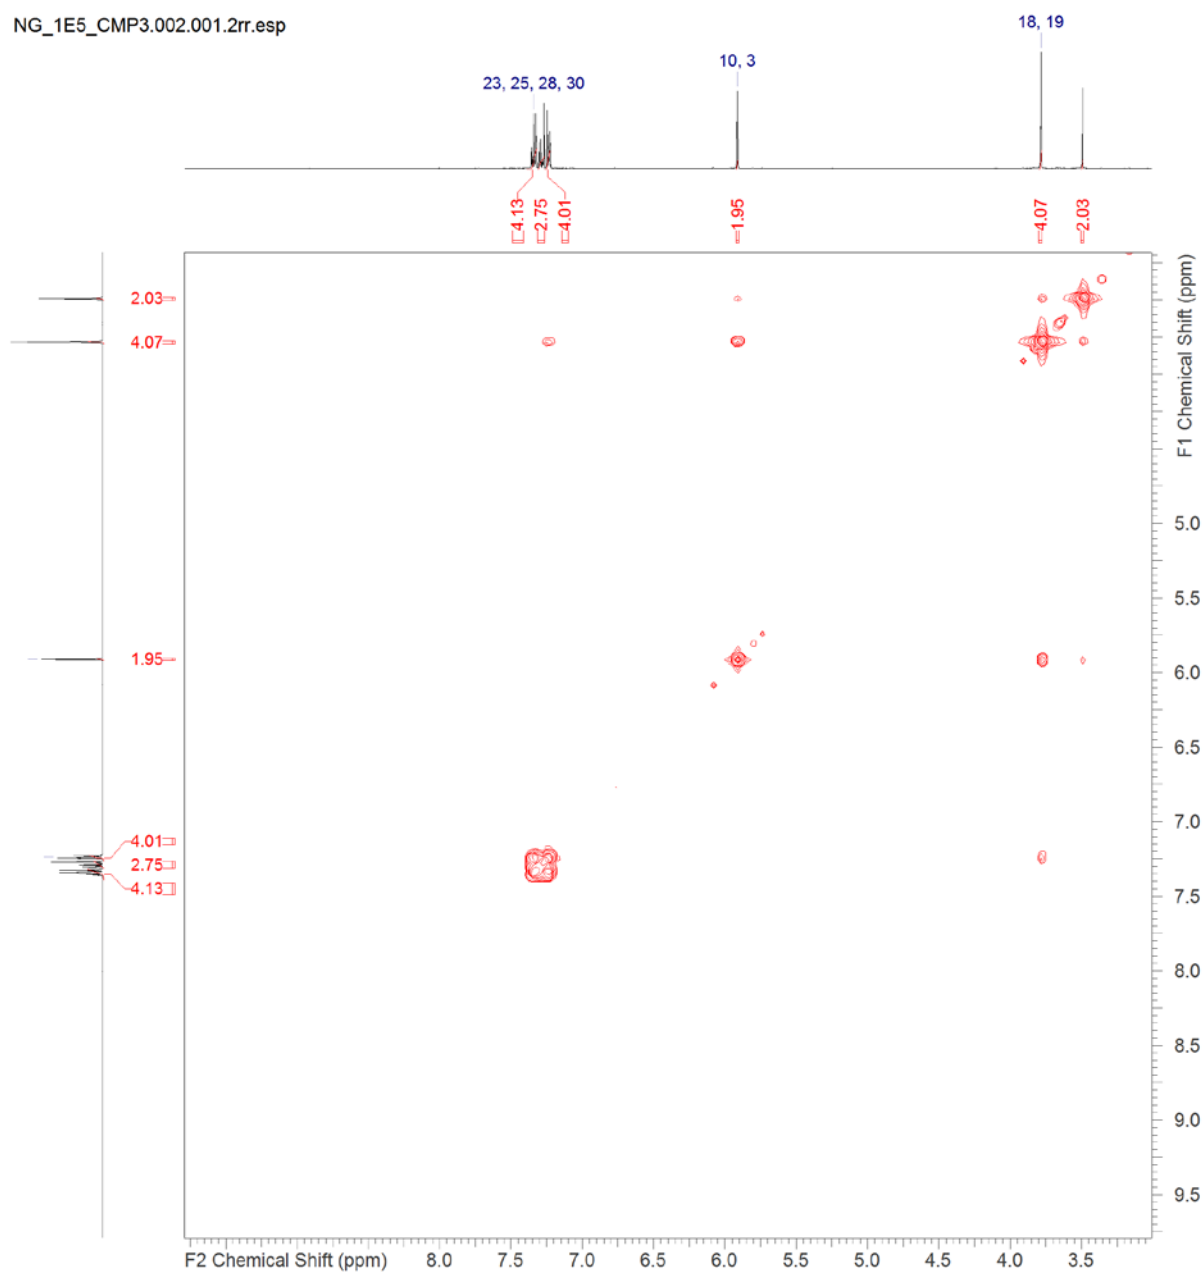

Figure S 57  $^1\text{H}$ - $^1\text{H}$ - COSY spectrum (500 MHz,  $\text{CDCl}_3$ ) of 1E5\_CMP1

NG\_1E5\_CMP3.003.001.2rr.esp

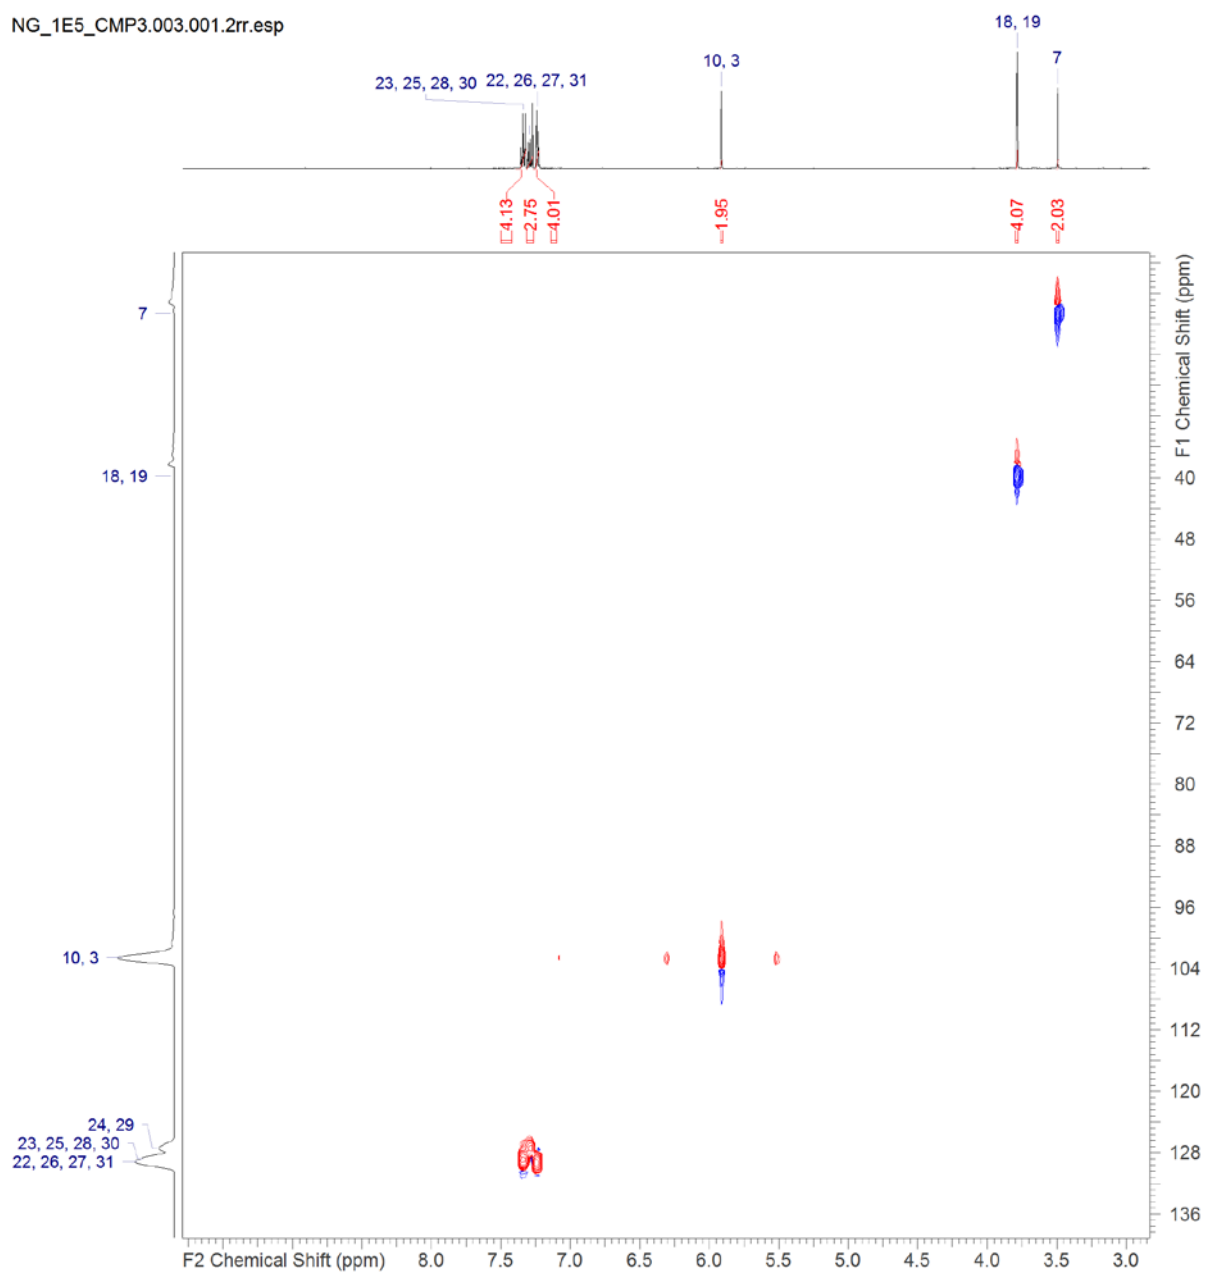

Figure S 58 HSQC-spectrum (500 MHz; 125 MHz,  $\text{CDCl}_3$ ) of 1E5\_CMP1



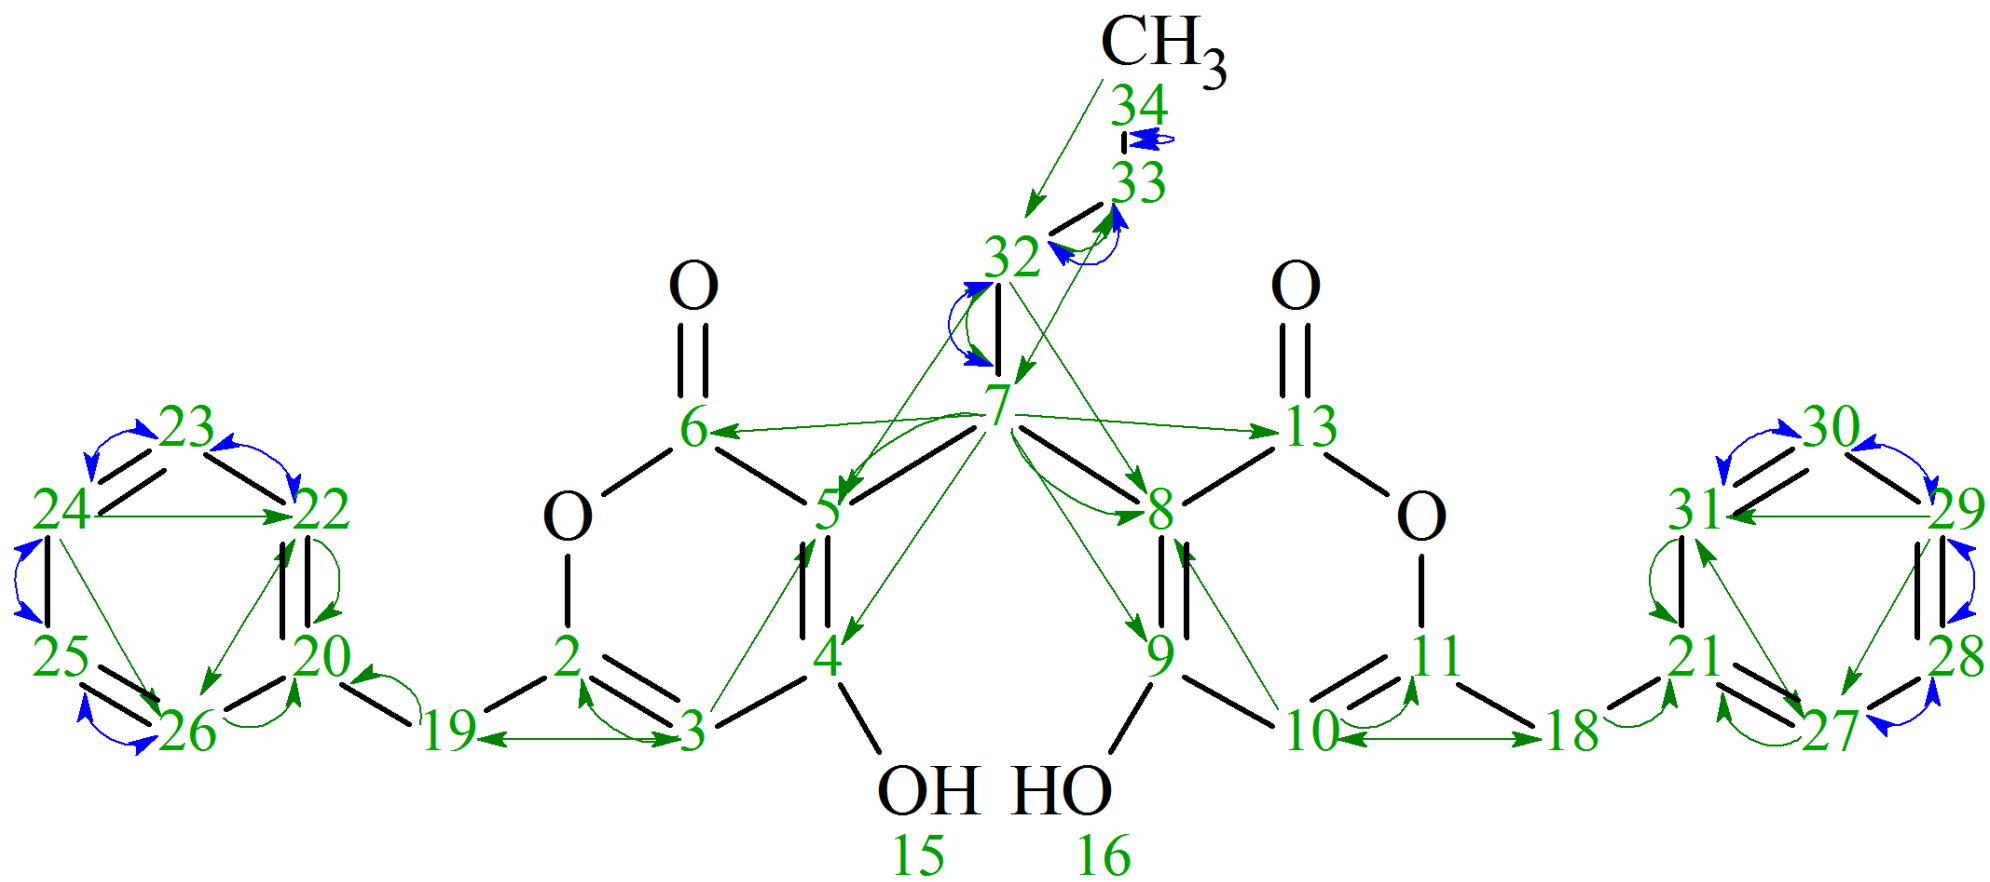

Figure S 59 Structure of 1E5\_CMP2 with all observed correlations (HMBC: green;  $^1\text{H}$ - $^1\text{H}$ -Cosy: blue)

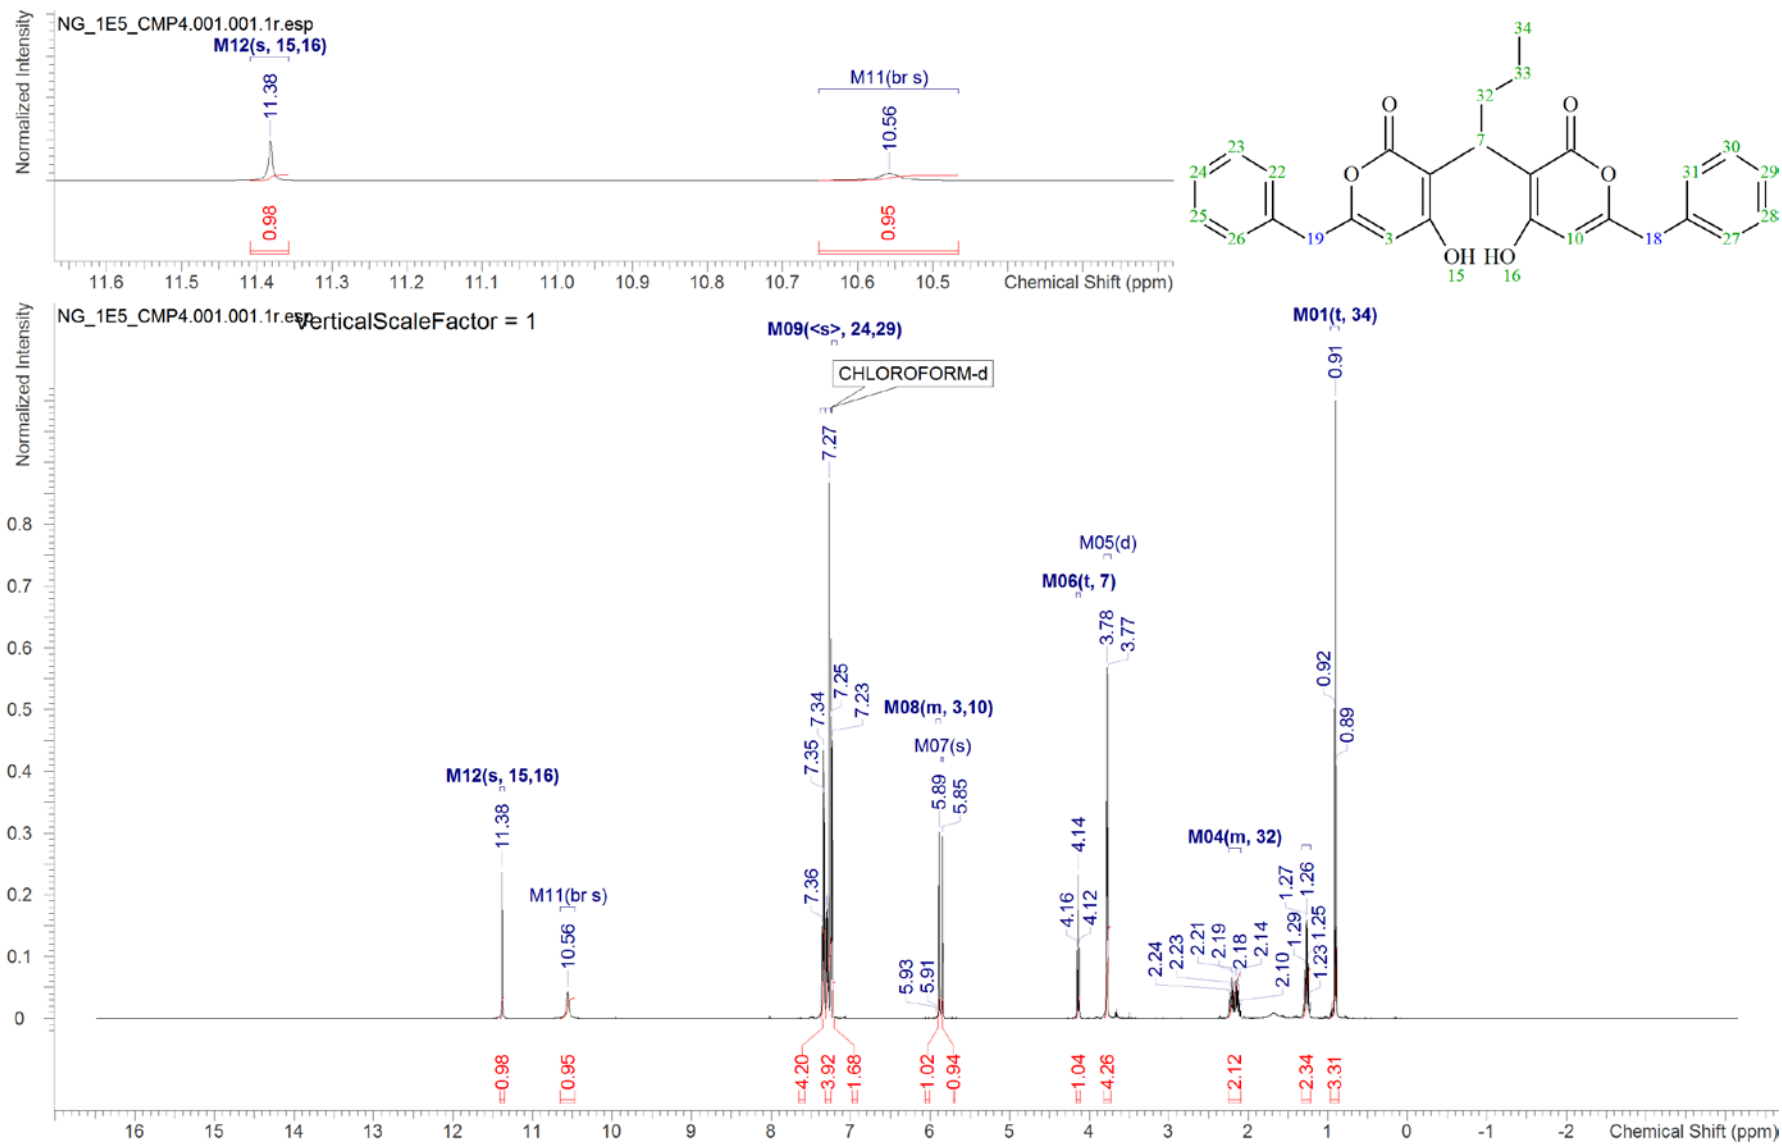

Figure S 60  $^1\text{H-NMR}$  spectrum (500 MHz,  $\text{CDCl}_3$ ) of 1E5\_CMP2; zoom from 11.6 to 9.5 ppm

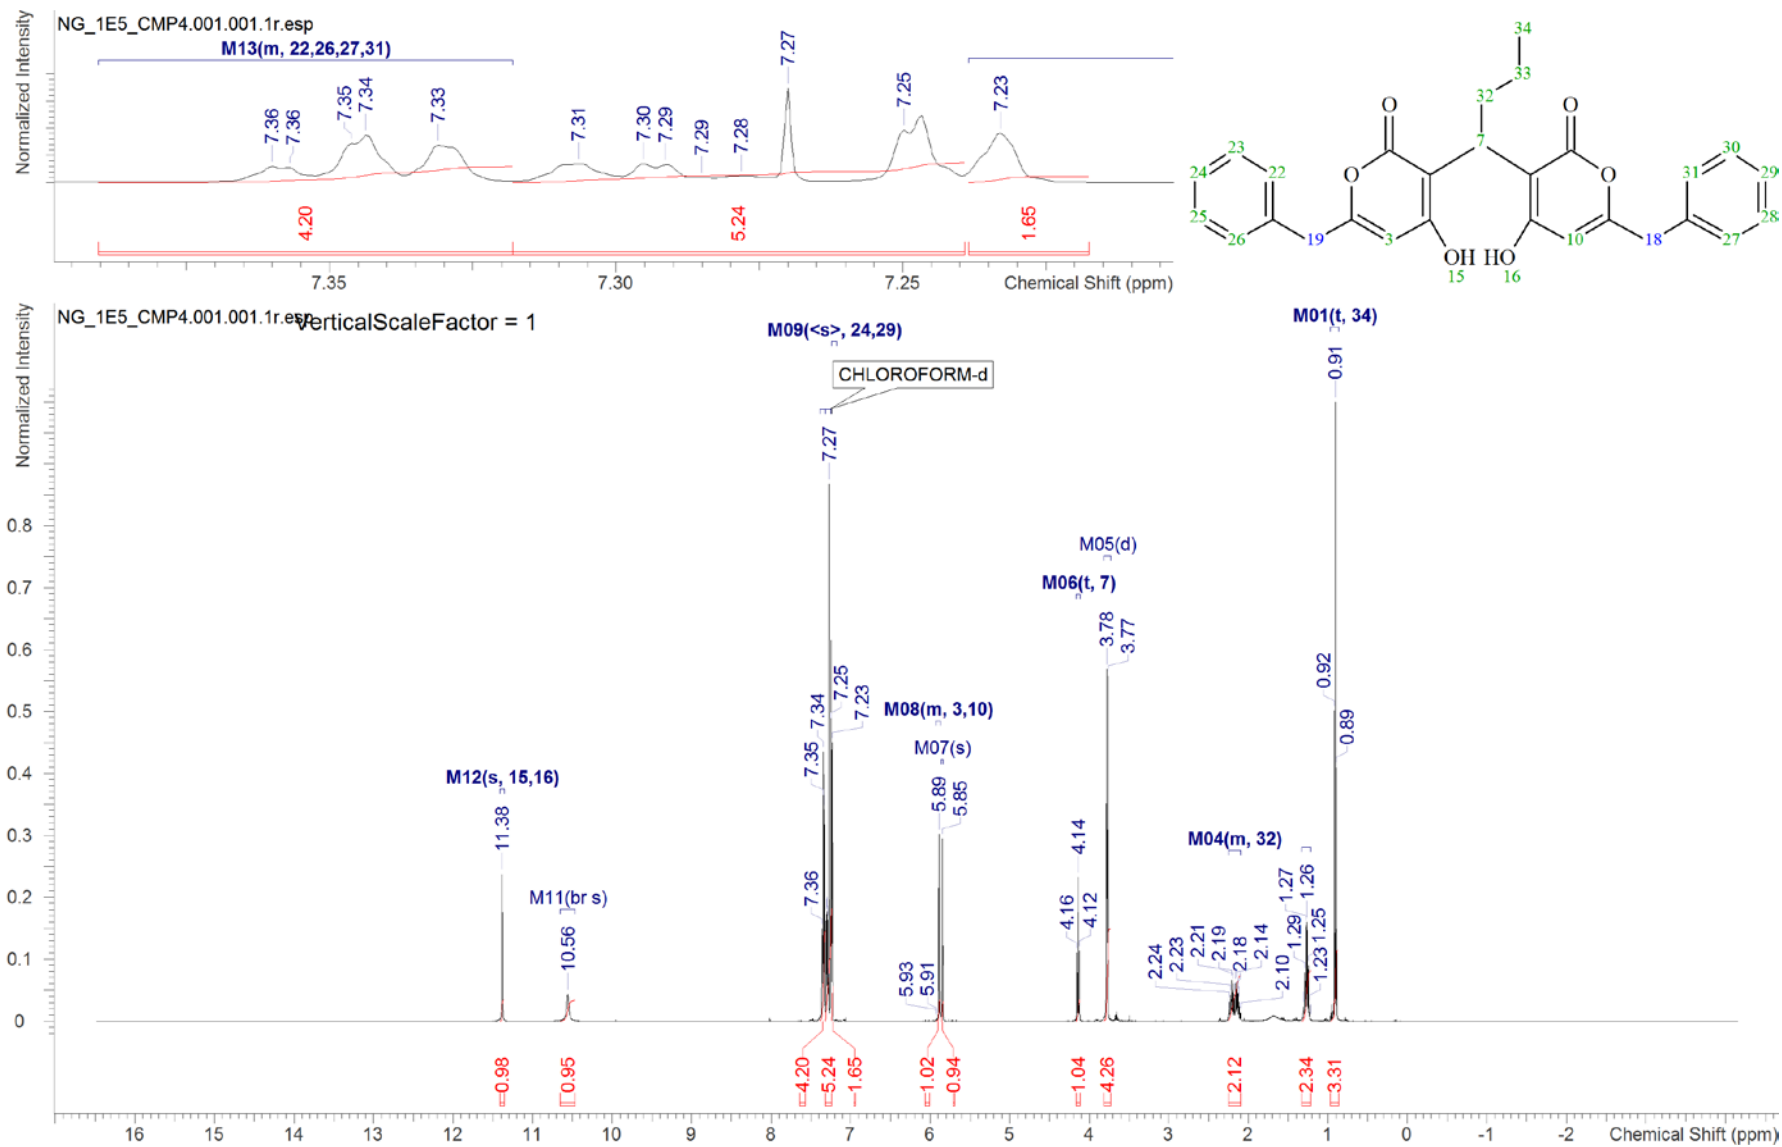

Figure S 61  $^1\text{H-NMR}$  spectrum (500 MHz,  $\text{CDCl}_3$ ) of 1E5\_CMP2; zoom from 7.4 to 7.2 ppm

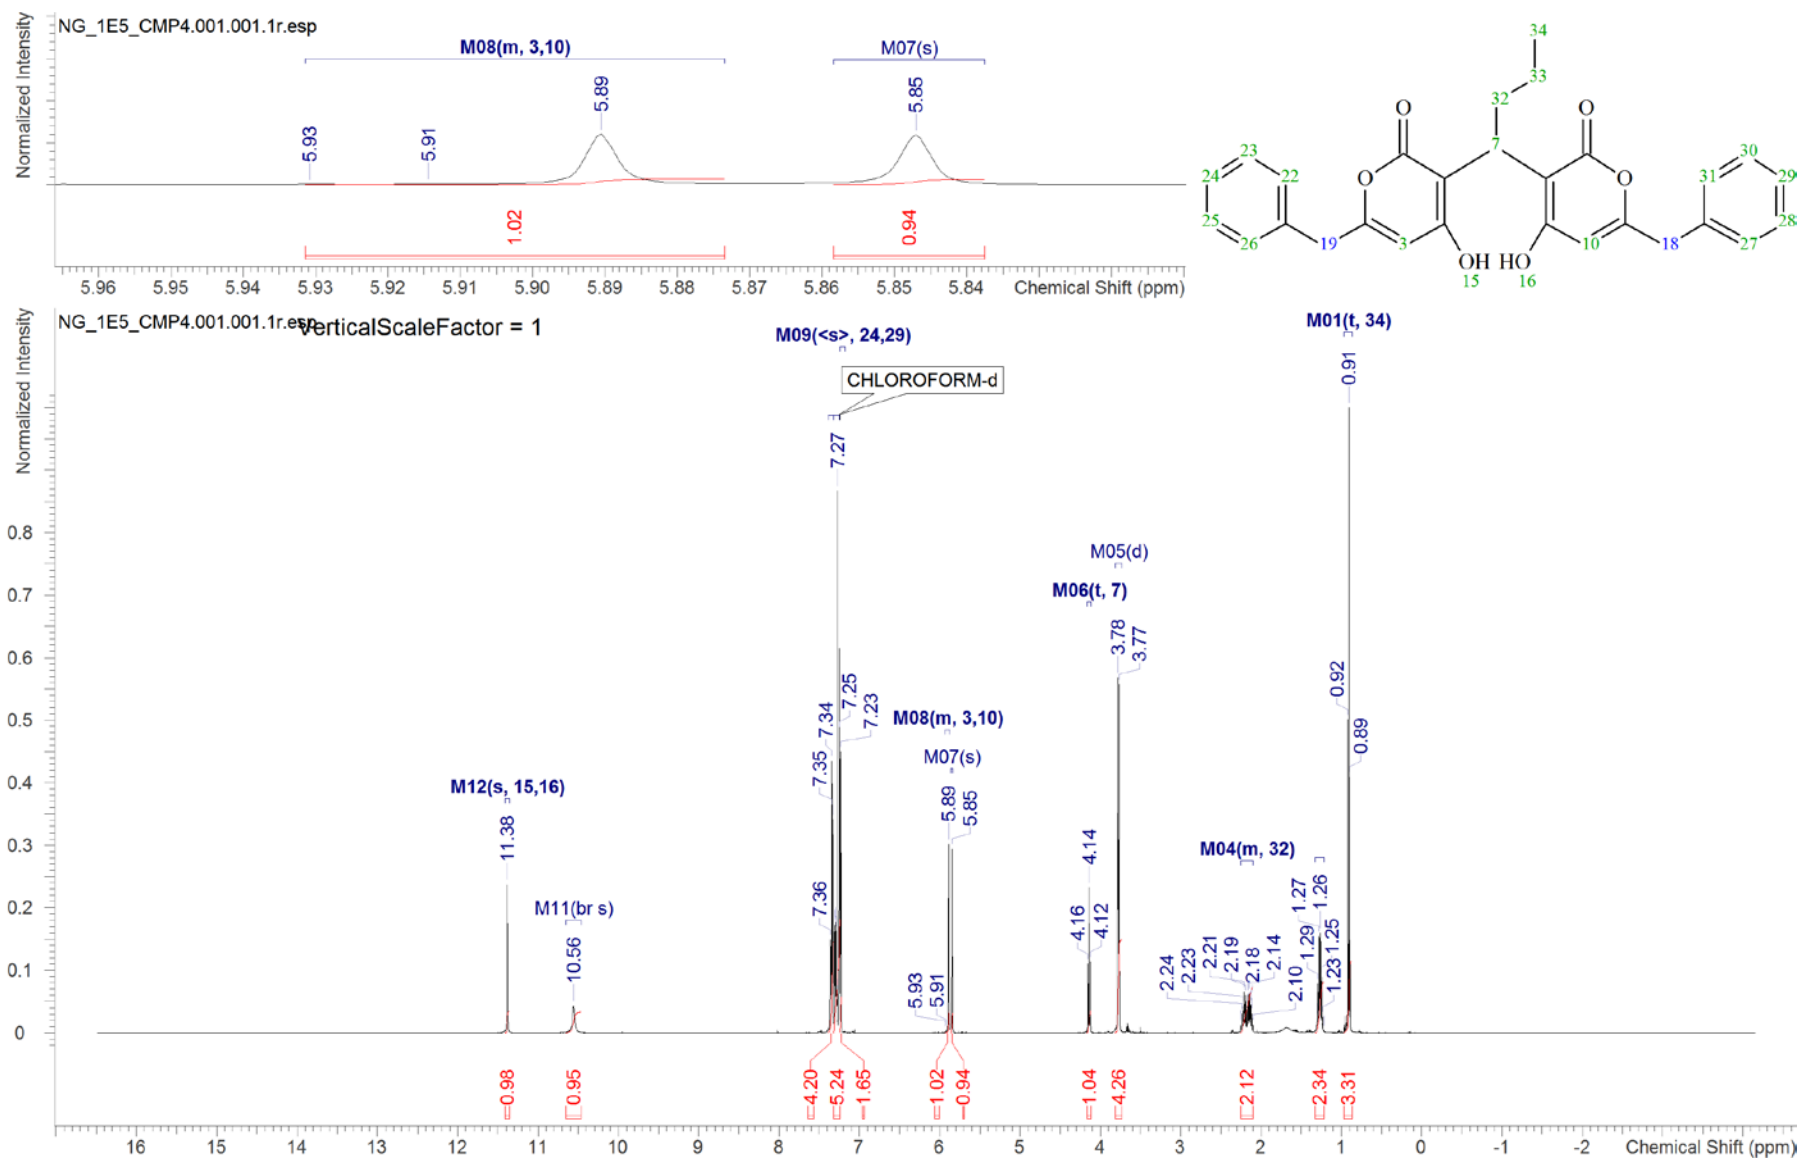

Figure S 62 <sup>1</sup>H-NMR spectrum (500 MHz, CDCl<sub>3</sub>) of 1E5\_CMP2; zoom from 5.96 to 5.8 ppm

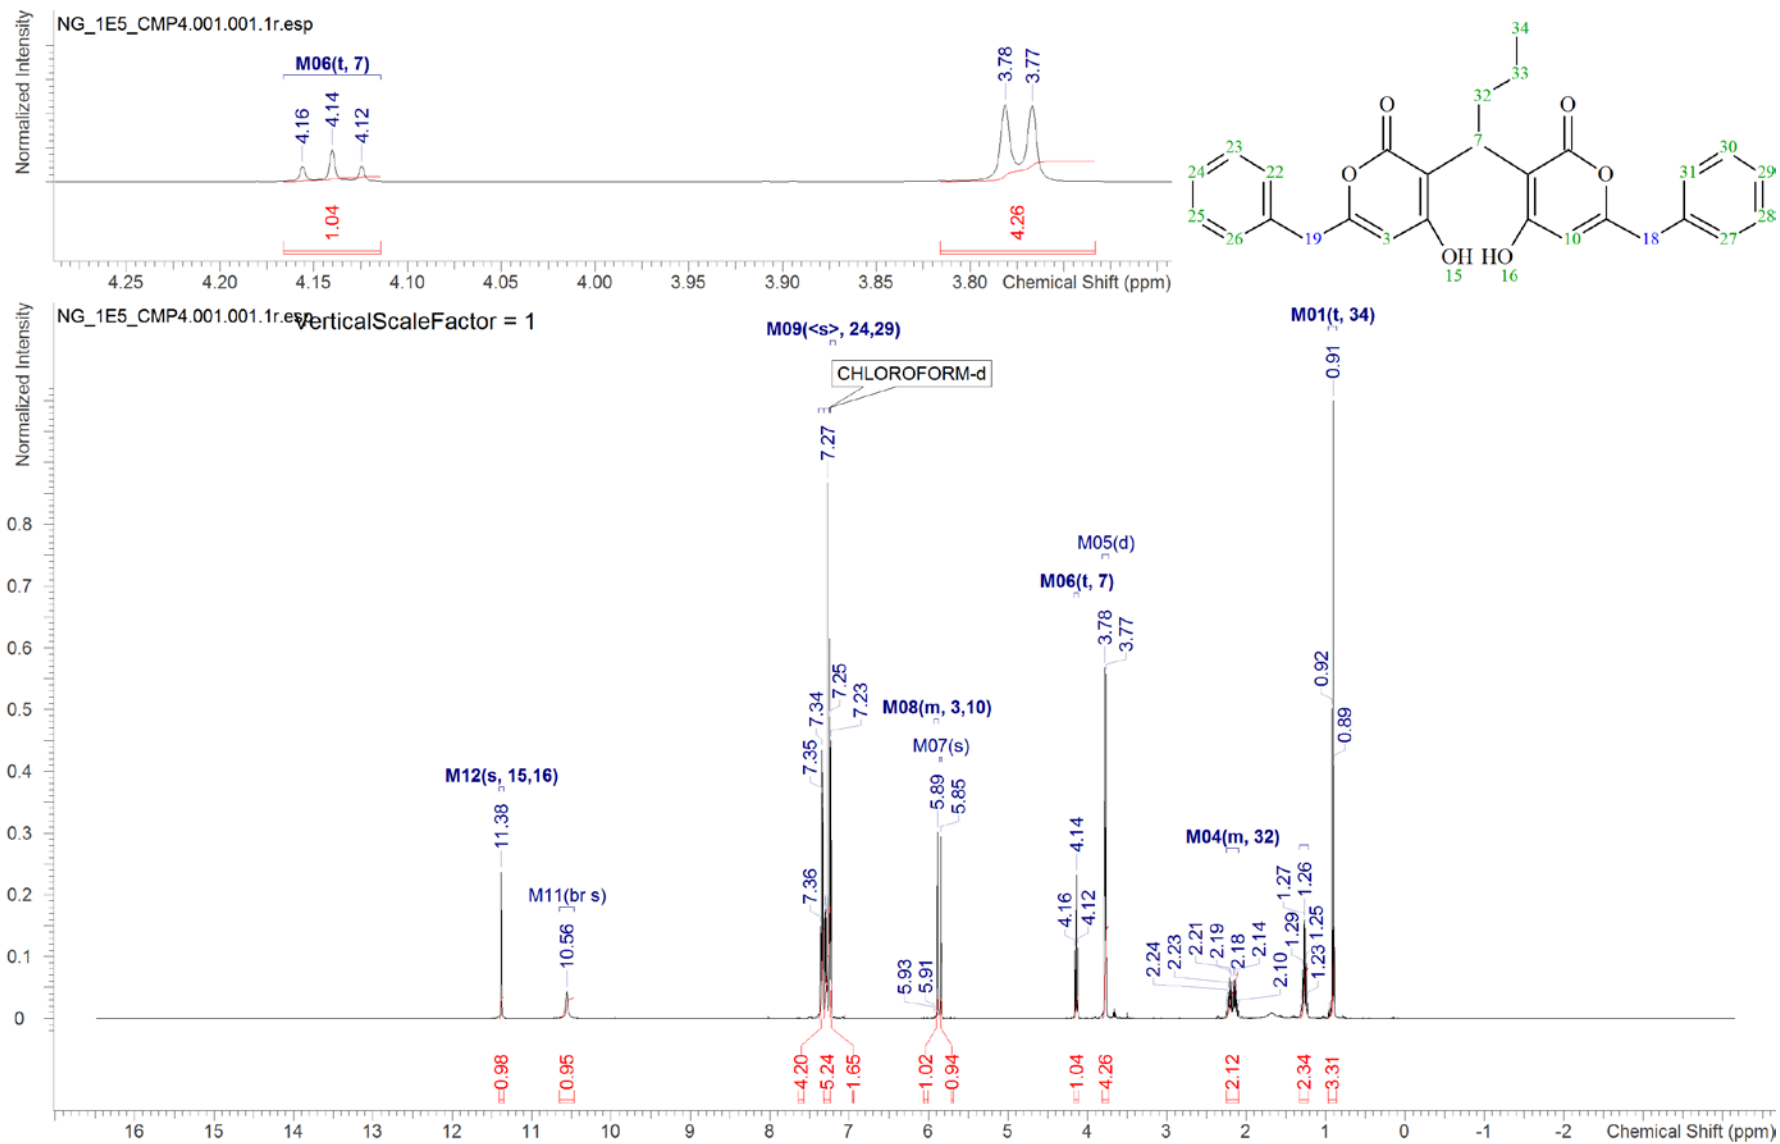

Figure S 63  $^1\text{H-NMR}$  spectrum (500 MHz,  $\text{CDCl}_3$ ) of 1E5\_CMP2; zoom from 4.25 to 3.75 ppm

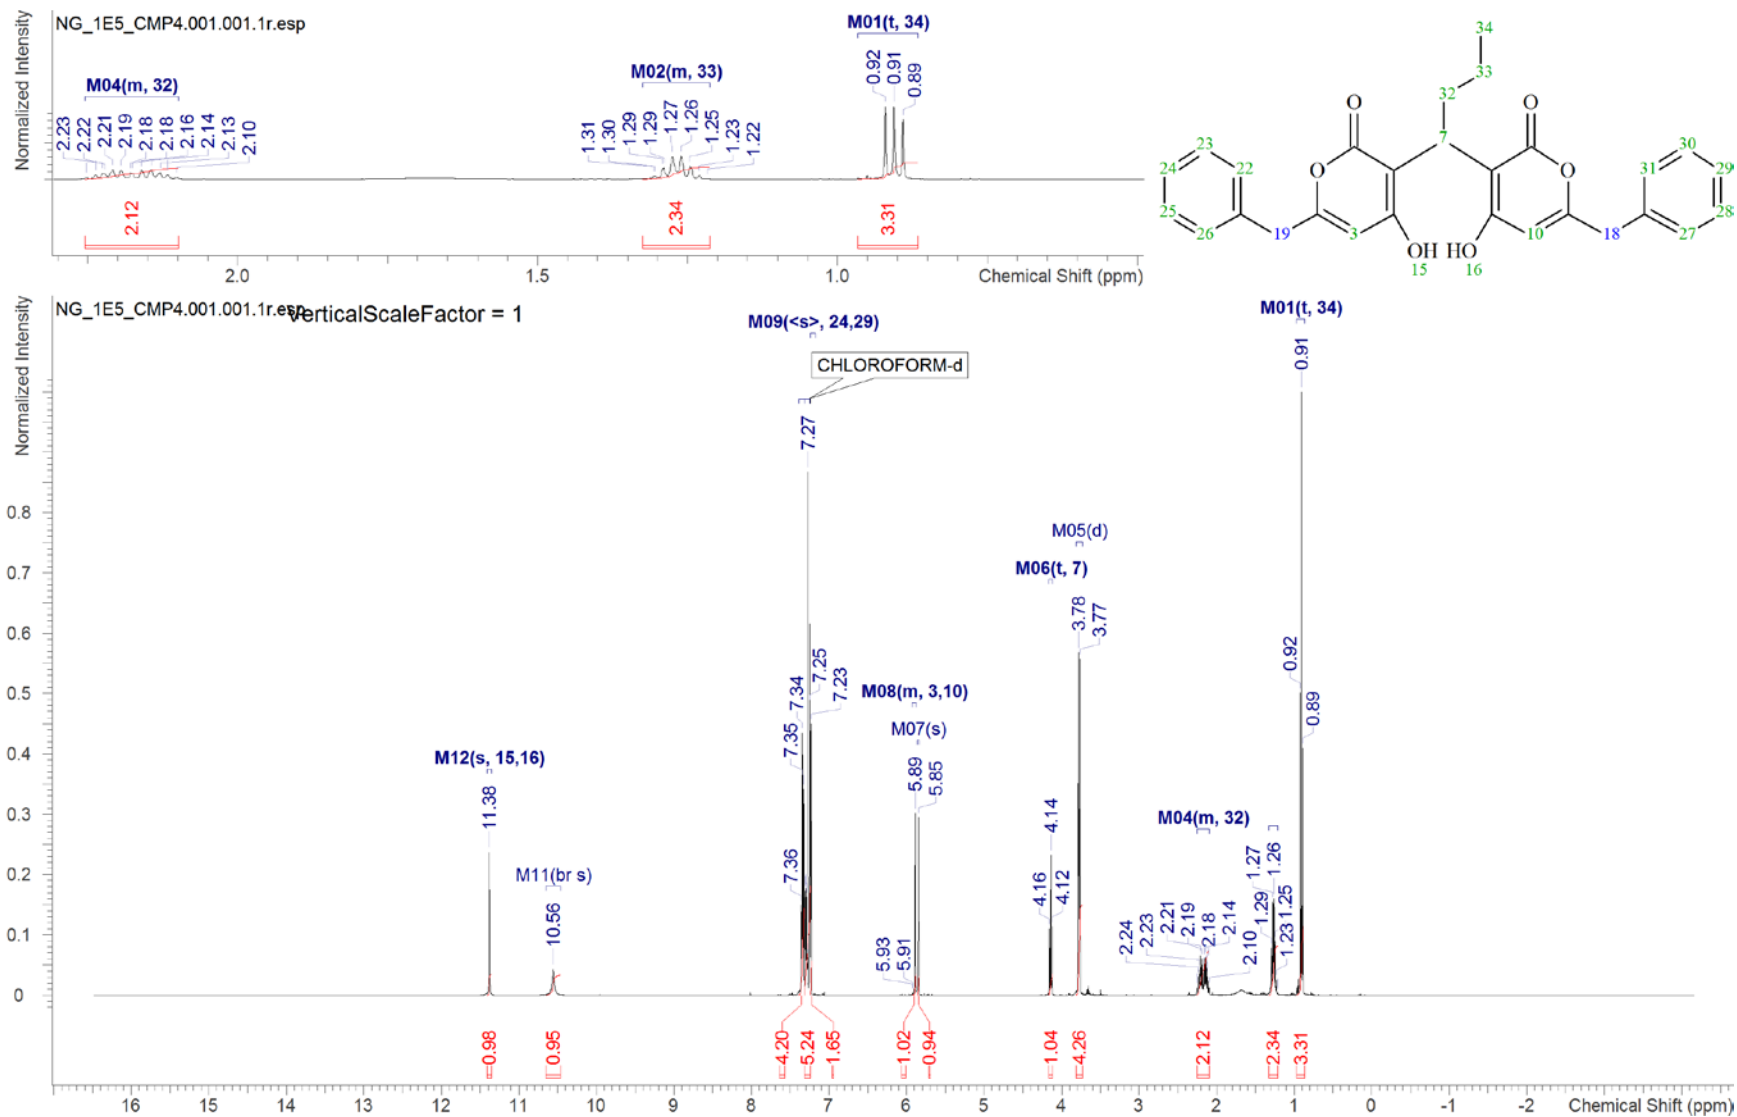

Figure S 64  $^1\text{H-NMR}$  spectrum (500 MHz,  $\text{CDCl}_3$ ) of 1E5\_CMP2; zoom from 2.5 to 0.5 ppm

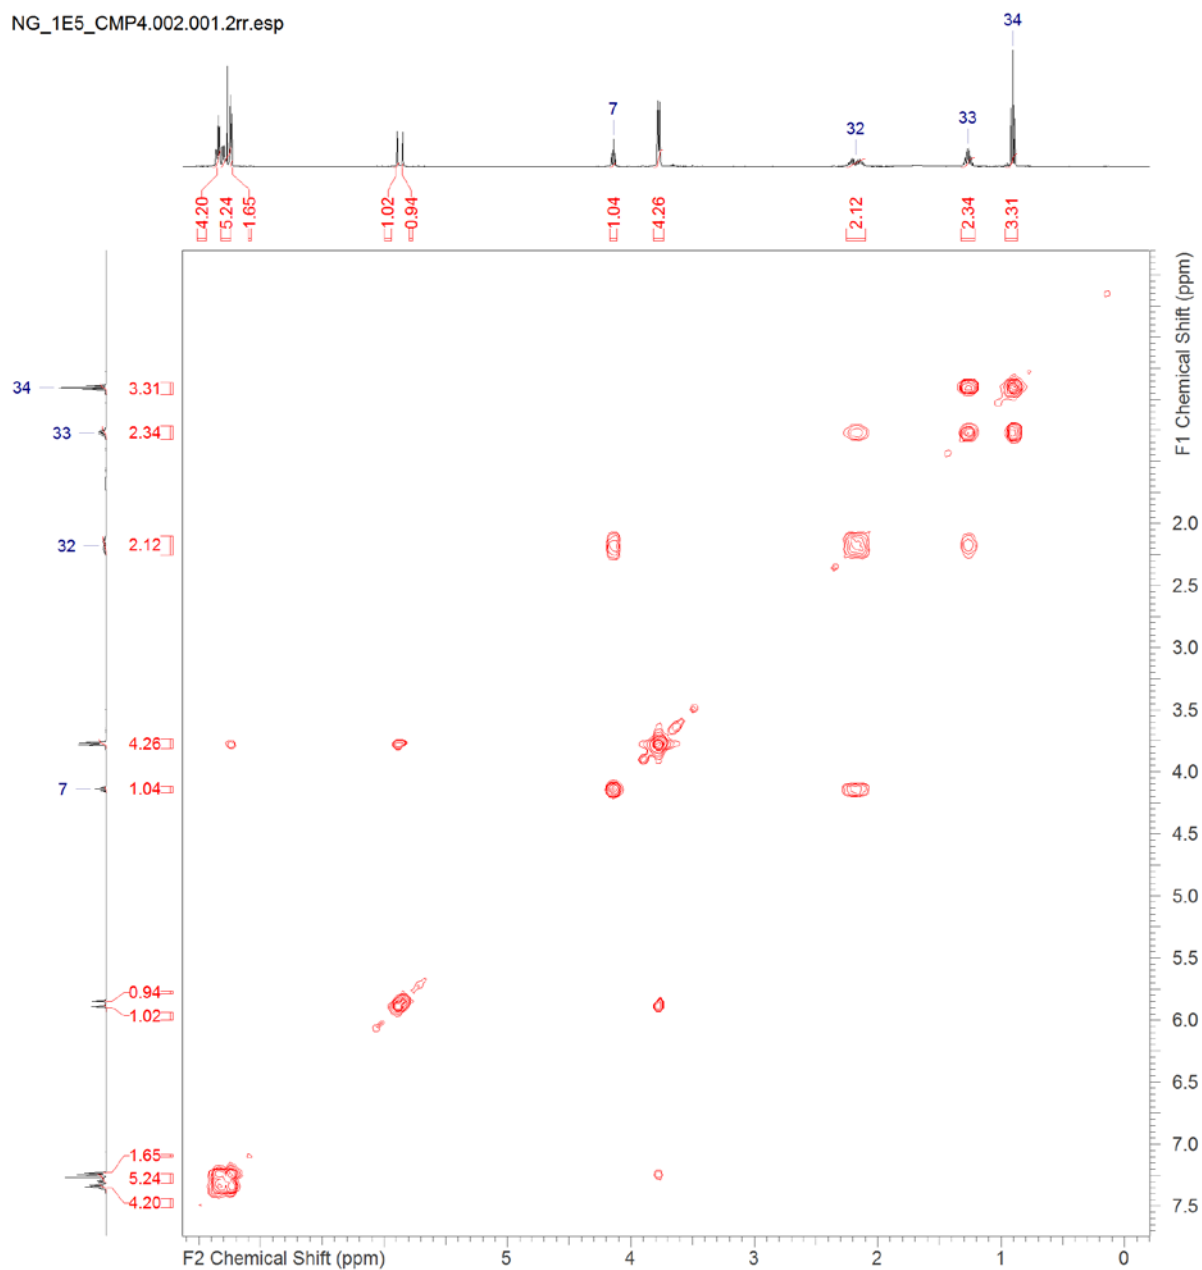

Figure S 65  $^1\text{H}$ - $^1\text{H}$ - COSY spectrum (500 MHz,  $\text{CDCl}_3$ ) of 1E5\_CMP2

NG\_1E5\_CMP4.003.001.2rr.esp

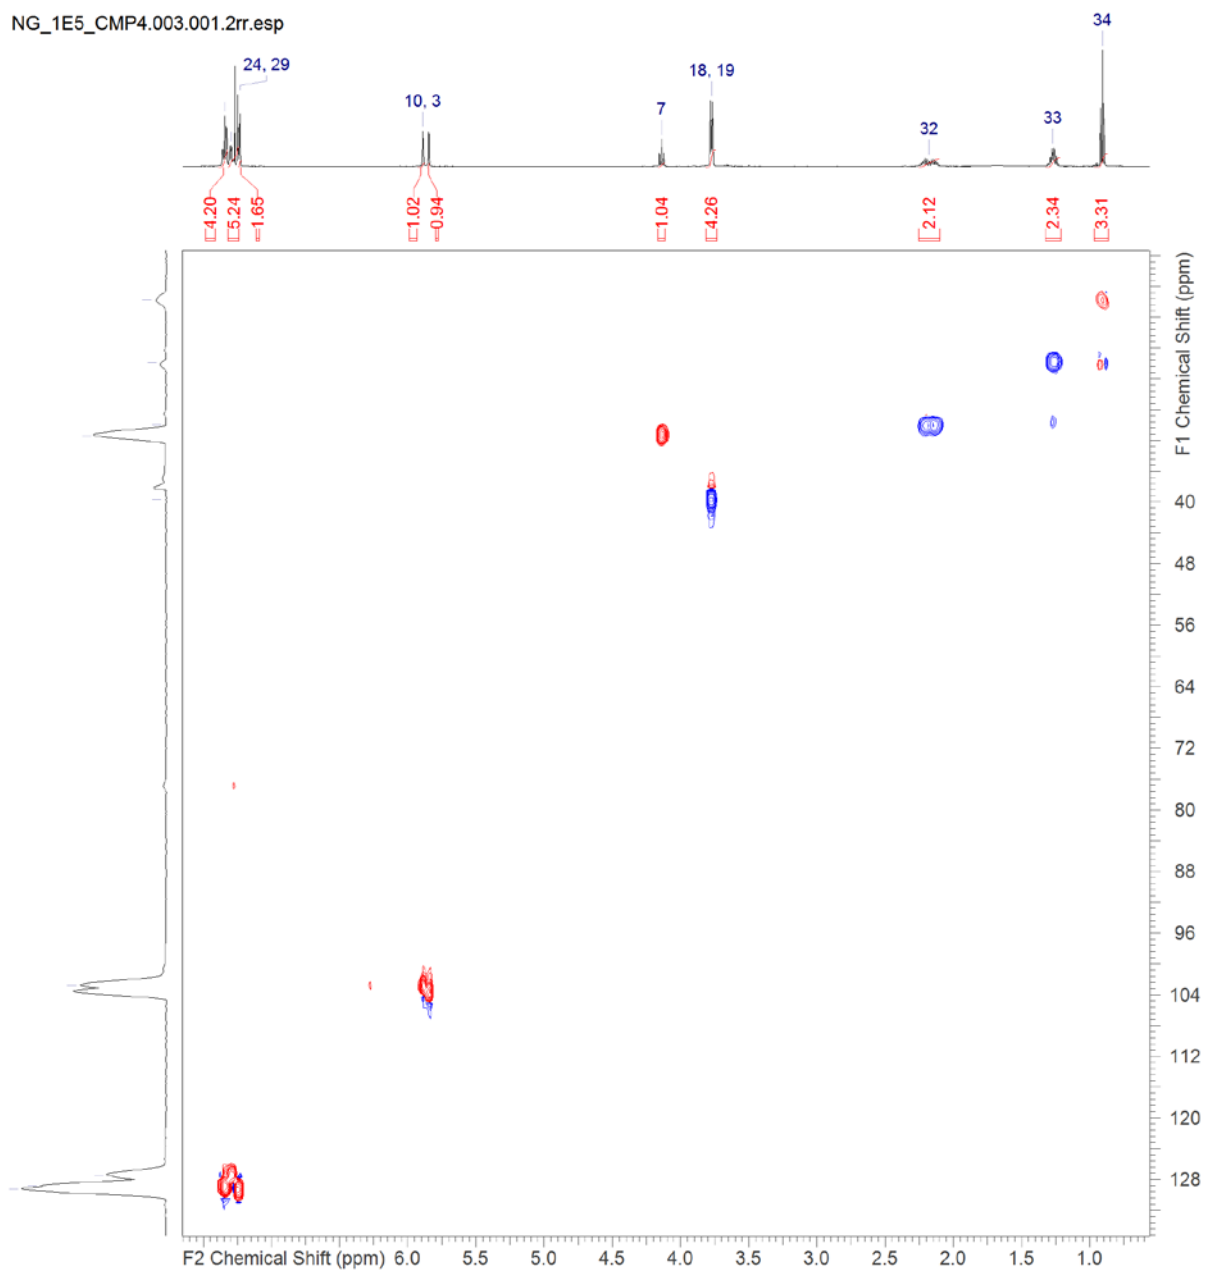

Figure S 66 HSQC-spectrum (500 MHz; 125 MHz, CDCL<sub>3</sub>) of 1E5\_CMP2



NG\_1E5\_CMP4.004.001.2rr.esp

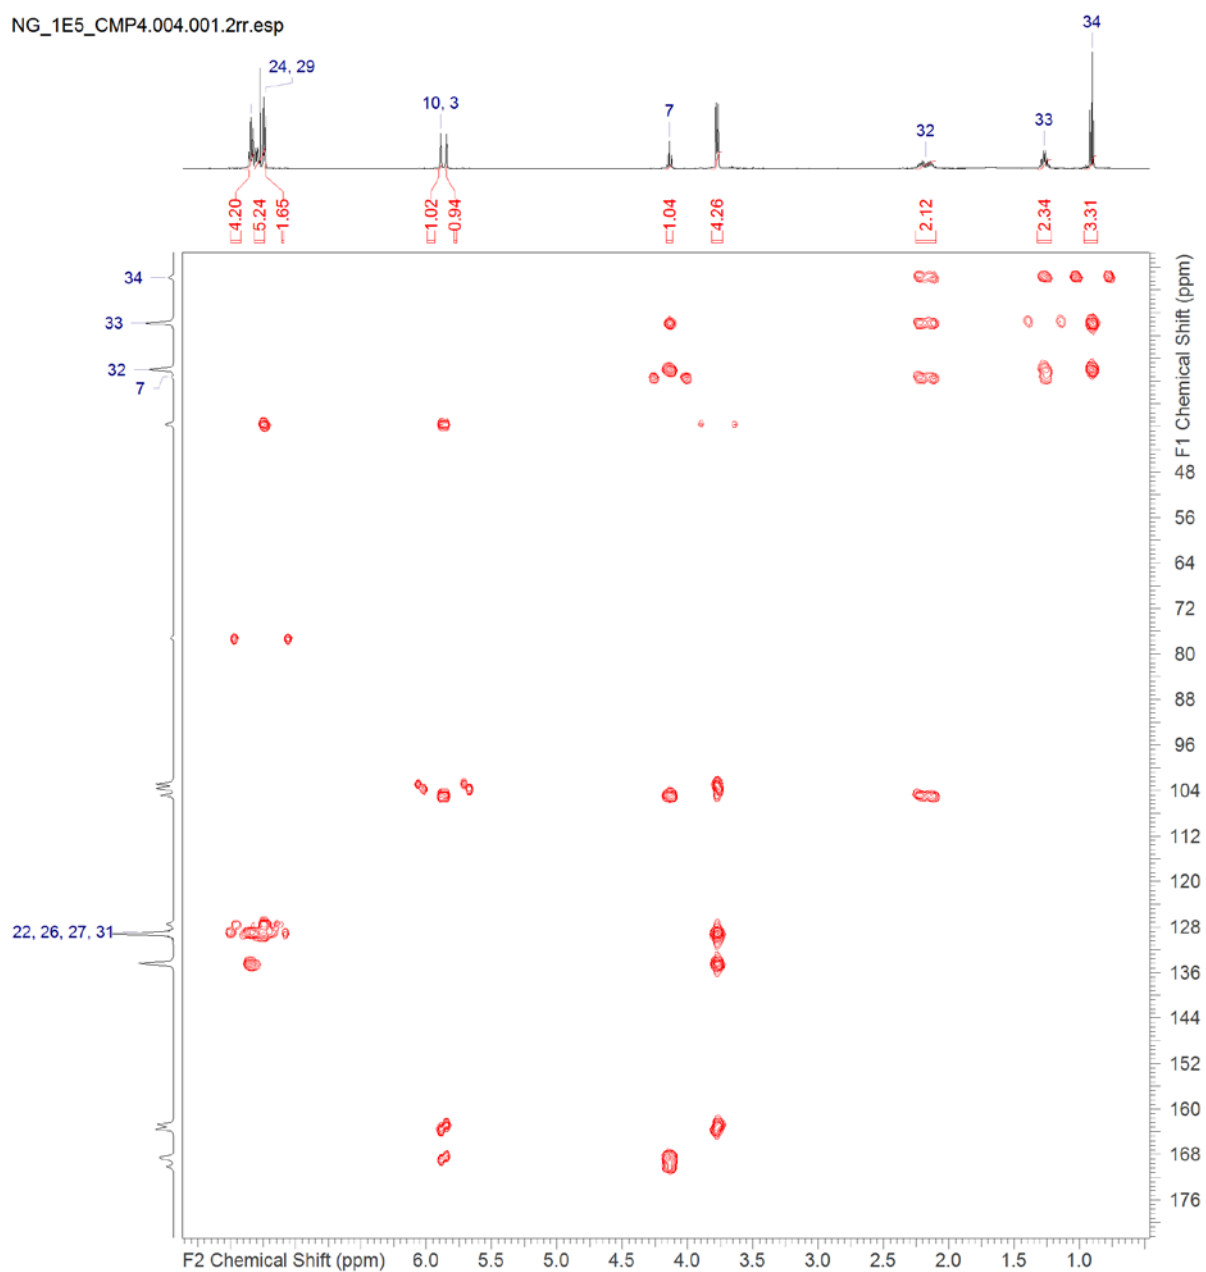

Figure S 67 HMBC-spectrum (500 MHz; 125 MHz, CDCL<sub>3</sub>) of 1E5\_CMP2

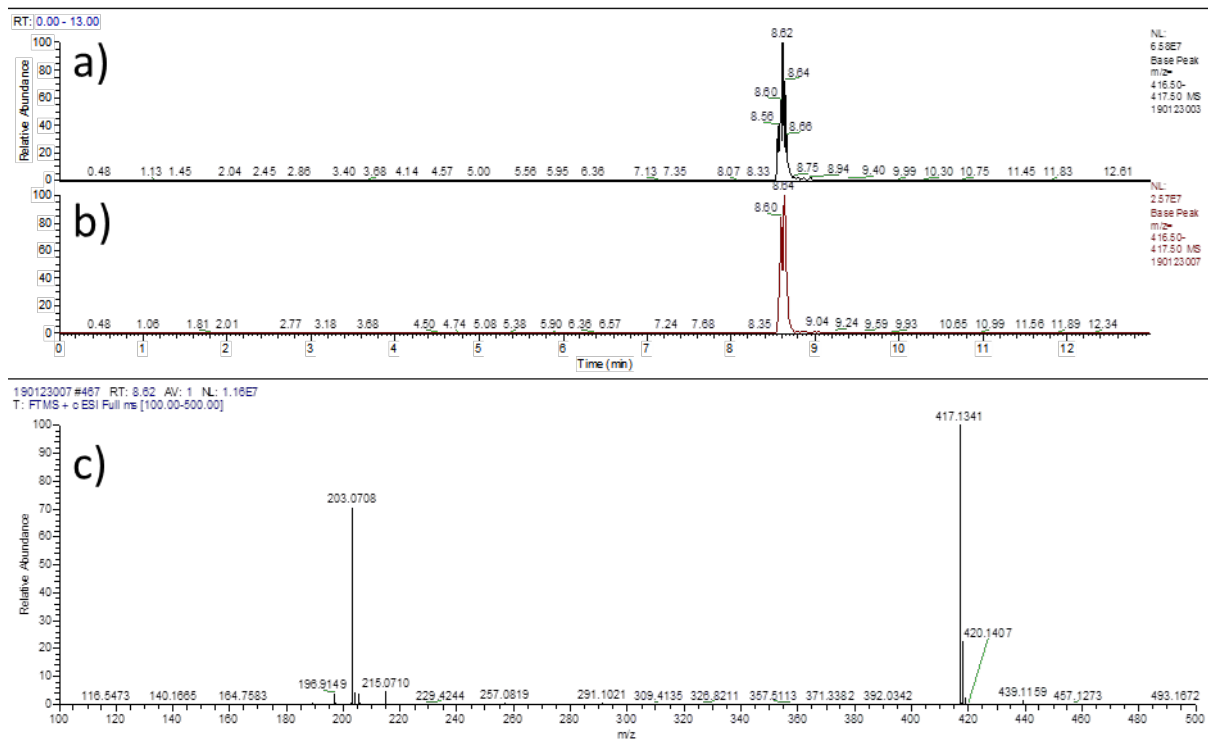

Figure S 68 HPLC-MS Extracted ion chromatogram (Extracted mass  $417 \pm 0.5$ ) of a) Spontaneously formed 8; b) synthesized 8; c) mass chromatogram of a)

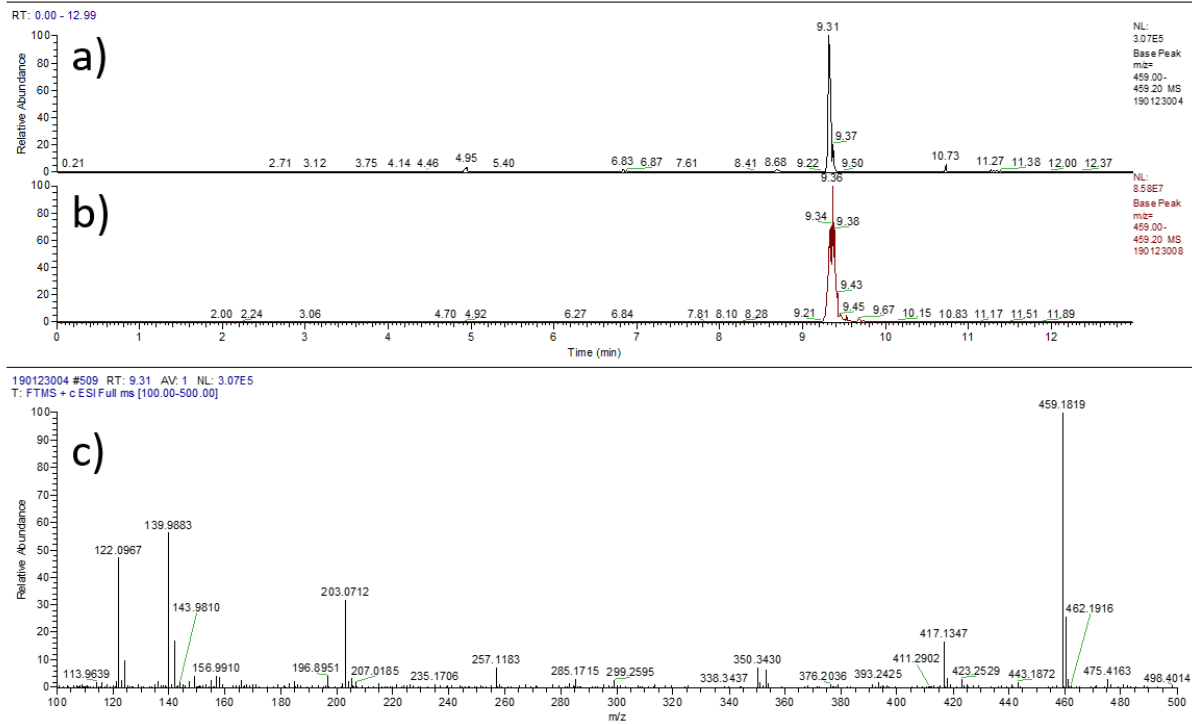

Figure S 69 HPLC-MS Extracted ion chromatogram (Extracted mass  $459.1 \pm 0.1$ ) of a) Spontaneously formed 9; b) synthesized 9; c) mass chromatogram of a)

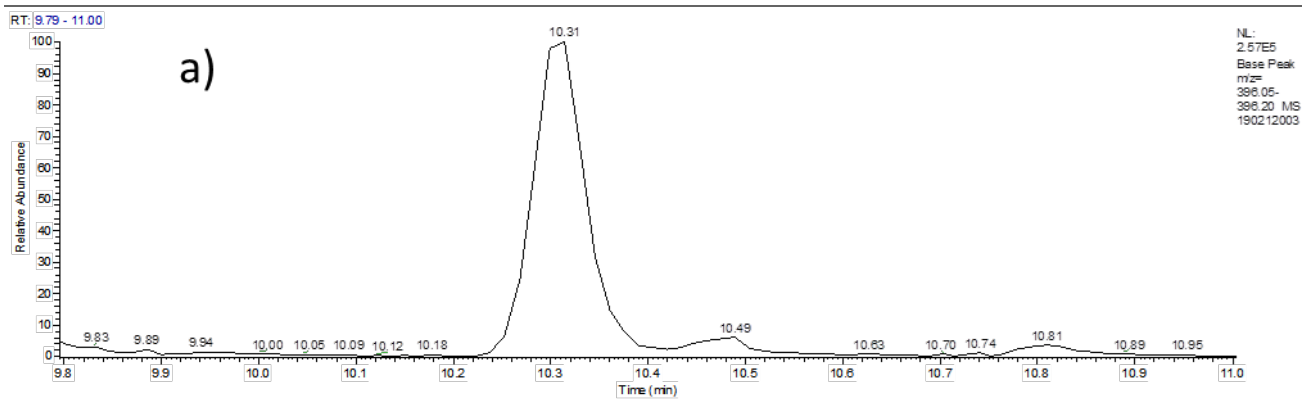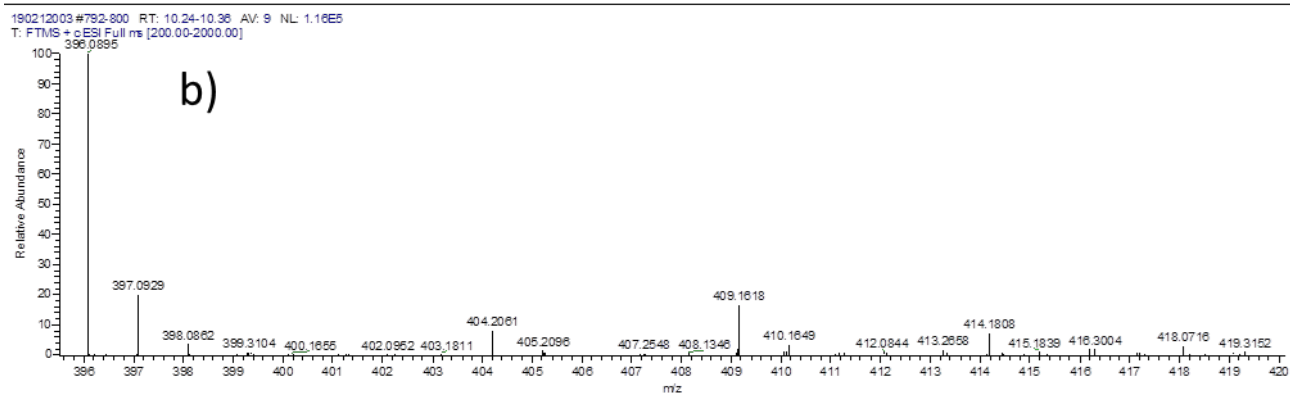

Figure S 70 HPLC Extracted ion chromatogram (Extracted mass 396.05-696.20) of *S. lividans*  $\Delta$ YA6 1E5 b) mass of SEK43

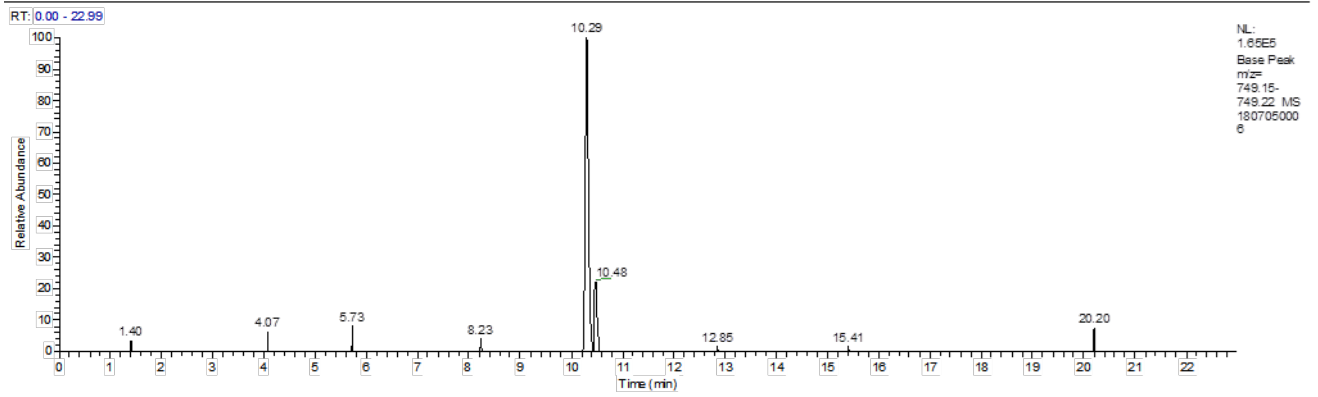

1807050006 #904-919 RT: 10.20-10.37 AV: 16 NL: 6.15E4  
T: FTMS + cESI Full ms [200.00-2000.00]

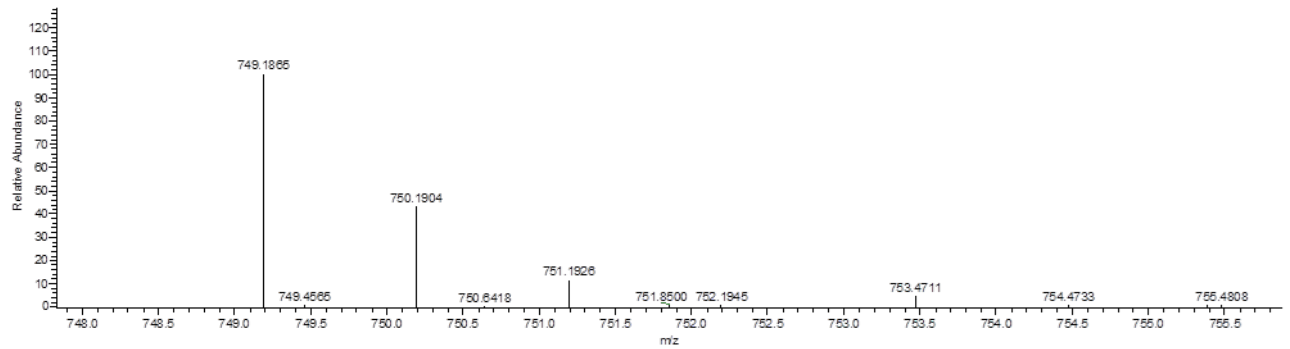

Figure S 71 HPLC Extracted ion chromatogram (Extracted mass 749.15-749.22) of *S. lividans*  $\Delta$ YA6 1E5 b) mass of SEK87

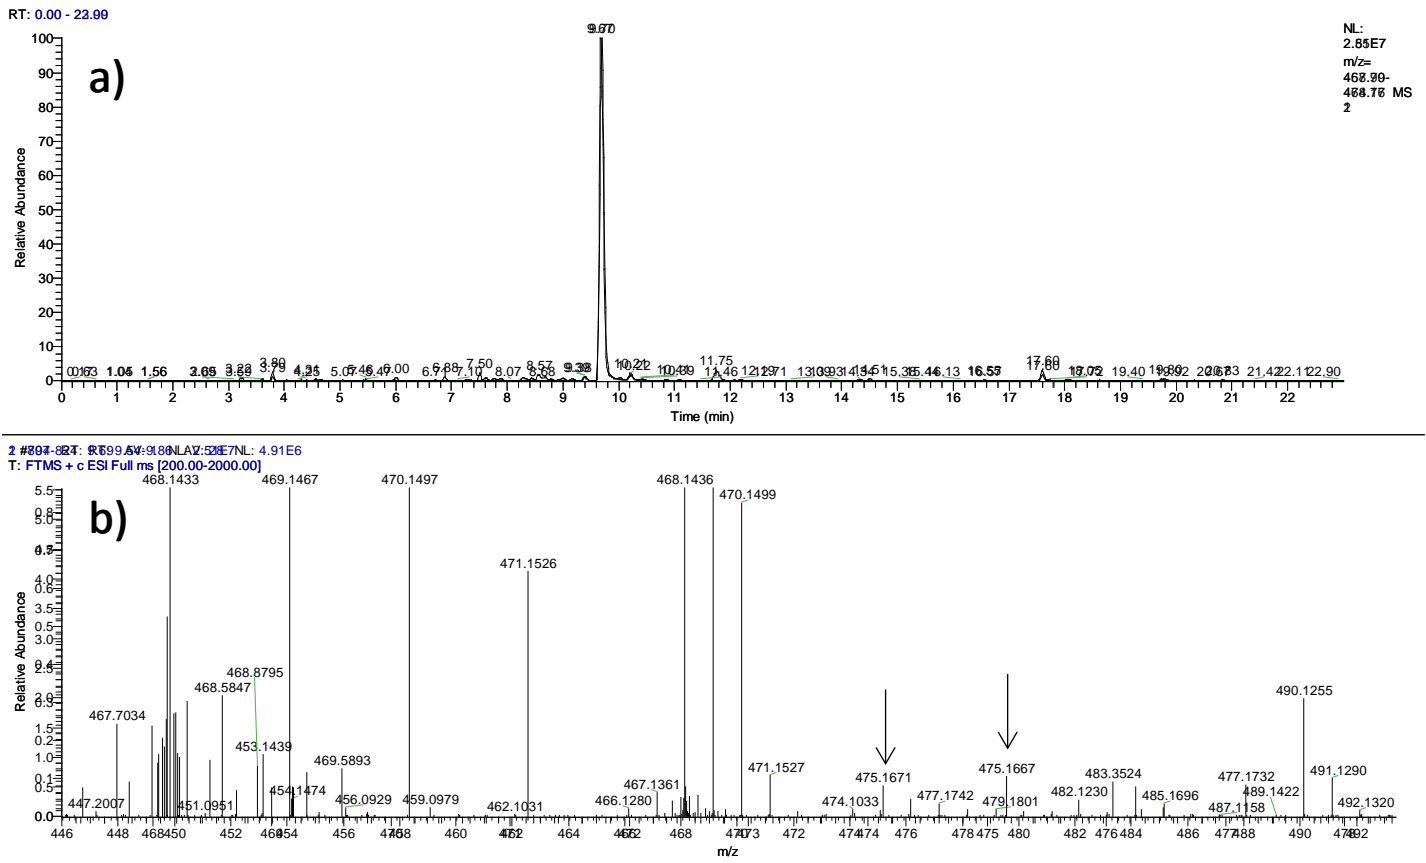

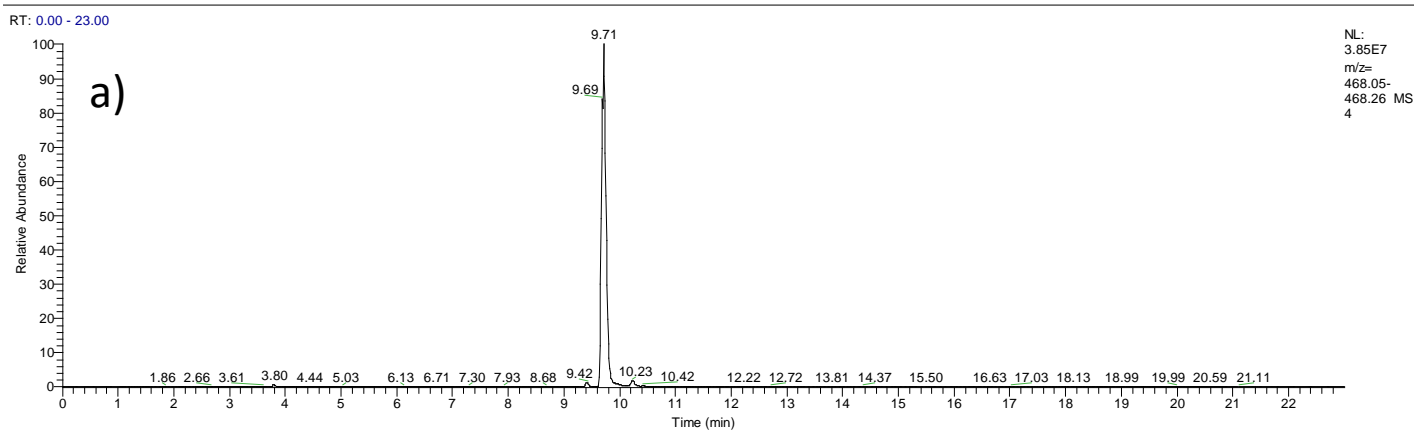

4 #814-828 RT: 9.65-9.80 AV: 15 NL: 2.08E7  
T: FTMS + c ESI Full ms [200.00-2000.00]

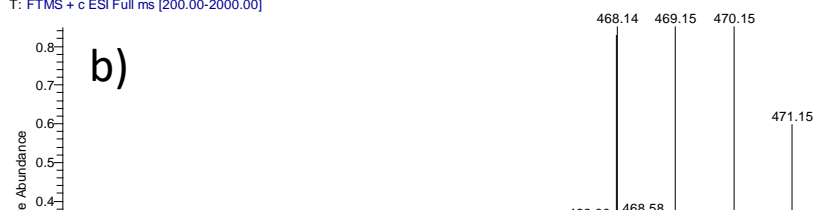

Figure S 73 HPLC-MS Extracted ion chromatogram (Extracted mass  $468 \pm 0.5$ ) of a) *S. lividans*  $\Delta$ YA6\_1E5 with  $^{13}\text{C}$ - $^{9,15}\text{N}$ -1-labelled L-tyrosine added to the medium b) MS-Chromatogram of a), incorporation of  $^{13}\text{C}$ - $^{9,15}\text{N}$ -1-labelled L-tyrosine visible; second repeat of a triplicate

459 460 461 462 463 464 465 466 467 468 469 470 471 472 473 474 475 476 477 478 479 480 481  
X:\orbitrap\Niis\2019-05-31\2 05/31/19 11:59:24

RT

Figure S 75 HPLC-MS Extracted ion chromatogram (Extracted mass  $468 \pm 0.5$ ) of a) *S. lividans*  $\Delta$ YA6\_1E5 without  $^{13}\text{C}$ - $^{9,15}\text{N}$ -1-labelled L-tyrosine added to the medium b) MS-Chromatogram of a) no incorporation of  $^{13}\text{C}$ - $^{9,15}\text{N}$ -1-labelled L-tyrosine visible; first repeat of a triplicate

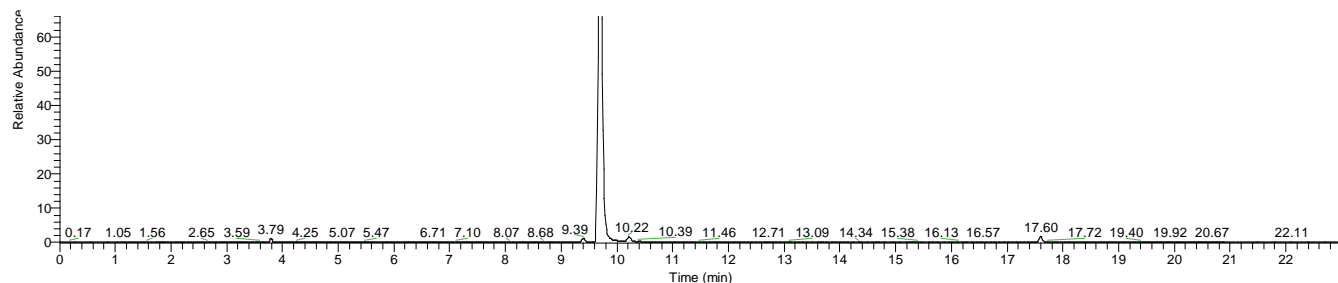

2 #804 RT: 9.69 AV: 1 NL: 2.51E7  
T: FTMS + c ESI Full ms [200.00-2000.00]

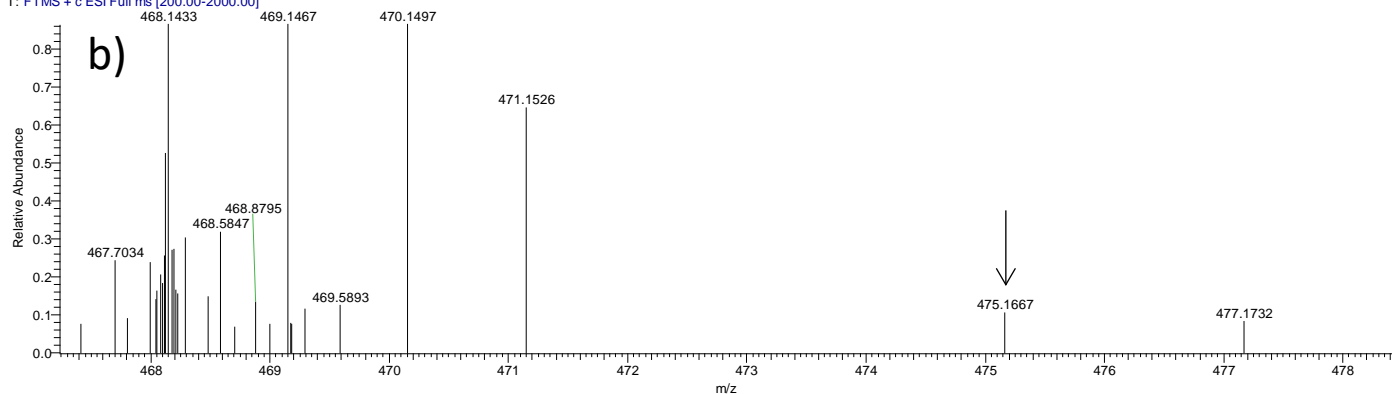

Figure S 74 HPLC-MS Extracted ion chromatogram (Extracted mass  $468 \pm 0.5$ ) of a) *S. lividans*  $\Delta$ YA6\_1E5 with  $^{13}\text{C}$ - $^{9,15}\text{N}$ -1-labelled L-tyrosine added to the medium b) MS-Chromatogram of a), incorporation of  $^{13}\text{C}$ - $^{9,15}\text{N}$ -1-labelled L-tyrosine visible; Third repeat of a triplicate

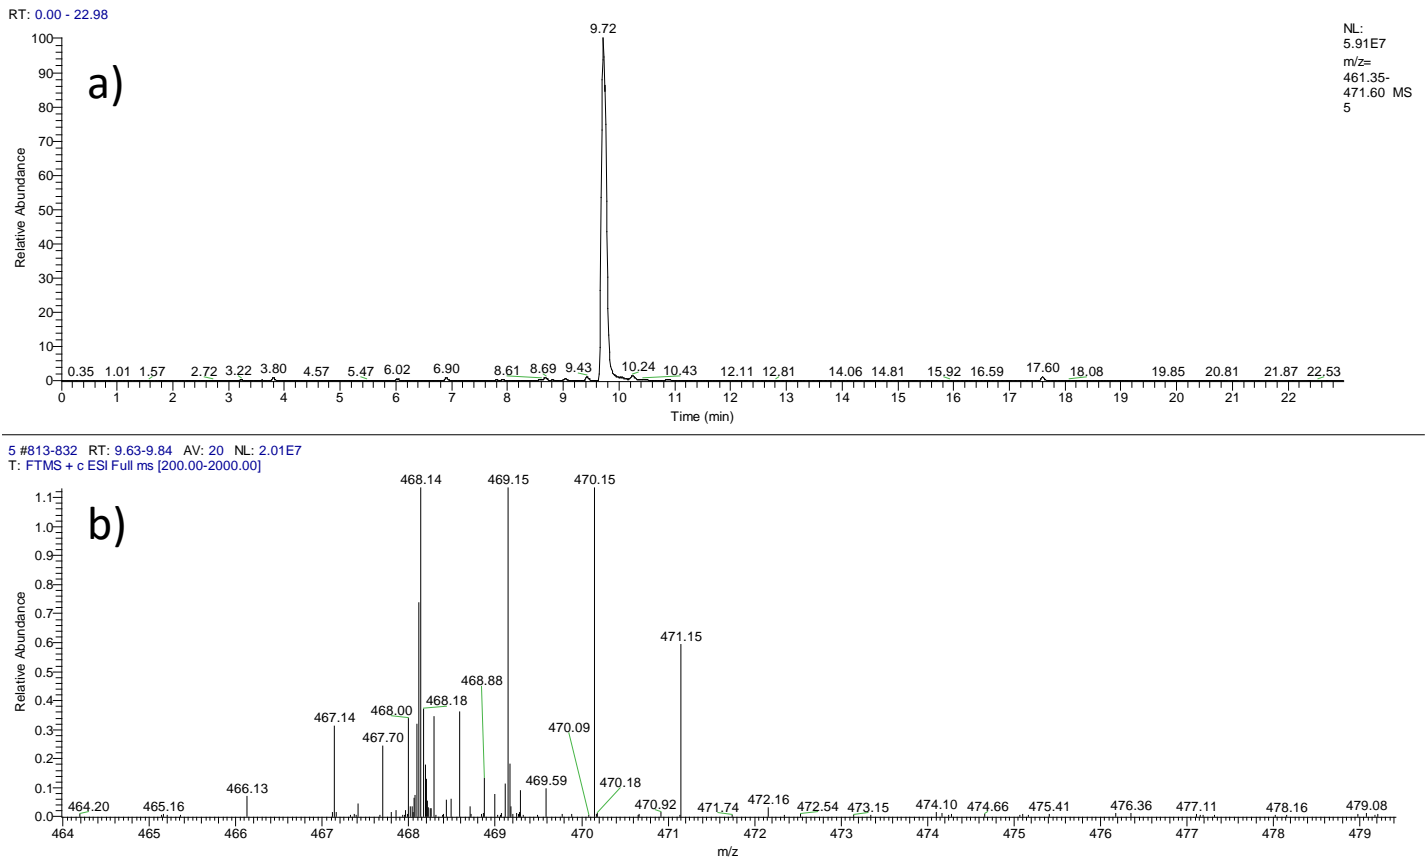

Figure S 76 HPLC-MS Extracted ion chromatogram (Extracted mass  $468 \pm 0.5$ ) of a) *S. lividans*  $\Delta$ YA6\_1E5 without  $^{13}\text{C}$ - $^{9,15}\text{N}$ -1-labelled L-tyrosine added to the medium b) MS-Chromatogram of a) no incorporation of  $^{13}\text{C}$ - $^{9,15}\text{N}$ -1-labelled L-tyrosine visible; second repeat of a triplicate





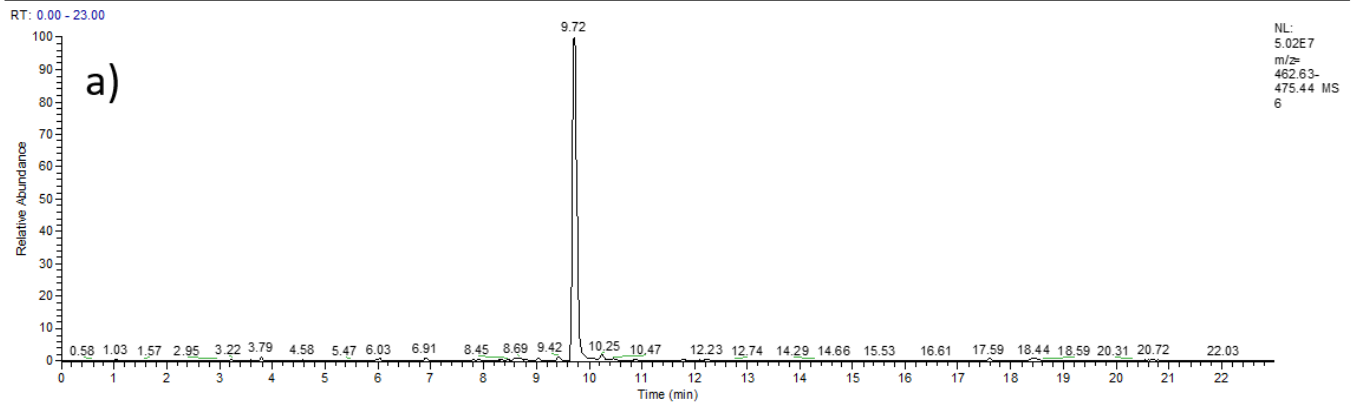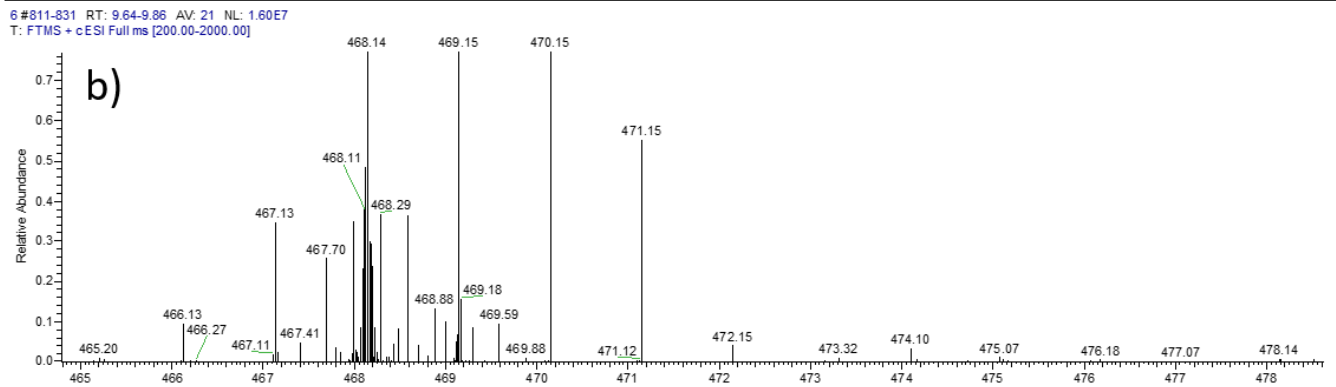

Figure S 77 HPLC-MS Extracted ion chromatogram (Extracted mass  $468 \pm 0.5$ ) of a) *S. lividans*  $\Delta$ YA6\_1E5 without  $^{13}\text{C}$ - $^{9-15}\text{N}$ -1-labelled L-tyrosine added to the medium b) MS-Chromatogram of a) no incorporation of  $^{13}\text{C}$ - $^{9-15}\text{N}$ -1-labelled L-tyrosine visible; third repeat of a triplicate

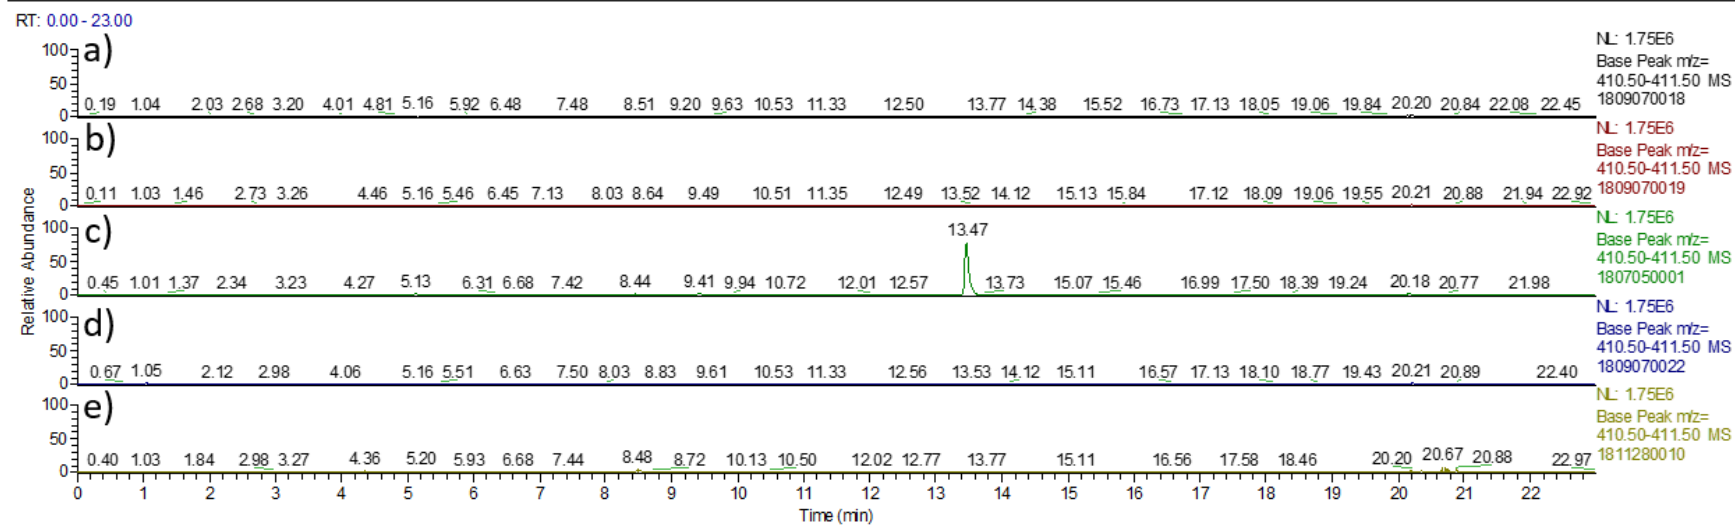

1807050001#1135 RT: 13.46 AV: 1 NL: 1.37E6  
T: FTMS + c ESI Full ms [200.00-2000.00]

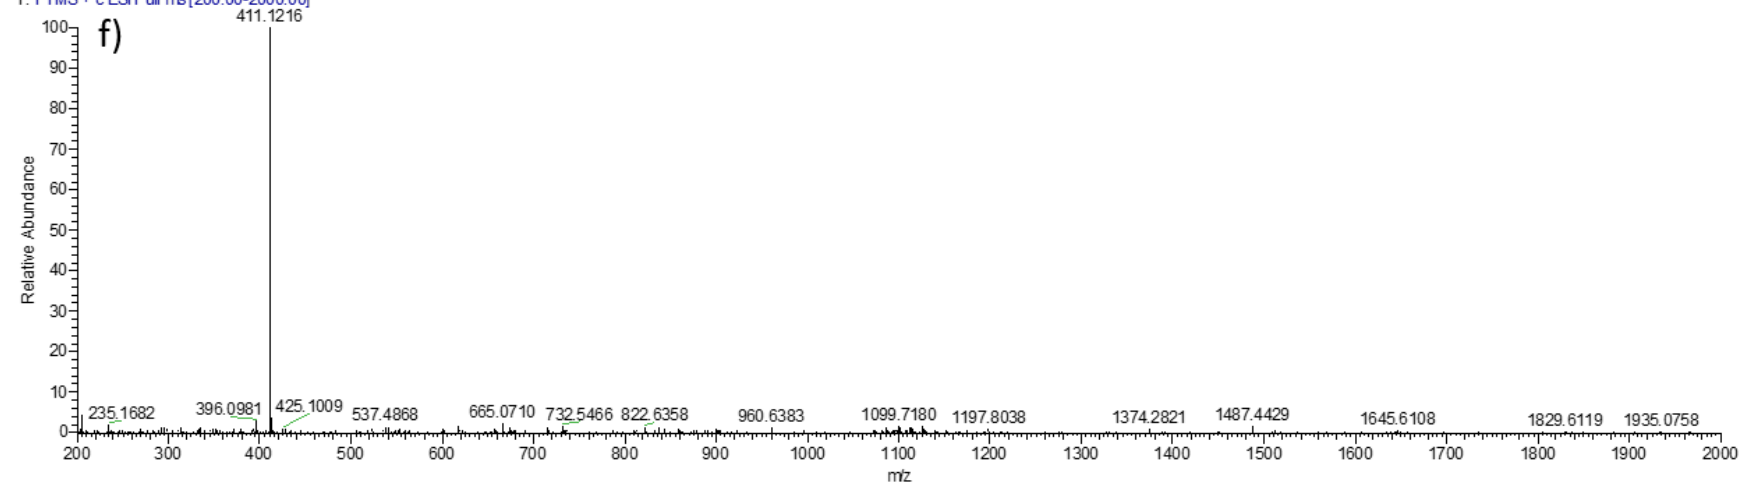

Figure S 78 HPLC-MS Extracted ion chromatogram (Extracted mass  $411 \pm 0.5$ ; corresponding mass to (3)) of a) *S. lividans*  $\Delta$ YA6; b) *S. lividans*  $\Delta$ YA6\_1E5; c) *S. lividans*  $\Delta$ YA6 $\Delta$ penA; d) *S. lividans*  $\Delta$ YA6 $\Delta$ penC; e) *S. lividans*  $\Delta$ YA6 $\Delta$ penD; peak visible in c); f) ESI Full MS chromatogram of the peak visible in c)  $R_t=13.47$

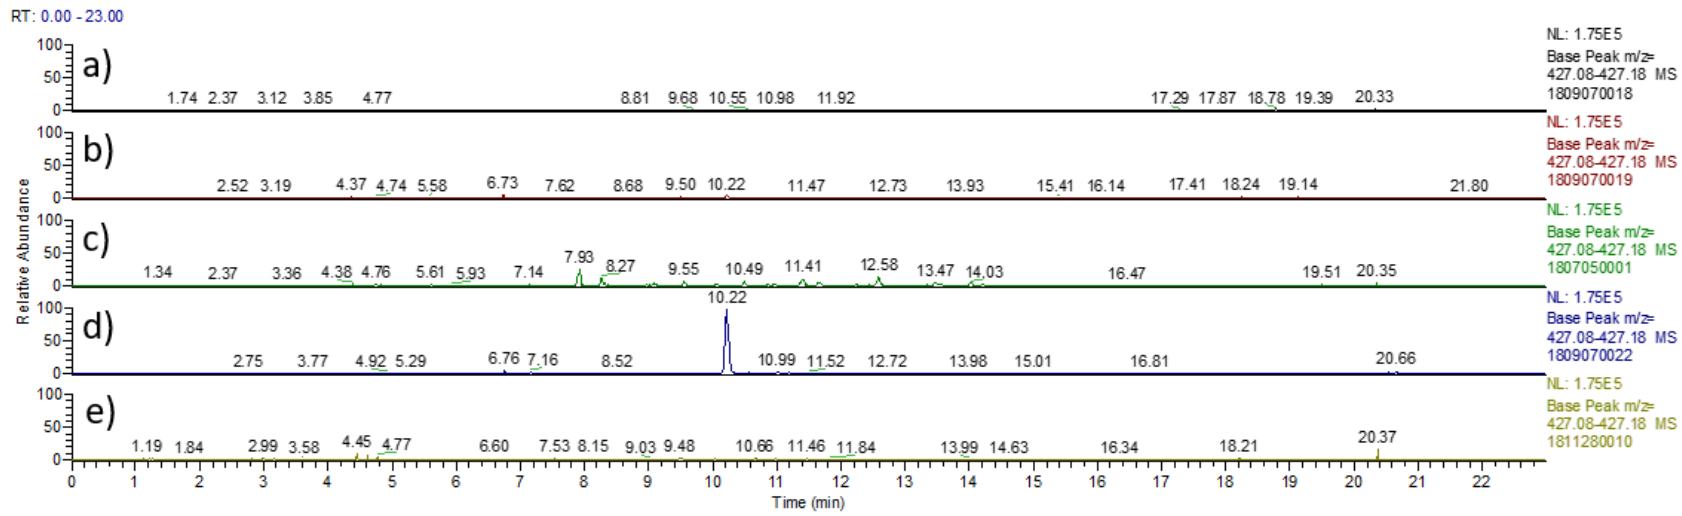

1809070022 #822 RT: 10.22 AV: 1 NL: 1.72E5

T: FTMS + cESI Full ms [200.00-2000.00]

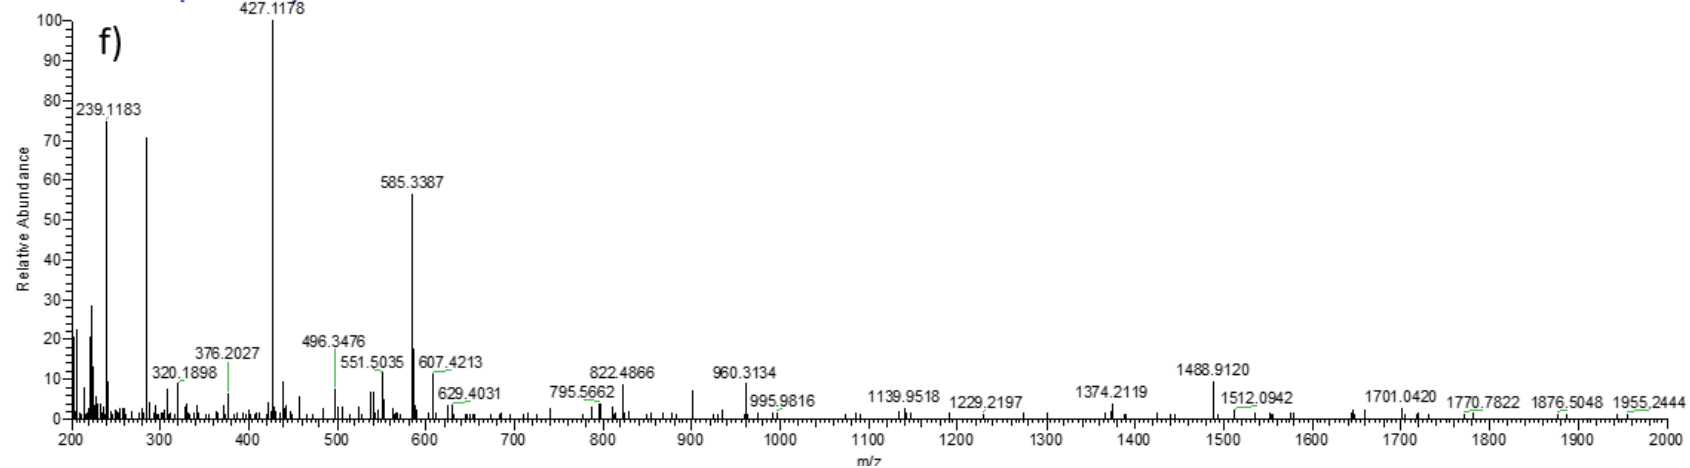

Figure S 79 HPLC-MS Extracted ion chromatogram (Extracted mass 427.09-427.18; corresponding mass to (4)) of a) *S. lividans*  $\Delta$ YA6; b) *S. lividans*  $\Delta$ YA6\_1E5; c) *S. lividans*  $\Delta$ YA6 $\Delta$ penA; d) *S. lividans*  $\Delta$ YA6 $\Delta$ penC; e) *S. lividans*  $\Delta$ YA6 $\Delta$ penD; peak visible in d); f) ESI full MS of the peak visible in d) ( $R_t=10.22$ )

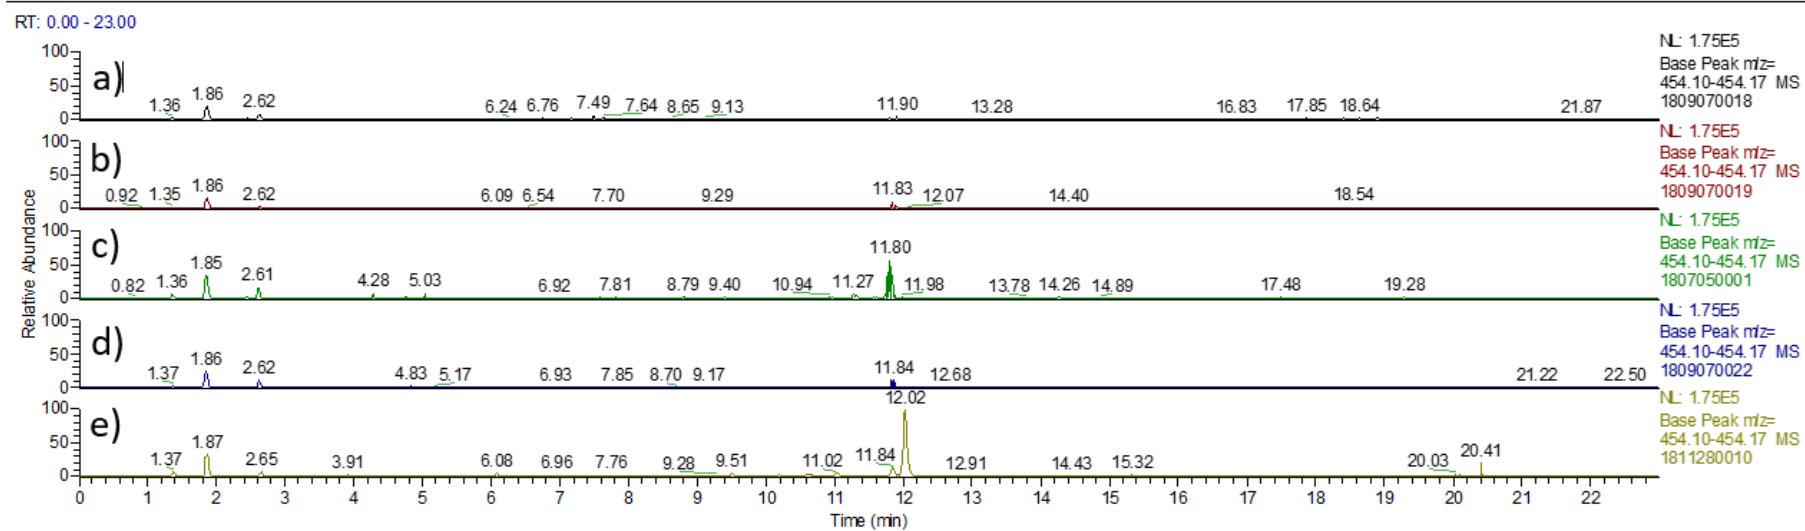

1811280010 #938 RT: 12.02 AV: 1 NL: 2.04E5  
T: FTMS + cESI Full ms [200.00-2000.00]

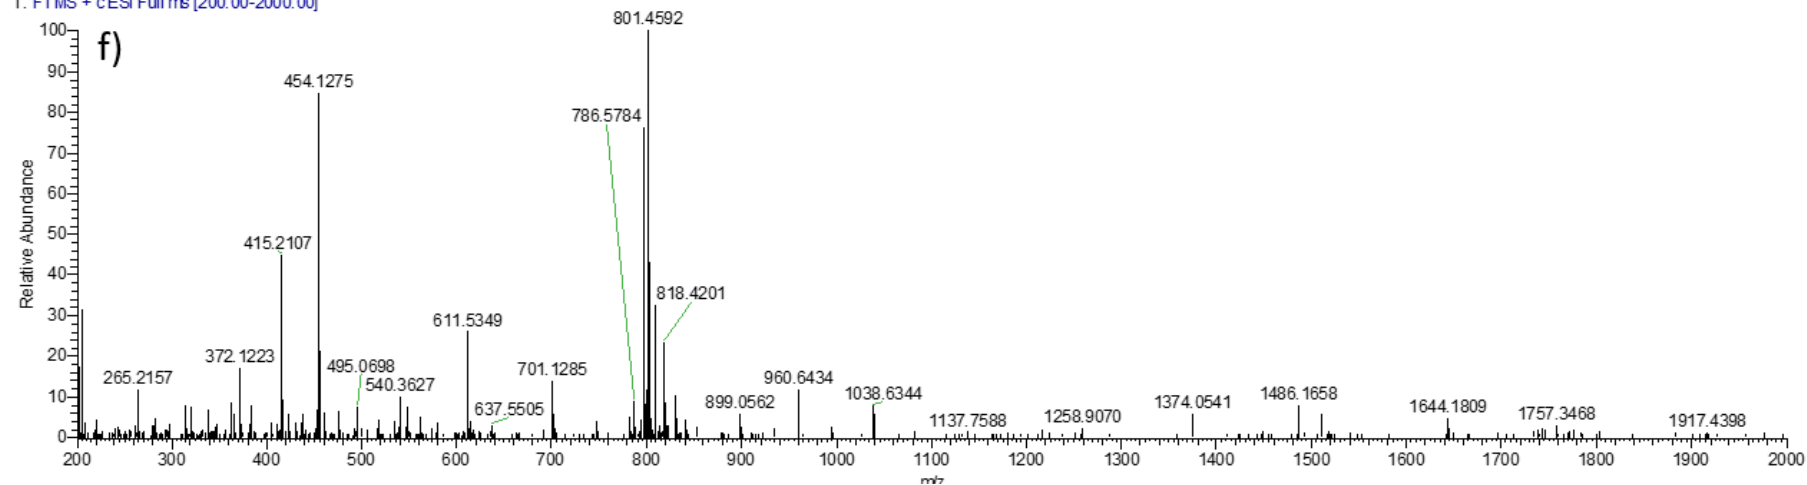

Figure S 80 HPLC-MS Extracted ion chromatogram (Extracted mass 454.10-454.17; corresponding mass to (5)) of a) *S. lividans*  $\Delta$ YA6; b) *S. lividans*  $\Delta$ YA6\_1E5; c) *S. lividans*  $\Delta$ YA6 $\Delta$ penA; d) *S. lividans*  $\Delta$ YA6 $\Delta$ penC; e) *S. lividans*  $\Delta$ YA6 $\Delta$ penD; peak visible in e); f) ESI full MS of the peak visible in e) ( $R_t=12.02$ )



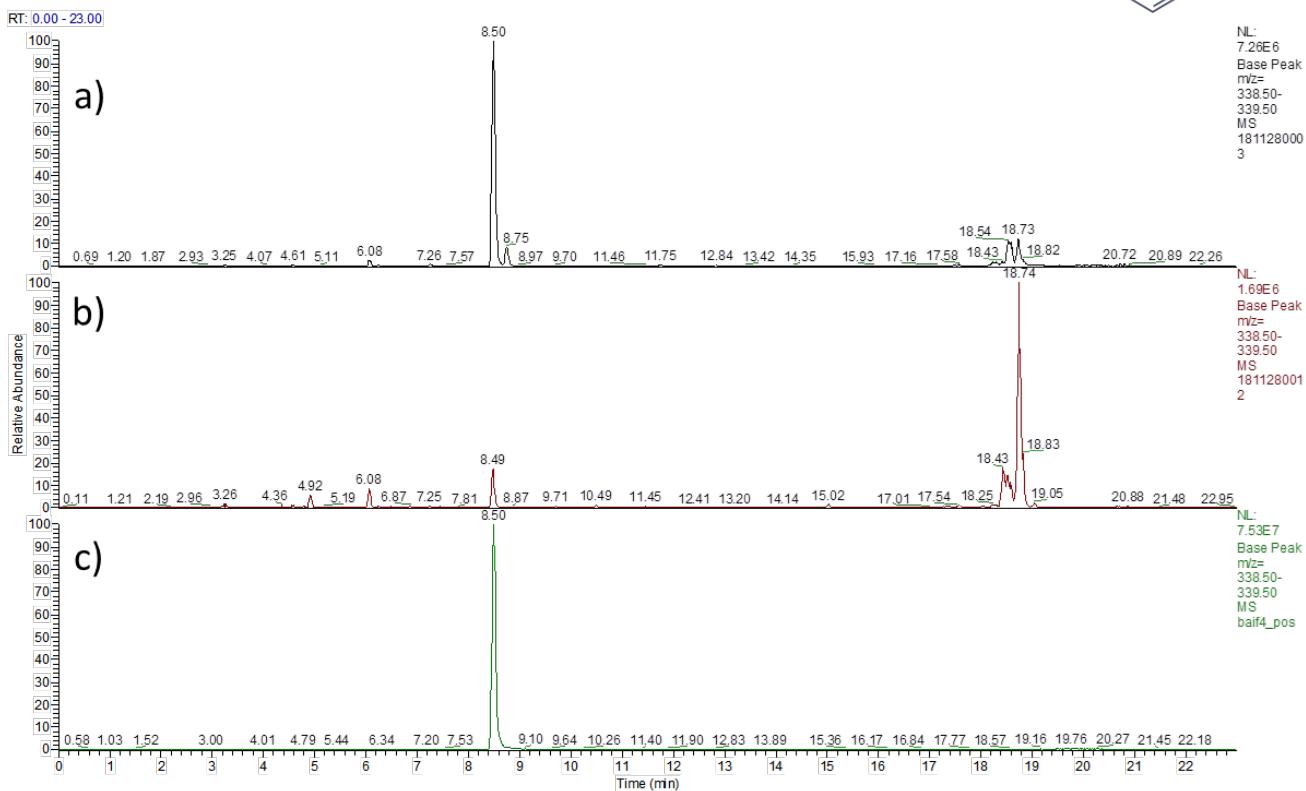

1

2 Figure S 81 HPLC-MS Extracted ion chromatogram (Extracted mass  $339 \pm 0.5$ , Rabelomycin) of a)  
 3 *S. lividans*  $\Delta$ YA6 1E5, b) *S. lividans*  $\Delta$ YA6 1E5 $\Delta$ penE c) pure rabelomycin as external standard

4

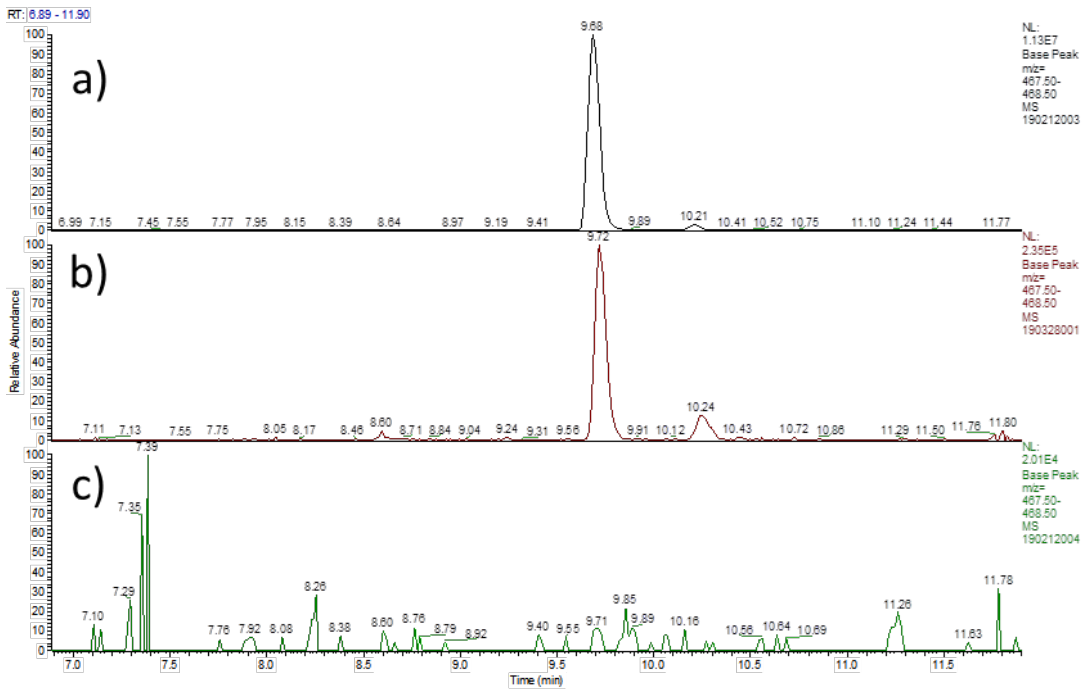

5

6 Figure S 82 HPLC-MS Extracted ion chromatogram (Extracted mass  $468 \pm 0.5$ , (1)) of a) *S. lividans*  $\Delta$ YA6

7 1E5, b) *S. lividans*  $\Delta$ YA6 1E5 $\Delta$ penR1 and c) *S. lividans*  $\Delta$ YA6 1E5 $\Delta$ penR2

8



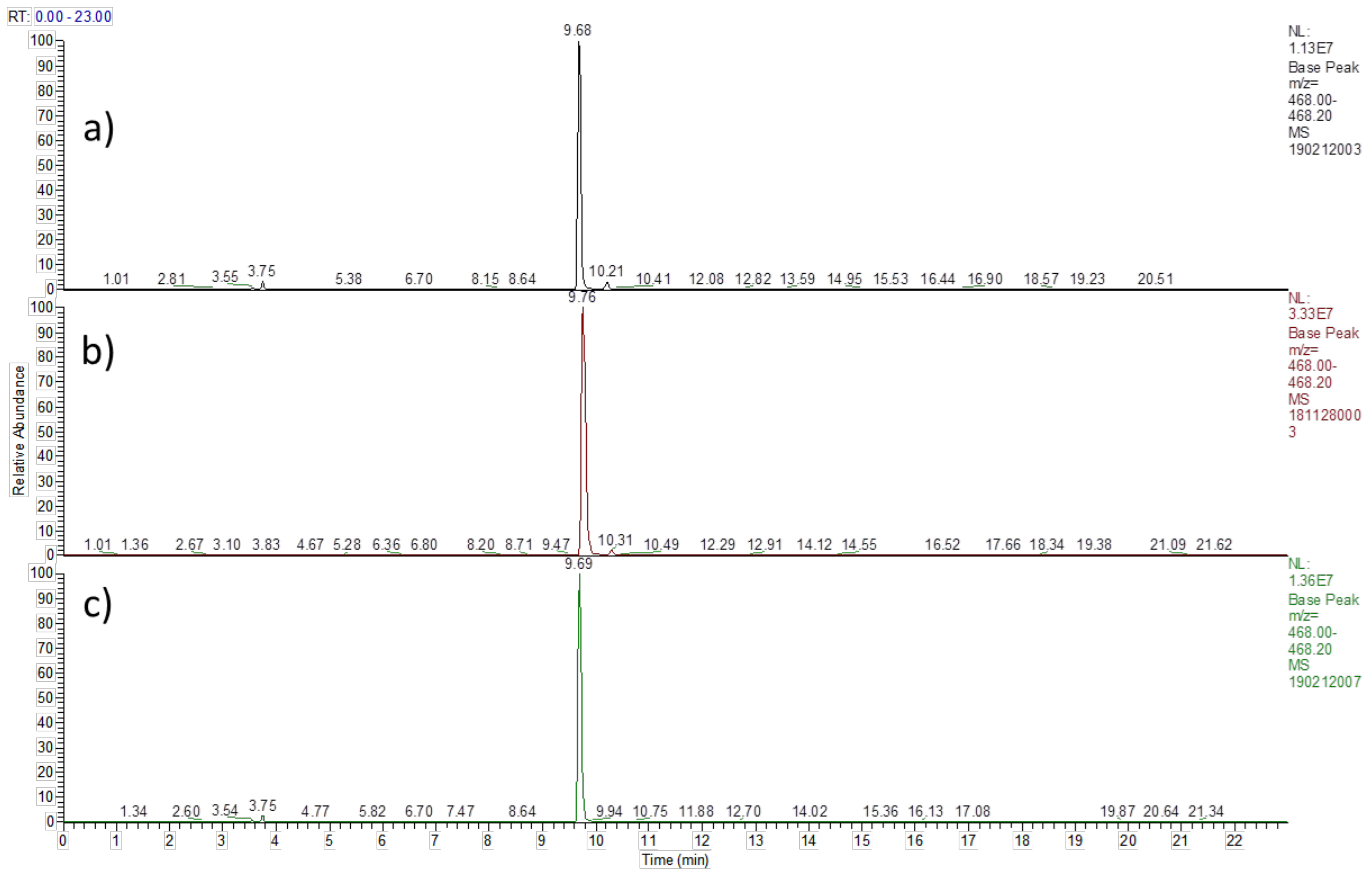

9

10  
11

Figure S 83 HPLC-MS Extracted ion chromatogram (Extracted mass  $468 \pm 0.5$  (1)) of a) *S. lividans*  $\Delta$ YA6 1E5, b) *S. lividans*  $\Delta$ YA6 A3\_penR1 1E5 and c) *S. lividans*  $\Delta$ YA6 A3\_penR2 1E5

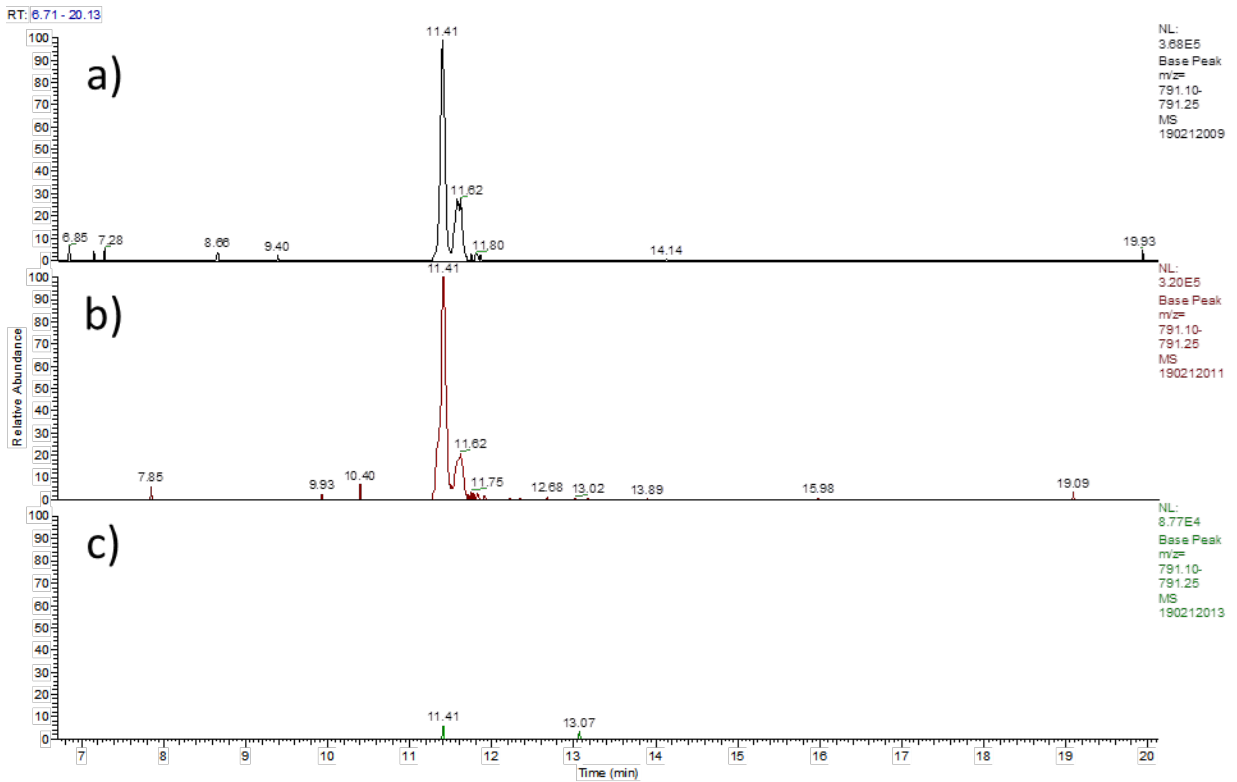

12

13 Figure S 84 HPLC-MS Extracted ion chromatogram (Extracted mass 791.10-791.25 (2)) of a) *S. lividans*  
 14  $\Delta$ YA6 1E5, b) *S. lividans*  $\Delta$ YA6 A3\_penR1 1E5 and c) *S. lividans*  $\Delta$ YA6 A3\_penR2 1E5

15

16

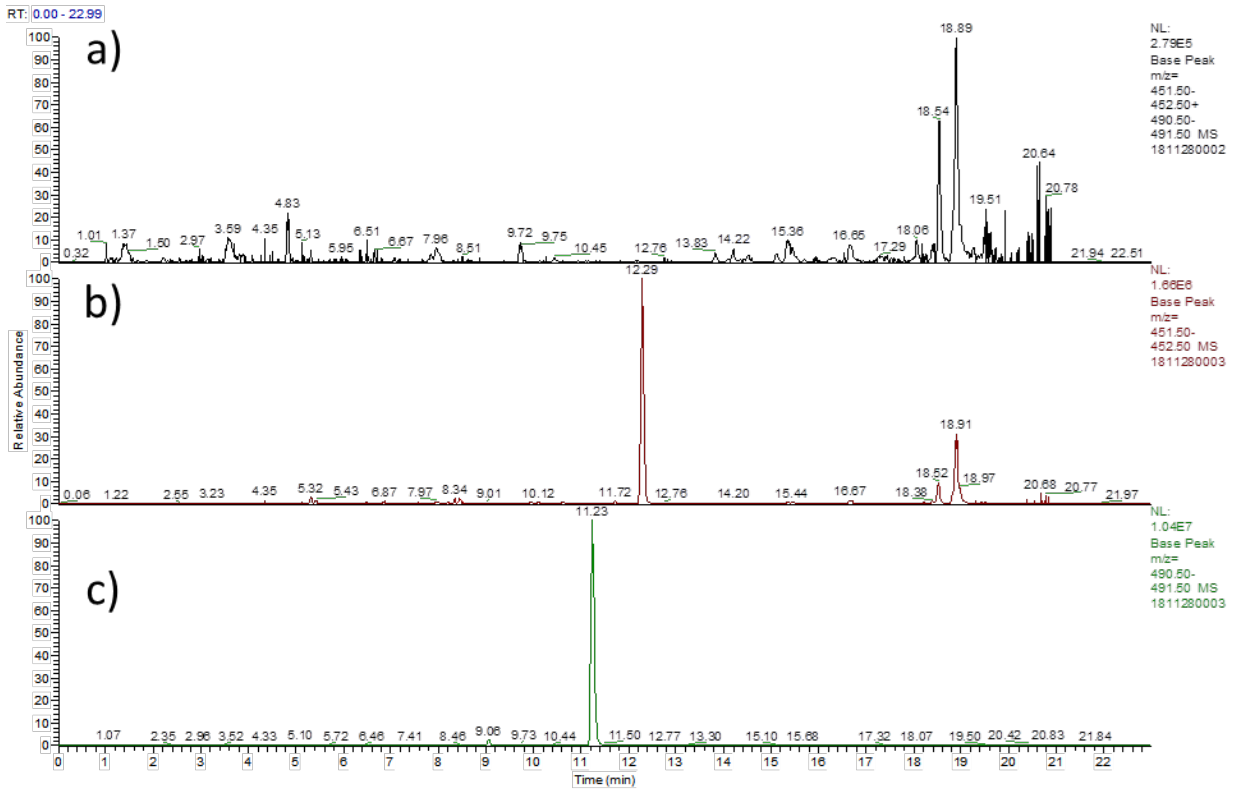

17

18 Figure S 85 HPLC-MS Extracted ion chromatogram a) *S. lividans*  $\Delta$ YA6 A3\_penR1 (Extracted mass  
 19  $491 \pm 0.5$  (6) and  $452 \pm 0.5$  (7)), b) *S. lividans*  $\Delta$ YA6 A3\_penR1 1E5 (Extracted mass  $452 \pm 0.5$  (7)) c)  
 20 *S. lividans*  $\Delta$ YA6 A3\_penR1 1E5 (Extracted mass  $491 \pm 0.5$  (6))

21

22

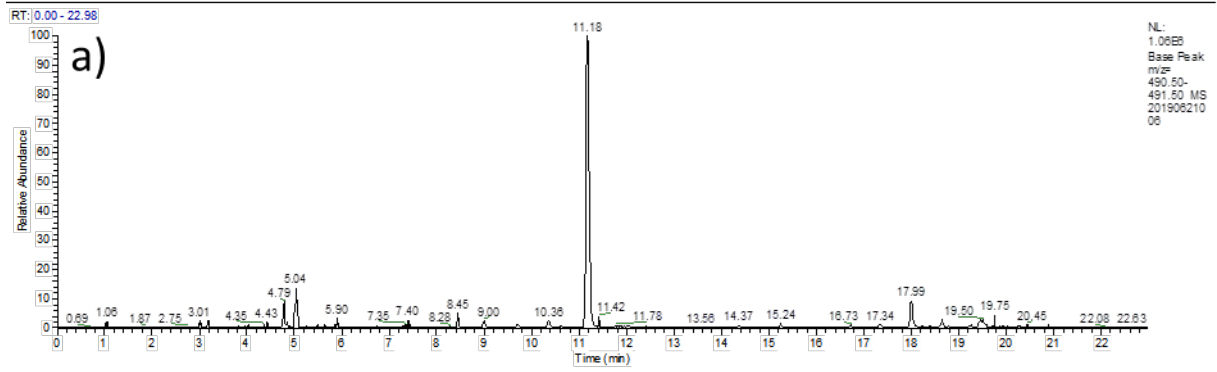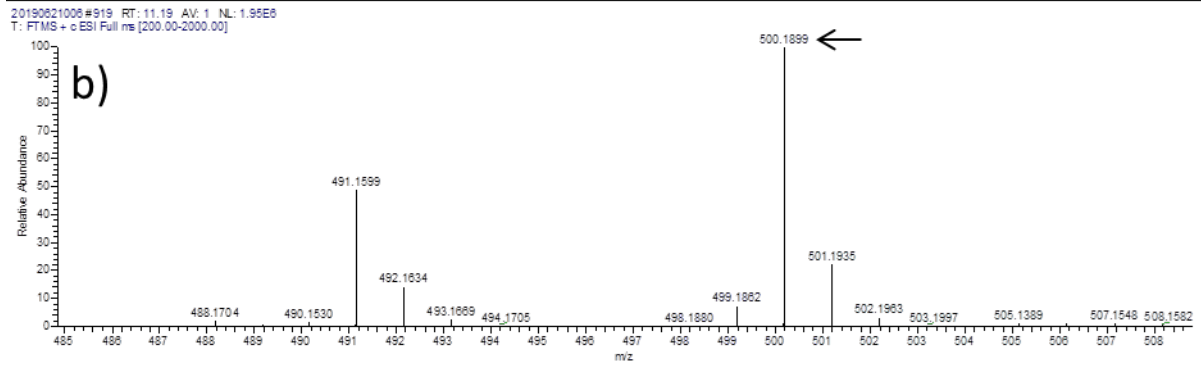

23

24

25

26

Figure S 86 HPLC-MS Extracted ion chromatogram (Extracted mass  $491 \pm 0.5$ ) of a) *S. lividans*  $\Delta$ YA6\_A3\_penR1 1E5 with L-tryptophan 13C-11 added to the medium b) MS-Chromatogram of a), incorporation of L-tryptophan 13C-11 visible

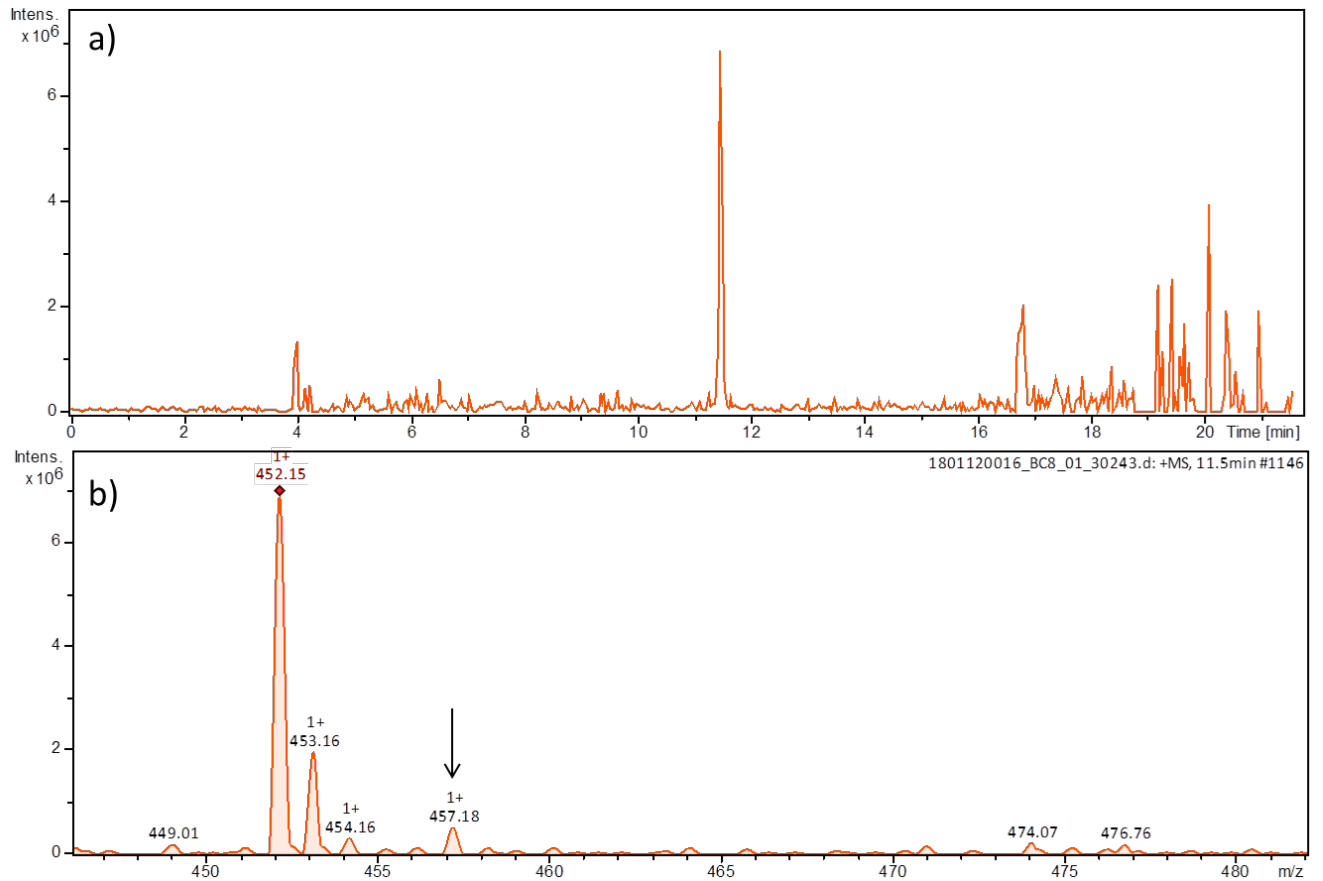

27

28 Figure S 87 HPLC-MS Extracted ion chromatogram (Extracted mass 452±0.5) of a) *S. lividans*  
 29 ΔYA6\_A3\_penR1 1E5 with 2D-5-labelled L-Phenylalanine added to the medium b) MS-  
 30 Chromatogram of a), incorporation of 2D-5-labelled L-Phenylalanine visible

31

- 32 1. (1) Chater, K. F.; Wilde, L. C. *J Gen Microbiol* 1980, 116, 323-334.  
33 2. (2) Labeda, D. P.; Lechevalier, M. P. *International Journal of Systematic and Evolutionary Microbiology* 1989,  
34 39, 420-423.  
35 3. (3) Wang, J.; Sarov, M.; Rientjes, J.; Fu, J.; Hollak, H.; Kranz, H.; Xie, W.; Stewart, A. F.; Zhang, Y. *Mol*  
36 *Biotechnol* 2006, 32, 43-53.  
37 4. (4) Kieser, T.; Bibb, M. J.; Buttner, M. J.; Chater, K. F.; Hopwood, D. A. 2010.  
38 5. (5) Strohlic, T. I.; Viaud, J.; Rennefahrt, U. E.; Anastassiadis, T.; Peterson, J. R. *Mol Cell* 2010, 40, 493-500.  
39 6. (6) Herrmann, S.; Siegl, T.; Luzhetska, M.; Petzke, L.; Jilg, C.; Welle, E.; Erb, A.; Leadlay, P. F.; Bechthold,  
40 A.; Luzhetsky, A. *Appl Environ Microbiol* 2012, 78, 1804-1812.  
41 7. (7) Myronovskyi, M.; Rosenkranzer, B.; Luzhetsky, A. *Appl Microbiol Biotechnol* 2014, 98, 4557-4570.  
42 8.

43 Publisher's Note: MDPI stays neutral with regard to jurisdictional claims in published maps and institutional  
44 affiliations.

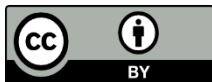

© 2020 by the authors. Submitted for possible open access publication under the terms and conditions of the Creative Commons Attribution (CC BY) license (<http://creativecommons.org/licenses/by/4.0/>).
